# Supplementary material for: PartnerCARE—a psycho-oncological online intervention for partners of patients with cancer: study protocol for a randomised controlled feasibility trial
Source: PubMed Central journal article supplement — BMJ Open. 2020 Oct 5;10(10):e035599. doi: 10.1136/bmjopen-2019-035599 (PMC7537440; doi:10.1136/bmjopen-2019-035599), 2020-10-05
Supplement: bmjopen-2019-035599.draft_revisions.pdf [file bmjopen-2019-035599.draft_revisions.pdf]

# BMJ Open

BMJ Open is committed to open peer review. As part of this commitment we make the peer review history of every article we publish publicly available.

When an article is published we post the peer reviewers' comments and the authors' responses online. We also post the versions of the paper that were used during peer review. These are the versions that the peer review comments apply to.

The versions of the paper that follow are the versions that were submitted during the peer review process. They are not the versions of record or the final published versions. They should not be cited or distributed as the published version of this manuscript.

BMJ Open is an open access journal and the full, final, typeset and author-corrected version of record of the manuscript is available on our site with no access controls, subscription charges or pay-per-view fees (<http://bmjopen.bmj.com>).

If you have any questions on BMJ Open's open peer review process please email [info.bmjopen@bmj.com](mailto:info.bmjopen@bmj.com)

# BMJ Open

## PartnerCARE – a psycho-oncological online intervention for partners of patients with cancer: Study protocol for a randomized controlled feasibility trial

|                               |                                                                                                                                                                                                                                                                                                                                                                                                                                                                                                                                                                                                                                                                                                                                                                                       |
|-------------------------------|---------------------------------------------------------------------------------------------------------------------------------------------------------------------------------------------------------------------------------------------------------------------------------------------------------------------------------------------------------------------------------------------------------------------------------------------------------------------------------------------------------------------------------------------------------------------------------------------------------------------------------------------------------------------------------------------------------------------------------------------------------------------------------------|
| Journal:                      | <i>BMJ Open</i>                                                                                                                                                                                                                                                                                                                                                                                                                                                                                                                                                                                                                                                                                                                                                                       |
| Manuscript ID                 | bmjopen-2019-035599                                                                                                                                                                                                                                                                                                                                                                                                                                                                                                                                                                                                                                                                                                                                                                   |
| Article Type:                 | Protocol                                                                                                                                                                                                                                                                                                                                                                                                                                                                                                                                                                                                                                                                                                                                                                              |
| Date Submitted by the Author: | 07-Nov-2019                                                                                                                                                                                                                                                                                                                                                                                                                                                                                                                                                                                                                                                                                                                                                                           |
| Complete List of Authors:     | Bodschwinna, Daniela; University Ulm Medical Centre, Department of Psychosomatic Medicine and Psychotherapy; Comprehensive Cancer Center Ulm (CCCU)<br>Lorenz, Inga; University Ulm Medical Centre, Department of Psychosomatic Medicine and Psychotherapy<br>Bauereiss, Natalie; Ulm University, Institut of Psychology and Education, Department of Clinical Psychology and Psychotherapy<br>Gündel, Harald; University Ulm Medical Centre, Department of Psychosomatic Medicine and Psychotherapy<br>Baumeister, Harald; Ulm University, Institut of Psychology and Education, Department of Clinical Psychology and Psychotherapy<br>Hoenig, Klaus; University Ulm Medical Centre, Department of Psychosomatic Medicine and Psychotherapy; Comprehensive Cancer Center Ulm (CCCU) |
| Keywords:                     | MENTAL HEALTH, ONCOLOGY, Adult oncology < ONCOLOGY                                                                                                                                                                                                                                                                                                                                                                                                                                                                                                                                                                                                                                                                                                                                    |
|                               |                                                                                                                                                                                                                                                                                                                                                                                                                                                                                                                                                                                                                                                                                                                                                                                       |

SCHOLARONE™  
Manuscripts

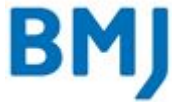

I, the Submitting Author has the right to grant and does grant on behalf of all authors of the Work (as defined in the below author licence), an exclusive licence and/or a non-exclusive licence for contributions from authors who are: i) UK Crown employees; ii) where BMJ has agreed a CC-BY licence shall apply, and/or iii) in accordance with the terms applicable for US Federal Government officers or employees acting as part of their official duties; on a worldwide, perpetual, irrevocable, royalty-free basis to BMJ Publishing Group Ltd ("BMJ") its licensees and where the relevant Journal is co-owned by BMJ to the co-owners of the Journal, to publish the Work in this journal and any other BMJ products and to exploit all rights, as set out in our [licence](#).

The Submitting Author accepts and understands that any supply made under these terms is made by BMJ to the Submitting Author unless you are acting as an employee on behalf of your employer or a postgraduate student of an affiliated institution which is paying any applicable article publishing charge ("APC") for Open Access articles. Where the Submitting Author wishes to make the Work available on an Open Access basis (and intends to pay the relevant APC), the terms of reuse of such Open Access shall be governed by a Creative Commons licence – details of these licences and which [Creative Commons](#) licence will apply to this Work are set out in our licence referred to above.

Other than as permitted in any relevant BMJ Author's Self Archiving Policies, I confirm this Work has not been accepted for publication elsewhere, is not being considered for publication elsewhere and does not duplicate material already published. I confirm all authors consent to publication of this Work and authorise the granting of this licence.

1  
2  
3 **PartnerCARE – a psycho-oncological online intervention for**  
4 **partners of patients with cancer: Study protocol for a**  
5 **randomized controlled feasibility trial**  
6  
7  
8  
9

10 Daniela Bodschwinna<sup>1,2\*</sup>, Inga Lorenz<sup>1</sup>, Natalie Bauereiss<sup>3</sup>, Harald Gündel<sup>1</sup>, Harald Baumeister<sup>3</sup>,  
11 Klaus Hoenig<sup>1,2</sup>  
12  
13

14 <sup>1</sup> Department of Psychosomatic Medicine and Psychotherapy, University Medical Center Ulm, Germany  
15

16 <sup>2</sup> Comprehensive Cancer Center Ulm (CCCU), Germany  
17

18 <sup>3</sup> Department of Clinical Psychology and Psychotherapy, Institute of Psychology and Education, University  
19 of Ulm, Germany  
20  
21  
22  
23  
24  
25  
26  
27  
28  
29  
30  
31  
32  
33  
34  
35  
36  
37

38 \*Corresponding author  
39

40 **Address for Correspondence:**  
41

42 Daniela Bodschwinna  
43

44 Department of Psychosomatic Medicine and Psychotherapy, University Medical Center Ulm  
45

46 Albert-Einstein-Allee 23  
47

48 89081 Ulm, Germany  
49

50 Phone: +49731/5032815, Email: [daniela.bodschwinna@uni-ulm.de](mailto:daniela.bodschwinna@uni-ulm.de)  
51  
52  
53  
54

55 Protocol version 1 – 21/10/2019  
56

57 Word count: 5675  
58  
59  
60

## Abstract

**Introduction:** Cancer burdens not only the patient, but also the partner to a comparable extent. Partners of patients with cancer are highly involved in the caring process by providing physical care, treatment administration and emotional support. Therefore, they often experience distress and report a low quality of life. Interventions for supporting partners are scarce. Existing ones are rarely used by partners because they are often time consuming *per se* and offer only limited flexibility with regard to schedule and location. The online intervention PartnerCARE has been developed on the basis of caregiver needs and consists of tailored support combining psycho-educational, cognitive-behavioural and imaginative elements. The aim of the study is to evaluate feasibility and acceptance of the online intervention PartnerCARE and of the trial process as well as to gain first insights of the putative effectiveness of PartnerCARE.

**Methods and analysis:** A two arm parallel group randomized controlled trial (RCT) will be conducted to compare the PartnerCARE online intervention with a waitlist control group. The study aims to recruit n=60 partners of patients with any type of cancer across different access paths (e.g. university medical centres, support groups, social media). Congruent with feasibility study objectives, the primary outcome comprises recruitment process, study procedure, acceptance and satisfaction with the intervention (CSQ-I), possible negative effects (INEP) and drop-out rates. Secondary outcomes include quality of life, distress, depression, anxiety, caregiver burden, fear of progression, social support, self-efficacy, coping and loneliness. Online measurements will be performed by self-assessment at three time points (baseline/pre-randomization, 2 months and 4 months after randomization). Data analyses will be based on intention-to-treat principle.

**Ethics and dissemination:** Ethics approval has been granted. Results from this study will be disseminated to relevant healthcare communities, in peer-reviewed journals and at scientific and clinical conferences.

**Keywords:** cancer, caregiver, partner, spouse, distress, quality of life, caregiver burden, e-health

**Trial Registration number:** DRKS00017019. Registered on 08 April 2019.

### Strengths and limitations of this study

- Randomized controlled feasibility trial of a novel online intervention specifically tailored to the care needs of partners of patients with cancer
- The PartnerCARE Online intervention integrates evidence-based psychological support including psycho-educational, cognitive-behavioural and imaginative components
- Low-threshold intervention for partners with low utilization of psychosocial services due to time and logistic limitations, low self-awareness of own care needs as well as gender-related concerns (e.g. male partners)
- Possible adverse effects of the intervention will be monitored
- Challenges of the trial comprise the diverse target group (regarding e.g. age, diagnosis of the patient, progress of the disease) and technical comprehension of the participants

## Introduction

Family members, particularly the partners, are increasingly involved in care of individuals with cancer [1]. They support the patient in daily life (e.g. manage treatment appointments, additional tasks in the household, manage medication, provide emotional support) and are often not aware of their own needs [2,3]. The disease and the corresponding challenging situation can lead to a great impact on the partner's wellbeing and health. Partners are at high risk to suffer from various types of problems including social and emotional problems [4]. Hence caregivers of cancer patients reported significant more impairments than non-caregivers regarding work productivity, activity and quality of life [5]. Whereas the physical quality of life of partners is similar to a norm population, their reported mental quality of life is significantly lower [6]. Caregivers have also a significant higher occurrence of stress-related comorbidities like depression (OR=1.50), anxiety (OR=1.97) or insomnia (OR=2.01) compared to non-caregivers [5] and similar prevalence of depression (RR=1.01) and anxiety (RR=.71) compared to the patients [7,8]. Concurrently specific burden of caregivers often stays invisible, due to the fact that the health care system focus on the patient and partner's supportive care needs are often neglected or not reported proactive from partners [9]. Male partners as caregivers are a particularly under-recognized and under-supported group [10].

Several psychosocial interventions have been designed to address the needs of cancer caregiver. The interventions differ regarding to their aim (e.g. reduce caregiver burden, improve quality of life), the underlying approaches (e.g. psychoeducation, cognitive-behavioural therapy, existential therapy), delivering format (e.g. face-to-face, online, telephone and group therapy, dyadic, individual) and addressed participants (e.g. couple, patient alone). Systematic reviews have shown that these interventions have small to medium positive effects on multiple outcomes for caregivers [11–13], but interventions relying solely on cognitive behavioural therapy have only negligible effects on caregivers [14]. In general intervention studies often lack of reporting how to implement the interventions into practice [15]. Online interventions move into focus since the last decade and they are broadly perceived as suitable, acceptable and helpful for cancer caregivers [16–18]. Advantages of online interventions over other treatment delivering formats are easy and quick accessibility, flexibility regarding time and location independency and allowance for caregivers privacy while seeking for information and support [19,20]. Furthermore nearly a half of the caring partners are interested in using online interventions and would prefer an intervention that takes less than 1 hour per week, lasts minimum five weeks, is addressed to the partner only and contains information and peer support [21,22].

In the context of the German National Cancer Plan the Federal Ministry of Health requests appropriate psycho-oncological care for all patients and caregivers in need [23,24] irrespective of

1  
2  
3 inpatient or outpatient treatment. A recent report on the psycho-oncological care in Germany  
4 recommends to develop and promote innovative offers like e-health programs [25]. Despite the  
5 structures and recommendations a lot of patients and caregivers receive no or no promptly and  
6 no low-threshold psycho-oncological care in Germany [26].  
7  
8  
9

10 Already developed or planned online interventions for caregivers address couples [27,28],  
11 informal caregivers in general (including partners, child, parent) [29,30] or male  
12 caregivers/caregivers of patients with a specific type of cancer [31,32], while only one hitherto  
13 known intervention particularly addresses partners [33]. None of them is available in German.  
14  
15 The results from online interventions for caregivers are rare, because to date most of them did  
16 only publish study protocols [32,33] or promising trend results from feasibility studies [27–31].  
17  
18  
19

## 20 **Aim**

21  
22 The present study has two aims. First, we want to evaluate the feasibility of the online intervention  
23 PartnerCARE and the extend of participants' satisfaction with the intervention. Second, the  
24 potential effectiveness of PartnerCARE on the partner's wellbeing will be investigated compared  
25 to the waitlist control group post treatment and over 4-month follow-up. The results of this study  
26 will be used to optimize the online intervention via participant feedback and to plan and conduct  
27 a confirmatory effectivity evaluation of the intervention.  
28  
29  
30  
31  
32  
33  
34  
35

## 36 **Methods**

### 37 **Study design**

38  
39 This is a two arm, parallel randomized controlled trial comparing the online intervention  
40 PartnerCARE (intervention group, IG) with a waitlist control group (CG). Participants of the  
41 intervention group receive the guided version (with individual feedback from an e-coach) of  
42 PartnerCARE. The control group receives no intervention during the study. After a waiting period  
43 of 4 months participants of the control group get the opportunity to work on the unguided version  
44 (with automatic feedback) of PartnerCARE. Assessments of the primary and secondary outcomes  
45 take place at baseline (T0), 2 months after randomization (post-treatment, T1) and 4 months after  
46 randomization (follow-up, T2).  
47  
48  
49  
50  
51  
52  
53

54 This clinical trial has been approved by the ethics committee of Ulm University (No. 390/18) and  
55 will be conducted and reported in accordance with the Consolidated Standards of Reporting Trials  
56 (CONSORT) Statement for pilot RCTs [34] as well as the guidelines for executing and reporting  
57 internet intervention research [35]. The study protocol is reported according to the SPIRIT  
58  
59  
60



(Standard Protocol Items: Recommendations for Interventional Trials) 2013 Statement [36]. This study is registered in the German clinical trial register under [DRKS00017019](https://www.drks.de/DRKS00017019).

### **Inclusion and exclusion criteria**

The primary inclusion criterion for participation is to be in a relationship with a partner who is diagnosed with any type of cancer (initial diagnosis or relapse, regardless of the onset of the disease). Participants are required (1) to be age 18 or above, (2) have an internet access and an appropriate device, (3) provide the study team an e-mail address for contact reasons and (4) sign an informed consent. Participants will be excluded if the partner with cancer has died before the start of the study. Inclusion and exclusion criteria will be checked at the first online assessment (T0) via self-report.

### **Recruitment**

Recruitment took place online and offline in the complete German-speaking area (includes Germany, Austria and Switzerland). Participants are recruited in relevant social media groups (e.g. groups for caregivers of patients with cancer), in online communities, via flyers and circular emails in university medical centres, links on clinic homepages, online and offline support groups, cancer counselling centres and comprehensive cancer centres (CCCs). All recruitment routes lead to the PartnerCARE study homepage ([www.esano.klips-ulm.de/de/trainings/krebserkrankung/partnercare/](http://www.esano.klips-ulm.de/de/trainings/krebserkrankung/partnercare/)), where potential participants get information and can register for the study via contact form or sending an e-mail to the study team. Recruitment started in April 2019 and is still ongoing until the target sample size will be reached.

### **Study Procedure**

After initial contact via study homepage or e-mail interested partners receive an e-mail from the study team including a PDF with detailed participation information and an informed consent form attached. After given informed consent (via e-mail, fax or mail), participants get an invitation to the online baseline assessment (T0) and will be randomized afterwards either to the intervention group (immediately access to the guided version of PartnerCARE) or to the waitlist control group (access to the unguided version of PartnerCARE after about 4 months according to the follow-up assessment). Participants are informed via e-mail about group affiliation. 2 months and 4 months after randomization all participants receive an invitation for post-treatment and follow-up assessment (Figure 1).

*\*\*\* Please insert figure 1 about here\*\*\**

## Randomization

Randomization and allocation of participants to two groups is conducted by an independent researcher, who is not involved in other processes of the study, using an automated online randomization program ([www.sealedenvelope.com](http://www.sealedenvelope.com)). Permuted block randomization with randomly arranged block sizes (2 and 4) with an allocation ratio of 1:1 is performed.

## Intervention

### *Development of the intervention*

The development of PartnerCARE was inspired by a therapy manual for a structured group intervention about psychoeducation with cancer patients [37] and internet intervention standards established by the research group [e.g. 38]. This group intervention was adapted to an individually online format and to the specific needs of caregivers. A literature search was conducted, focusing on current reviews, qualitative and quantitative research about needs of cancer caregivers. An overview of caregiver needs is listed in Table 1. The most relevant topics out of the caregiver needs are included into the PartnerCARE intervention and some topics that may only be relevant to some are provided as optional additional sessions (e.g. sexuality, death and dying). As PartnerCARE is an offer to partners of patients with any kind of cancer, we abstained from putting detailed information about specific cancer disease and treatment into the intervention to avoid an overload of the single sessions. Instead a list of relevant websites with further information and help services is provided in the 6<sup>th</sup> session.

In order to ensure participant motivation several persuasive elements were integrated in the design of PartnerCARE [39–41]. The reduction principle is used by providing a weekly activity plan where participants record small activities for each day to learn in small and simple steps to improve self-care. At the beginning of each session the experience with the activities are queried (rehearsal principle). The tunneling principle is implemented by guiding the participants through the intervention with feedback after each session from the e-coach. Reminders are sent if the weekly session is exceeded 2 days. Three exemplary partners are specifically developed regarding the similarity and social learning principle by telling their story, giving exemplary answers on exercises and accompany the participants through the sessions. The exemplary partners are also provided to show participants that they are not alone with their burdens. The online intervention is offered through Minddistrict ([www.minddistrict.com](http://www.minddistrict.com)), an e-health platform where a secure access to the online intervention and a secure exchange between participant and e-coach is granted. The internet platform and the intervention are available 24 hours a day and 7 days a week.

1  
2  
3 The first version of PartnerCARE (main sessions) was evaluated by 4 independent psycho  
4 oncologists who were not involved in the development process. Each psycho oncologist valued  
5 one session via the think aloud method [42]: while they were working on the session they were  
6 encouraged to vocalize what they are thinking at the moment. Participant comments were  
7 collected on a list and used to further develop PartnerCARE regarding user friendliness (e.g. insert  
8 of progress bars on each page), text formulations (e.g. incomprehensible and too psychological  
9 phrases verbalized more generally understandable) and content adjustments (e.g. connections to  
10 previous sessions). The overall development process lasted from January 2018 until February  
11 2019.  
12  
13  
14  
15  
16  
17

18 \*\*\* Please insert table 1 about here\*\*\*  
19

### 20 *Content of the intervention*

21

22  
23 The content of the online intervention PartnerCARE (Table 2) is composed of different empirically  
24 evaluated and clinically established manuals [e.g 37,43]. In the intervention we combined content  
25 of different reliable approaches, which are shown to be effective for caregivers [e.g.12]: psycho-  
26 education, cognitive behavioural therapy and imagination elements. Therefore, the intervention  
27 focuses on activating resources, positive activities, communication skills, improving self-care and  
28 self-help strategies to manage caregiver burdens. In addition to psycho-educative text the  
29 intervention contains visual and audio materials to enhance understanding and readability as well  
30 as to increase adherence and efficacy [44]. Practical exercises, the 3 exemplary partners and  
31 imagination exercises make the intervention interactive. To create a transfer of the learned  
32 content and strategies into daily life, examples and exercises for home practice between the  
33 lessons are contained. PartnerCARE consists of one introduction session, six main consecutive  
34 sessions, four optional additional sessions with specific content and one booster session. The  
35 optional sessions are presented at the third main session and can be selected by the participant.  
36 Duration of each session varies from 30 to 60 minutes, but there is no time limit. Participants can  
37 take breaks within a session whenever and how often they want. It is recommended to work on  
38 one session each week to have enough time between the sessions for practicing. Therefore, at the  
39 end of each session participants are asked to set an appointment for working on the next session.  
40  
41  
42  
43  
44  
45  
46  
47  
48  
49

50 To have a clear structure over the whole intervention, every session follows the same process:

- 51 1. Today's feeling: rating on a burden thermometer from 0 ("no burden") to 10 ("high  
52 burden") and describing the current feeling
  - 53 2. Report of home practice from the last week
  - 54 3. Basic information: psychoeducation about the topic of the lesson
  - 55 4. Practical exercises: During the session or for practice between the sessions
- 56  
57  
58  
59  
60

- 1
- 2
- 3 5. Preview of the main topic from the next session
- 4
- 5 6. Imagination exercise: audio imagination of approximately 10 minutes with different
- 6 topics
- 7
- 8
- 9

10 \*\*\* Please insert table 2 about here\*\*\*

### 11 *Guidance*

12 For participants of the intervention group, who receive the guided version of PartnerCARE, every  
13 session is accompanied by an e-coach through written feedback. The feedbacks are partly  
14 standardized and will be individualized dependent on entries from the participant, encouraging  
15 them to stay motivated working on the intervention. Since it is aimed that e-coaches need about  
16 10 minutes in average for writing a feedback due to time efficiency, the actual feedback time is  
17 measured. Participants receive the feedback within the next two weekdays after completing a  
18 session. Participants can also write a personal message to the e-coach via the Minddistrict  
19 platform if they have for example questions or technical problems. Guidance in online  
20 intervention is used to increase efficacy, adherence and decrease dropout [45,46].

### 21 *Text Message Coach*

22 Participants can choose in session 1 if they want to be supported additionally with two SMS per  
23 week during the intervention (at no charge for the participant). SMS are sent via online platform  
24 MessageBird ([www.messagebird.com](http://www.messagebird.com)). The Text Message Coach is thematically matched with the  
25 intervention and accompanies each session with two messages and after the main sessions one  
26 message per week until the booster session (in total 15 SMS). The text messages include  
27 motivational quotes, mini-tasks and reminder of positive activities or exercises, for example  
28 “Before you go to bed tonight, look back on your day. Remember: What beautiful moments have  
29 you experienced today?”. It has been shown that SMS support may have the effect to enhance the  
30 intervention effect [47].

### 31 *Control condition*

32 Participants of the waitlist control group receive no intervention during the study phase but they  
33 are free to use other treatment options in standard care. Four months after randomization and  
34 after completing the follow-up questionnaire (T2) they get access to the unguided version of  
35 PartnerCARE. The intervention is the same as in the intervention group, but instead of  
36 individualized feedback they receive a short automatic feedback after each session and the  
37 possibility to choose the Text Message Coach in session 1 as well.

## Sample size/power calculation

Since with this study the practicality and feasibility of PartnerCARE will be evaluated as the primary outcome, a formal sample size calculation is not required. A sample size of  $n=60$  was chosen as a recommendation for pilot trials [48]. Part of the feasibility study is to explore the feasibility of recruitment and rating of the different recruitment strategies.

## Assessments

All Assessments take place at the online survey platform Unipark ([www.unipark.de](http://www.unipark.de)). Table 3 shows all outcomes and time points. Socio demographic variables include age, sex, marital status, nationality, education, occupational situation and number of children. In addition, clinical characteristics from the diseased partner are assessed with single questions: cancer diagnosis, date of diagnosis, phase of the disease and current medical treatments. Participants will be reminded via email to complete surveys if they do not respond to invitation email.

## Primary Outcome

Primary Outcome of this pilot RCT study is the feasibility of the PartnerCARE online intervention. To characterize the different aspects of feasibility a variety of questionnaires is used. The measurement of feasibility is composed of satisfaction with the online intervention, possible negative effects, attitudes toward psychological online interventions, participant flow, drop-out rates, duration of the intervention, processing duration of the lessons, effort from the e-Coaches, evaluation of the SMS-Coach, technical difficulties and individual feedback from participants.

User Satisfaction with web-based health interventions is measured with the *Client Satisfaction Questionnaire adapted to Internet-based interventions (CSQ-I)* [49]. Eight items are rated on a four-point Likert-Scale from 1 (“does apply to me”) to 4 (“does totally apply to me”) which leads to a sum score range from 8 to 32. The scale demonstrated good reliability and construct validity. The CSQ-I is being only submitted to the IG post treatment and follow up.

Possible negative effects of the online intervention are assessed with an online adapted version of the *Inventory for the Assessment of Negative Effects in Psychotherapy (INEP)* [50]. The original 21 items were adapted at the online setting by modifying text (“online intervention” instead of “therapy”) and replacing items about the relationship between participant and therapist with items about the e-coach. The adjusted inventory consists of 8 items with a 7-step bipolar format ( $-3$  = definitely a negative effect;  $0$  = unchanged;  $+3$  = definitely a positive effect) and 14 items with a 4-step unipolar format (from  $0$  (“strongly disagree”) to  $3$  (“fully agree”). Additionally, the first 17 items record whether any negative effect is attributed on the online intervention or on other circumstances in life. For the last 5 items there is an open question in what way the statement applies. The internal consistency for the original INEP was good ( $\alpha=.86$ ).

1  
2  
3 Participants of the IG receive the online adapted version of the INEP (INEP-On) post treatment  
4 and follow up. In contrast, participants of the CG receive an abridged and adjusted INEP version  
5 with 14 items (INEP-CG) about the participation in the study and whether any negative effect is  
6 attributed on the participation in the study or on other circumstances in life post treatment and  
7 follow- up. Both questionnaires include the question “Since or during the online  
8 intervention/participation of the study I had suicidal thoughts/intentions for the first time.”.  
9 Participants who score with 1 (“agree a little bit”) receive automatically an email with information  
10 about available health care services in case of emergency. They are advised to seek for help if the  
11 symptoms increase. Participants who score 2 or 3 (“agree partly” or “fully agree”) receive likewise  
12 the automatically emergency email and additionally a psychotherapist of the study management  
13 call the participant to clarify if they distance themselves from suicidal ideation.

21 The attitude towards online interventions is assessed with the *Attitudes towards*  
22 *Psychological Online Interventions Questionnaire (APOI)* [51]. The APOI consist of 16 five-step  
23 items (from 1 “totally agree” to 5 “totally disagree”) which can integrate into four subscales:  
24 Scepticism and Perception of Risks (SCE), Confidence in Effectiveness (CON), Technologization  
25 Threat (TET) and Anonymity Benefits (ABE), with a theoretical range of 4 to 20 for each subscale.  
26 The total sum score ranges from 16 to 80 whereas higher scores imply a positive attitude towards  
27 online interventions. The medians of the scales can be used to classify the scores (56 for the total  
28 sum score, 9 for SCE, 16 for CON, 12 for TET and 12 for ABE). Cronbach’s’ alpha with  $\alpha=.77$  shows  
29 an acceptable to good internal consistency. The APOI is given to all participants at all three  
30 measurement points.

37 The SMS Coach is evaluated with three items at post treatment from participants of the IG:  
38 “The SMS Coach was helpful.”, “The content of the SMS was pleasant.” and “The SMS Coach was  
39 motivating.”. The items are scored on a five-point scale from 1 (“never”) to 5 (“always”).

43 After each finished PartnerCARE lesson at the Minddistrict platform the participants have  
44 the possibility to give individual feedback to the lesson. First, they can rate the lesson from 1 (“did  
45 not like at all”) to 10 (“did like very much”). One question is about the scope of the lesson (“too  
46 extensive”, “too short”, “just right”). Then four open questions ask about which exercise was most  
47 helpful, what was positive, what could be improved and how long took it to complete the lesson.

### 52 **Secondary Outcomes**

54 The *NCCN Distress Thermometer (DT)* which has been developed by the National  
55 Comprehensive Cancer Network (NCCN) is a valid and reliable measure of psychological distress  
56 [52,53]. It consists of a single item with a scale from 0 (“no distress”) to 10 (“extreme distress”),  
57 illustrated by a thermometer and a list of 36 potential problems which can cause distress



(rationed into five categories: practical problems, family problems, emotional problems, spiritual/religious concerns and physical problems; all rated with yes/no). A cut off value of 5 or higher is recommended for a clinically significant level of distress.

The German version of the *Patient Health Questionnaire (PHQ-8)* is a reliable and valid self-report tool for assessing depression [54]. Given that the online intervention is preventive and does not focus on depression or suicidality, the PHQ-8 is used instead of the PHQ-9 to assess depressive symptoms as secondary outcome. In this case the PHQ-8 is an acceptable alternative to the PHQ-9. The sensitivity, specificity and positive predictive value of the PHQ-8 is comparable to the PHQ-9 [55]. The questionnaire asks about impairments of the last two weeks and the items are scored on a 4-point Likert scale from 0 (“not at all”) to 3 (“nearly every day”) with a total range from 0 to 24. Higher values indicate increased severity of symptoms and a cut-off point of  $\geq 10$  is defined for a current depression [54].

The *Generalized Anxiety Disorder Questionnaire (GAD-7)* is a valid and efficient tool for assessing generalized anxiety disorder [56]. Items are scored on a 4-point Likert scale from 0 (“not at all”) to 3 (“nearly every day”), a total score from 0 to 21 is possible. Like for the PHQ-8 a cut-off point of  $\geq 10$  is recommended to screen for generalized anxiety disorder. The reported internal consistency in a German sample is Cronbach  $\alpha = .89$  [57].

Quality of life is assessed with the *Veterans RAND 12-Item Health Survey (VR-12)*, an abbreviated version of the Veterans RAND 36 Items Health Survey (VR-36) which was developed on the basis of the validated SF-36 (Short form 36 health survey) questionnaire [58,59]. The VR-12 consists of different scaled questions (3 point-scale, 5 point-scale and 6 point-scale) with different rating descriptions. The 12 Items can be into two scores: Physical and Mental Health. Standard norms of the summary scores are available for the U.S. population: Mean for physical health summary  $M = 48.60$  ( $SD = 11.1$ ) and for mental health summary  $M = 51.01$  ( $SD = 10.0$ ) [60].

The *Short Version of the Burden Scale for Family Caregivers (BSFC-s)* is used to assess the amount of burden in caregivers [61,62]. The ten items are rated on a scale from 0 (“strongly disagree”) to 3 (“strongly agree”). The score can range from 0 to 30, where higher scores indicate greater caregiver burden. For interpreting the BSFC-s scores a classification system was developed: 0-4 means “none to low” burden, 5-14 means “moderate” burden and 15-30 means “severe to very severe” burden [62]. Cronbach’s alpha for the complete scale is with  $\alpha = .92$  very high [61].

Fear of Progression in spouse caregivers is assessed with the German Version of the *Fear of Progression in Partners of Chronically Ill Patients (FoP-Q-SF/P; German: PA-F-P-KF)* [63]. The 12 items are responded on a five-point Likert Scale from 1 (“not at all”) to 5 (“very much”). The scale

1  
2  
3 will be evaluated through addition of the items, whereupon higher values shows higher fear of  
4 progression. A cut-off with 34 or higher indicates dysfunctional fear of progression. The internal  
5 consistency of the complete scale is high (Cronbach  $\alpha=.87$ ).  
6  
7

8 The *ENRICHED Social Support Inventory (ESSI)* is a short questionnaire to assess the  
9 perceived emotional social support [64,65]. The five items are measured with a five-point scale  
10 (1="at no time" to 5="always") with a minimum of 5 and a maximum of 25. The internal  
11 consistency of the scale is  $\alpha=.89$ . For the definition lack of social support, the value of 18 was  
12 appointed.  
13  
14  
15  
16

17 The received social support is assessed with the three-item *Oslo social support scale (OSS-*  
18 *3)* [66]. The questionnaire consists of three questions with a four-point scale and two five-point  
19 scales with different descriptions. The evaluation is based on the sum score of the raw scores (3  
20 to 14). A score of 3-8 can be interpreted as 'poor support', 9-11 as 'moderate support' and 12-14  
21 as 'strong support' respectively. The internal consistency with  $\alpha=.64$  is acceptable considering the  
22 number of items [67]. While loneliness can be an important challenge for caregivers [68], we  
23 added one question about loneliness to this questionnaire: 'How lonely do you feel at the  
24 moment?' with a five-point-scale from 1="not at all" to 5="very much".  
25  
26  
27  
28  
29  
30

31 The German version of the *Generalized Self-Efficacy scale (GSE, German: SWE)* measures  
32 the perceived self-efficacy [69]. This one-dimensional scale was primary developed for students  
33 and teachers, but is also used in cancer context [70,71]. The 10 Items had a response range from  
34 1 ("not at all true") to 4 ("exactly true"). The internal consistency is  $\alpha=.86$  and the validity is  
35 confirmed by numerous findings [72].  
36  
37  
38  
39

40 Coping is assessed with the German Version of the *BriefCOPE (Brief Coping Orientation to*  
41 *Problems Experienced) Inventory* [73,74]. It consists of 28 items which are rated on a four-point  
42 Likert-Scale ranged from 1 ("not at all") to 4 ("very much"). The questionnaire is divided in 14  
43 subscales, each represented by two items. The internal consistency for the subscales range from  
44  $\alpha=.50$  to  $\alpha=.90$ .  
45  
46  
47

48 \*\*\* Please insert table 3 about here \*\*\*  
49

## 50 Patient and public involvement

51  
52 Psycho oncologists were involved by valuing the main sessions of PartnerCARE. Patients or public  
53 were not further involved in design or procedure of the study. Feedback from participants of the  
54 feasibility study will be used to further optimize the online intervention for the following  
55 effectivity evaluation study. We intend to disseminate the main results of the feasibility study with  
56 a short report at suitable platforms where partners of patients with cancer are reached (e.g. online  
57 communities).  
58  
59  
60



## Statistical analysis

Demographic data will be reported using descriptive statistics. A chart of participant flow during the whole study will be plotted. Quantity of drop-out and reasons for drop-out will be displayed. With basic psychometric analyses the scale structure and internal consistency of the used questionnaires will be verified. Chi-square (for categorical variables) and t-tests will be performed to analyse whether randomization lead to comparable groups with no significant differences at baseline. Before starting with the analyses, we examine if the data is normally distributed, else we will use a non-parametric test. The significance level for all analyses will be  $p \leq .05$ .

All statistical analyses will be performed based on the intention-to-treat principle with multiple imputations to replace missing data. Per-protocol analyses for the considerably completers will be additionally conducted to investigate the influence of intervention attrition on study results.

Qualitative individual feedback from participants via the Minddistrict platform regarding to the feasibility and acceptance of the online intervention will be summarized. Feasibility measurements from the online questionnaire will be analysed descriptive (INEP-On; drop-out) and with t-test (APOI; CSQ-I (only in IG)).

To test a potential intervention effect, i.e. an indication for the potential efficacy of PartnerCARE, continuous outcome parameters at post-treatment (T1) will be analysed using an analyses of covariance (ANCOVA), controlling for the baseline measurement (T0) and further covariates (e.g. age, sex). For follow-up (T2) effects a repeated measure analyses of covariance will be conducted with time as the within-subject factor (baseline vs. post-treatment vs. follow-up) and group as the between subject-factor (IG vs. CG). In the case of a significant main effect, post hoc tests will be conducted to analyse between which measurement points the significant differences exist. Cohen's d will be calculated to report effect sizes (effect sizes smaller than .32 are considered small, .33-.55 are considered moderate, and those larger than .56 are considered large [75]).

## Discussion

Partners of patients with cancer are confronted with a variety of challenges and new, additional tasks regarding the disease, resulting in a decrease of mental health. These burdens are often overlooked and psycho-oncological support or specific interventions for partners are rare. The online intervention PartnerCARE was developed to provide tailored support for partners of patients with cancer. The main propose of the feasibility study is to evaluate the feasibility and acceptance of PartnerCARE and of the study process itself through a randomized controlled trial. Furthermore, we aim at gaining first preliminary evidence for the potential efficacy of the online

1  
2  
3 intervention which is hoped to pave the way for a comprehensive effectivity evaluation study. An  
4 online intervention is, from our point of view, particularly suitable for partners because of the  
5 flexibility (time and place independency), easy accessibility, possible anonymity and low-  
6 threshold format. We expect that the online intervention facilitates access to psychosocial services  
7 for partners with hitherto low utilization of conventional face-to-face psychosocial care (e.g.  
8 because of logistic and time reasons, discomfort or other objections towards psychosocial services  
9 or gender-related reasons). Although to date there is evidence that the majority of online  
10 intervention users are female [16], we assume that online interventions could suit particularly for  
11 male caregivers, because of their tendency to have to be strong (no public searching for help) and  
12 their potential difficulties to express their concerns and emotions (could be easier for them in an  
13 online setting) [10]. Definitely more research is needed to investigate to better reach male  
14 participants for online interventions.  
15  
16  
17  
18  
19  
20  
21  
22

23 Recruitment of partners of patients with cancer can be challenging due to the fact that partners  
24 are often busy and therefore not reached at the clinic, recruitment via patient is not always  
25 effective (information is not passed to the partner) and there are not many typical areas where  
26 partners can be reached. Recruitment rates for caregivers of cancer patients tended to be poor  
27 and varied from 20% to 66% [17]. To overcome the challenges of recruitment we try to use a wide  
28 variety of online and offline recruitment strategies and will evaluate their adequacy.  
29  
30  
31  
32

33 PartnerCARE is the first online interventions for partners of patients with cancer available in  
34 German language. The newly developed online intervention for partners of patients with cancer  
35 is adjusted to the needs of cancer caregivers and takes several persuasive principles into account.  
36 The online intervention uses a variety of different elements (relevant topics, varying exercises,  
37 practical tips, audio imaginations) to motivate participants to go on with the intervention. If the  
38 pilot study verifies the feasibility and acceptance of PartnerCARE it is conceivable to translate  
39 PartnerCARE in different languages and evaluate the online intervention in further studies  
40 worldwide.  
41  
42  
43  
44  
45  
46

47 With this pilot study we will initiate a continuous development and evaluation process of the  
48 online intervention PartnerCARE. During the online intervention we assess satisfaction, positive  
49 and negative estimations of the intervention via written feedback. These insights from partners  
50 of persons with cancer will be used to improve and further develop PartnerCARE to an even more  
51 user tailored intervention. We also will assess possible negative effects in our RCT, to evaluate  
52 potential side effects of the online intervention for partners. The measurement of e-coach time for  
53 feedback every week and quantity of sent reminders will give a first insight in the estimation of  
54 costs for the online intervention for implementation in usual health care. If the following  
55 effectivity evaluation study (with a planned three-arm trial: guided PartnerCARE vs. automatic  
56  
57  
58  
59  
60

1  
2  
3 guided PartnerCARE vs. CG) may show that automatic feedback is similar effective than human  
4 feedback, PartnerCARE could be even more easily offered and with lower cost for the health care  
5 system. But there will be still the need for an intervention manager with an overview over all  
6 processes and an alert if suicidal ideation is expressed from participants. Additionally, more  
7 research about effects of unguided interventions in RCTs vs. effects of unguided interventions in  
8 real world is needed [76].  
9  
10  
11  
12

13 A few limitations need to be taken into consideration. As all outcomes are assessed via self-report  
14 and the contact with participants is only online, there is uncertainty regarding the identity of the  
15 participants. With signed informed consent and control questions with automatic premature  
16 termination at the first online assessment this problem will be reduced. Online interventions in  
17 general and online interventions specifically for caregivers have to face with high dropout rates  
18 (29% to 38%) [77,78]. To reduce a potential adherence problem and to enhance motivation the  
19 participants of the intervention group are accompanied by an e-coach with feedback and  
20 reminders [46,79] and the development of the online design includes persuasive elements [41].  
21 As participation in the study is only possible with access to internet and some technical affinity,  
22 we designed the online intervention as simple and intuitive as possible and offer technical use  
23 basics at the introduction session. Furthermore, it has been discussed that including a waitlist  
24 control condition leads to an overestimation of the effect sizes compared to a no treatment or  
25 psychological placebo condition [80]. However, all participants in our study are free to use care  
26 as usual and they receive a list of other treatment options like cancer counselling centres if they  
27 are interested. In addition, we are able to have a look on possible long-term effects (4-month  
28 follow up), but this leads to a long waiting time for the waitlist control group. While the feasibility  
29 study used guided feedback in the IG and automated feedback in the CG, further research is needed  
30 to investigate whether guided, automatic guided or unguided versions of online interventions  
31 have different impacts on the participant's outcomes. Two studies show that human and  
32 automated support accomplish similar participant adherence and effectiveness of the online  
33 intervention [81,82]. To further investigate this effect, the following effectivity evaluation study  
34 could be a three-arm randomized trial with PartnerCARE with human feedback, PartnerCARE  
35 with automated feedback and a treatment as usual (TAU) control group. In addition, our online  
36 intervention for partners could not cover all relevant topics: A recent study showed 'home care  
37 interventions', 'impact of financial demands on caregiver', 'impact of health reforms, programs and  
38 policies on caregivers' as some of the most important topics for caregivers [83]. The further  
39 development of PartnerCARE should take these insights into account.  
40  
41  
42  
43  
44  
45  
46  
47  
48  
49  
50  
51  
52  
53  
54  
55  
56

57 Regarding the future outlook, PartnerCARE could be included into the health care routine: by the  
58 time a patient becomes diagnosed with cancer, also the partner should be screened for psycho-  
59 social and physical burdens. PartnerCARE can also provide a communicative benefit for health  
60

1  
2  
3 care professionals with enhanced awareness of caregivers and the opportunity of having a special  
4 offer for partners. If needed, PartnerCARE could be immediately offered as a tool for partners to  
5 work on their burdens regardless of where and when. It can also be used to overcome the waiting  
6 time for partners until a local psycho-oncological treatment is available.  
7  
8  
9

## 10 11 12 **Abbreviations**

13  
14 ABE: Anonymity Benefits (Subscale of APOI); ANOVA: Analysis of Variance; APOI: Attitudes  
15 towards Psychological Online Interventions Questionnaire; BriefCOPE: Brief Coping Orientation  
16 to Problems Experienced Inventory; BSFC-s: Short Version of the Burden Scale for Family  
17 Caregivers; CCC: Comprehensive Cancer Center; CG: Waitlist control group; CON: Confidence in  
18 Effectiveness (Subscale of APOI); CONSORT: Consolidated Standards of Reporting Trials; CSQ-I:  
19 Client Satisfaction Questionnaire adapted to Internet-based interventions; DT: National  
20 Comprehensive Cancer Network Distress Thermometer; ESSI: ENRICHED Social Support  
21 Inventory; FoP-Q-SF/P: Fear of Progression in Partners of Chronically ill Patients; GAD-7:  
22 Generalized Anxiety Disorder Questionnaire; GSE: Generalized Self-Efficacy scale; IG: Intervention  
23 group; INEP-On/-CG: Inventory for the Assessment of Negative Effects in Psychotherapy –  
24 Online/-Control group; NCCN: National Comprehensive Cancer Network; OSS-3: Oslo social  
25 support scale; PHQ-8/9: Patient Health Questionnaire; RCT: Randomized controlled trial; SCE:  
26 Scepticism and Perception of Risk (Subscale of APOI); SF-36: Short form 36 health survey  
27 questionnaire; SMS: Short Message Service; SPIRIT: Standard Protocol Items: Recommendations  
28 for Interventional Trials; TAU: Treatment as usual; TET: Technologization Threat (Subscale of  
29 APOI); VR-12: Veterans RAND 12-Item Health Survey; VR-36: Veterans RAND 36 Items Health  
30 Survey  
31  
32  
33  
34  
35  
36  
37  
38  
39  
40  
41  
42

## 43 **Declarations**

### 44 **Ethics approval and consent to participate**

45  
46 This study was approved by the Ethics Committee of the University of Ulm (no. 390/18) and was  
47 registered in the German Clinical Trials Register ([DRKS00017019](https://www.drks.org/DRKS00017019)) on 08 April 2019. In case of  
48 important protocol modifications, trial registration will be updated. All participants receive  
49 written information about study process, data security and voluntariness of participation. Prior  
50 to the involvement into the study participants have to confirm understanding of the given  
51 information with written consent. Data collection occur pseudonymized by giving every  
52 participant a personal ID and data is stored password protected. Access to study data will only be  
53 given to authorized study members. After data collection all personal information of participants  
54 will be deleted.  
55  
56  
57  
58  
59  
60

### **Consent for publication**

Not applicable.

### **Availability of data and materials**

All principal investigators will be given full access to the data sets. Data set will be stored on password-protected servers of Ulm University with restricted access. External researches may get access to the final trial dataset on request depending on to be specified data security and data exchange regulation agreements. To ensure confidentiality, data dispersed to any investigator or researcher will be blinded of any identifying participant information.

### **Competing interests**

The authors declare that they have no competing interests.

### **Funding**

This work was supported by a grant from the German Cancer Aid to the Comprehensive Cancer Center Ulm (grant number: 70112209). The German Cancer Aid had no role in study design, decision to publish or preparation of this manuscript. The German Cancer Aid will not be involved in data collection, analyses, decision to publish or preparation of future papers regarding the PartnerCARE project.

### **Author contributions**

DB, HG, HB and KH contributed to the study design. DB and IL compiled the content of the intervention sessions. The online design and structure of the intervention was carried out from DB building on prior online interventions of the department of Clinical Psychology and Psychotherapy (HB). Intervention development was supervised by HG, HB and KH. DB is responsible for recruitment and coordination of the study. DB drafted the manuscript. All authors provided critical revision and approved the final manuscript.

### **Acknowledgements**

Authors would like to thank Sabrina Heil for her engagement in enrolling participants and for her support in study organization. Furthermore, authors thank Daniel Neveling for his support as e-coach and Miriam Stock for providing the imaginative audio files. Authors also thank Eileen Bendig for her supporting role in planning the trial process, Ann-Marie Kuechler for her support at the Minddistrict Platform as well as Robin Kraft and Sebastian Broetzler for creating the PartnerCARE homepage. Special thanks go to the psycho oncologists who valued the PartnerCARE sessions and thus support the enhancement of the intervention.

## References

- 1 Li QP, Mak YW, Loke AY. Spouses' experience of caregiving for cancer patients: A literature review. *Int Nurs Rev* 2013;**60**:178–87.
- 2 Popek V, Hönig K. Cancer and family: tasks and stress of relatives. *Nervenarzt* 2015;**86**:266–8.
- 3 Pitceathly C, Maguire P. The psychological impact of cancer on patients' partners and other key relatives: A review. *Eur J Cancer* 2003;**39**:1517–24.
- 4 Stenberg U, Ruland C, Miaskowski C. Review of the literature on the effects of caring for a patient with cancer. *Psychooncology* 2010;**19**:1013–25.
- 5 Goren A, Gilloteau I, Lees M, *et al.* Quantifying the burden of informal caregiving for patients with cancer in Europe. *Support Care Cancer* 2014;**22**:1637–46.
- 6 Bergelt C, Koch U, Petersen C. Quality of life in partners of patients with cancer. *Qual Life Res* 2008;**17**:653–63.
- 7 Mitchell AJ, Ferguson DW, Gill J, *et al.* Depression and anxiety in long-term cancer survivors compared with spouses and healthy controls: A systematic review and meta-analysis. *Lancet Oncol* 2013;**14**:721–32.
- 8 Sklenarova H, Krümpelmann A, Haun MW, *et al.* When do we need to care about the caregiver? Supportive care needs, anxiety, and depression among informal caregivers of patients with cancer and cancer survivors. *Cancer* 2015;**121**:1513–9.
- 9 Rosenberger C, Höcker A, Cartus M, *et al.* Outpatient Psycho-Oncological Care for Family Members and Patients: Access, Psychological Distress and Supportive Care Needs. *PPmP Psychother Psychosom Medizinische Psychol* 2012;**62**:185–94.
- 10 Lopez V, Copp G, Molassiotis A. Male Caregivers of Patients With Breast and Gynecologic Cancer. *Cancer Nurs* 2012;**35**:402–10.
- 11 Northouse L, Katapodi M, Song L, *et al.* Interventions with family caregivers of cancer patients: Meta-Analysis of randomized trials. *CA Cancer J Clin* 2011;**60**:317–39.
- 12 Applebaum AJ, Breitbart W. Care for the cancer caregiver : A systematic review. *Palliat Support Care* 2013;**11**:231–52.
- 13 Kleine A-K, Hallensleben N, Mehnert A, *et al.* Psychological interventions targeting partners of cancer patients: A systematic review. *Crit Rev Oncol Hematol* 2019;**140**:52–66.
- 14 O'Toole MS, Zachariae R, Renna ME, *et al.* Cognitive behavioral therapies for informal caregivers of patients with cancer and cancer survivors: a systematic review and meta-analysis. *Psychooncology* 2017;**26**:428–37.
- 15 Ugalde A, Gaskin CJ, Rankin NM, *et al.* A systematic review of cancer caregiver interventions: Appraising the potential for implementation of evidence into practice. *Psychooncology* 2019;**28**:687–701.
- 16 Kaltenbaugh J. D, Klem Lou M, Hu L, *et al.* Using Web-Based Interventions to Support Caregivers of Patients With Cancer: A Systematic Review. *Oncol Nurs Forum* 2015;**42**:156–64.
- 17 Heynsbergh N, Heckel L, Botti M, *et al.* Feasibility, useability and acceptability of technology-based interventions for informal cancer carers: A systematic review. *BMC Cancer* 2018;**18**:244.
- 18 Sin J, Henderson C, Spain D, *et al.* eHealth interventions for family carers of people with



- 1  
2  
3 long term illness: A promising approach? *Clin Psychol Rev* 2018;**60**:109–25.  
4  
5 19 Griffiths F, Lindenmeyer A, Powell J, *et al.* Why are health care interventions delivered  
6 over the internet? A systematic review of the published literature. *J Med Internet Res*  
7 2006;**8**.  
8  
9 20 Heynsbergh N, Botti M, Heckel L, *et al.* Caring for the person with cancer and the role of  
10 digital technology in supporting carers. *Support Care Cancer* 2018;:1–7.  
11  
12 21 Köhle N, Drossaert CHC, Van Uden-Kraan CF, *et al.* Intent to use a web-based  
13 psychological intervention for partners of cancer patients: Associated factors and  
14 preferences. *J Psychosoc Oncol* 2018;**36**:203–21.  
15  
16 22 Köhle N, Drossaert CH, Oosterik S, *et al.* Needs and Preferences of Partners of Cancer  
17 Patients Regarding a Web-Based Psychological Intervention: A Qualitative Study. *JMIR*  
18 *Cancer* 2015;**1**:e13.  
19  
20 23 Bundesministerium für Gesundheit. Nationaler Krebsplan: Handlungsfelder, Ziele,  
21 Umsetzungsempfehlungen und Ergebnisse.  
22 2017.[https://www.bundesgesundheitsministerium.de/fileadmin/Dateien/5\\_Publikationen/Praevention/Broschueren/Broschuere\\_Nationaler\\_Krebsplan.pdf](https://www.bundesgesundheitsministerium.de/fileadmin/Dateien/5_Publikationen/Praevention/Broschueren/Broschuere_Nationaler_Krebsplan.pdf) (accessed 5 Jun  
23 2019).  
24  
25 24 Leitlinienprogramm Onkologie (Deutsche Krebsgesellschaft, Deutsche Krebshilfe,  
26 AWMF): Psychoonkologische Diagnostik, Beratung und Behandlung von erwachsenen  
27 Krebspatienten, Langversion 1.1. 2014.[https://www.leitlinienprogramm-](https://www.leitlinienprogramm-onkologie.de/fileadmin/user_upload/Downloads/Leitlinien/Psychoonkologieleitlinie_1.1/LL_PSO_Langversion_1.1.pdf)  
28 [onkologie.de/fileadmin/user\\_upload/Downloads/Leitlinien/Psychoonkologieleitlinie\\_1.1](https://www.leitlinienprogramm-onkologie.de/fileadmin/user_upload/Downloads/Leitlinien/Psychoonkologieleitlinie_1.1/LL_PSO_Langversion_1.1.pdf)  
29 [/LL\\_PSO\\_Langversion\\_1.1.pdf](https://www.leitlinienprogramm-onkologie.de/fileadmin/user_upload/Downloads/Leitlinien/Psychoonkologieleitlinie_1.1/LL_PSO_Langversion_1.1.pdf) (accessed 5 Jun 2019).  
30  
31 25 Schulz H, Bleich C, Bokemeyer C, *et al.* Psychoonkologische Versorgung in Deutschland :  
32 Bundesweite Bestandsaufnahme und Analyse. 2018.  
33 [https://www.bundesgesundheitsministerium.de/fileadmin/Dateien/5\\_Publikationen/Gesundheit/Berichte/PsoViD\\_Gutachten\\_BMG\\_19\\_02\\_14\\_gender.pdf](https://www.bundesgesundheitsministerium.de/fileadmin/Dateien/5_Publikationen/Gesundheit/Berichte/PsoViD_Gutachten_BMG_19_02_14_gender.pdf)  
34  
35 26 Mehnert A, Koranyi S. Psychooncological Care: A Challenge. *Dtsch Medizinische*  
36 *Wochenschrift* 2018;**143**:316–23.  
37  
38 27 Northouse LL, Schafenacker A, Barr KLC, *et al.* A tailored Web-based psychoeducational  
39 intervention for cancer patients and their family caregivers. *Cancer Nurs* 2014;**37**:321–  
40 30.  
41  
42 28 Song L, Rini C, Deal AM, *et al.* Improving couples' quality of life through a Web-based  
43 prostate cancer education intervention. *Oncol Nurs Forum* 2015;**42**:183–92.  
44  
45 29 Scott K, Beatty L. Feasibility study of a self-guided cognitive behaviour therapy internet  
46 intervention for cancer carers. *Aust J Prim Health* 2013;**19**:270–4.  
47  
48 30 Applebaum AJ, Buda KL, Schofield E, *et al.* Exploring the cancer caregiver's journey  
49 through web-based Meaning-Centered Psychotherapy. *Psychooncology* 2018;**27**:847–56.  
50  
51 31 Duggleby W, Ghosh S, Struthers-Montford K, *et al.* Feasibility Study of an Online  
52 Intervention to Support Male Spouses of Women With Breast Cancer. *Oncol Nurs Forum*  
53 2017;**44**:765–75.  
54  
55 32 Levesque J V., Gerges M, Girgis A. The development of an online intervention (Care Assist)  
56 to support male caregivers of women with breast cancer: A protocol for a mixed methods  
57 study. *BMJ Open* 2018;**8**:7–9.  
58  
59 33 Köhle N, Drossaert CH, Schreurs KM, *et al.* A web-based self-help intervention for partners  
60 of cancer patients based on Acceptance and Commitment Therapy: a protocol of a

- 1  
2  
3 randomized controlled trial. *BMC Public Health* 2015;**15**:303.
- 4  
5 34 Eldridge S, Chan C, Campbell M, *et al.* CONSORT 2010 statement: extension to randomized  
6 pilot and feasibility trials. *Pilot feasibility Stud* 2016;**2**:64–96.
- 7  
8 35 Proudfoot J, Klein B, Barak A, *et al.* Establishing guidelines for executing and reporting  
9 internet intervention research. *Cogn Behav Ther* 2011;**40**:82–97.
- 10  
11 36 Chan A, Tetzlaff JM, Altman DG, *et al.* SPIRIT 2013 Statement : Defining Standard Protocol  
12 Items for Clinical Trials. *Ann Intern Med* 2013;**158**:200–7.
- 13  
14 37 Weis J, Heckl U, Brocai D, *et al.* *Psychoedukation mit Krebspatienten - Therapiemanual für  
15 eine strukturierte Gruppenintervention.* Stuttgart: : Schattauer 2006.
- 16  
17 38 Lin J, Paganini S, Sander L, *et al.* An Internet-Based Intervention for Chronic Pain. *Dtsch  
18 Aerzteblatt Online* 2017;**114**:681–8.
- 19  
20 39 Oinas-Kukkonen H, Harjumaa M. Persuasive systems design: Key issues, process model,  
21 and system features. *Commun Assoc Inf Syst* 2009;**24**:485–500.
- 22  
23 40 Kelders SM, Kok RN, Ossebaard HC, *et al.* Persuasive system design does matter: A  
24 systematic review of adherence to web-based interventions. *J Med Internet Res*  
25 2012;**14**:e152.
- 26  
27 41 Baumeister H, Kraft R, Baumel A, *et al.* Persuasive e-health design for behavior change. In:  
28 Baumeister H, Montag C, eds. *Digital Phenotyping and Mobile Sensing: New Developments  
29 in Psychoinformatics.* Berlin: : Springer 2019.
- 30  
31 42 Jaspers MWM, Steen T, Bos C Van Den, *et al.* The think aloud method: A guide to user  
32 interface design. *Int J Med Inform* 2004;**73**:781–95.
- 33  
34 43 Geuenich K. *Krebs gemeinsam bewältigen - Wie Angehörige durch Achtsamkeit Ressourcen  
35 stärken.* Stuttgart: : Schattauer 2014.
- 36  
37 44 Andersson G, Carlbring P, Berger T, *et al.* What makes internet therapy work? *Cogn Behav  
38 Ther* 2009;**38**:55–60.
- 39  
40 45 Mohr DC, Cuijpers P, Lehman K. Supportive accountability: A model for providing human  
41 support to enhance adherence to eHealth interventions. *J Med Internet Res* 2011;**13**:1–11.
- 42  
43 46 Baumeister H, Reichler L, Munzinger M, *et al.* The impact of guidance on Internet-based  
44 mental health interventions - A systematic review. *Internet Interv* 2014;**1**:205–15.
- 45  
46 47 Eckert M, Ebert DD, Lehr D, *et al.* Does SMS-support make a difference? Effectiveness of a  
47 two-week online-training to overcome procrastination. A randomized controlled trial.  
48 *Front Psychol* 2018;**9**:1–13.
- 49  
50 48 Viechtbauer W, Smits L, Kotz D, *et al.* A simple formula for the calculation of sample size in  
51 pilot studies. *J Clin Epidemiol* 2015;**68**:1375–9.
- 52  
53 49 Boß L, Lehr D, Reis D, *et al.* Reliability and validity of assessing user satisfaction with web-  
54 based health interventions. *J Med Internet Res* 2016;**18**:e234.
- 55  
56 50 Ladwig I, Rief W, Nestoriuc Y. What Are the Risks and Side Effects of Psychotherapy? –  
57 Development of an Inventory for the Assessment of Negative Effects of Psychotherapy  
58 (INEP). *Verhaltenstherapie* 2014;**24**:252–63.
- 59  
60 51 Schröder J, Sautier L, Kriston L, *et al.* Development of a questionnaire measuring Attitudes  
61 towards Psychological Online Interventions-the APOI. *J Affect Disord* 2015;**187**:136–41.
- 52  
62 52 Mehnert A, Müller D, Lehmann C, *et al.* Die deutsche Version des NCCN Distress-  
63 Thermometers: Empirische Prüfung eines Screening-Instruments zur erfassung



- 1  
2  
3 psychosozialer Belastung bei Krebspatienten. *Zeitschrift für Psychiatr Psychol und*  
4 *Psychother* 2006;**54**:213–23.  
5  
6 53 Roth AJ, Kornblith AB, Batel-Copel L, *et al.* Rapid screening for psychologic distress in men  
7 with prostate carcinoma: A pilot study. *Cancer* 1998;**82**:1904–8.  
8  
9 54 Kroenke K, Strine TW, Spitzer RL, *et al.* The PHQ-8 as a measure of current depression in  
10 the general population. *J Affect Disord* 2009;**114**:163–73.  
11  
12 55 Kroenke K, Spitzer RL. The PHQ-9: A New Depression Diagnostic and Severity Measure.  
13 *Psychiatr Ann* 2002;**32**:509–15.  
14  
15 56 Robert L Spitzer, Kurt Kroenke, Janet B W Williams, *et al.* A Brief Measure for Assessing  
16 Generalized Anxiety Disorder. *Arch Intern Med* 2006;**166**:1092–7.  
17  
18 57 Löwe B, Decker O, Müller S, *et al.* Validation and standardization of the Generalized  
19 Anxiety Disorder Screener (GAD-7) in the general population. *Med Care* 2008;**46**:266–74.  
20  
21 58 Iqbal SU, Rogers W, Selim A, *et al.* The Veterans RAND 12 Item Health Survey (VR-12):  
22 What It Is and How It Is Used. *CHQOERs VA Med Center CAPP Bost Univ Sch Public Heal*  
23 *Bedford* 2007;;1–12.  
24  
25 59 Kazis LE, Miller DR, Clark JA, *et al.* Improving Response Choices on the Veterans SF-36  
26 Health Survey Role Functioning Scales. *J Ambul Care Manag* 2004;**27**:263–80.  
27  
28 60 Selim AJ, Rogers W, Fleishman JA, *et al.* Updated U.S. population standard for the Veterans  
29 RAND 12-item Health Survey (VR-12). *Qual Life Res* 2009;**18**:43–52.  
30  
31 61 Graessel E, Berth H, Lichte T, *et al.* Subjective caregiver burden: Validity of the 10-item  
32 short version of the Burden Scale for Family Caregivers BSFC-s. *BMC Geriatr* 2014;**14**:1–9.  
33  
34 62 Pendergrass A, Malnis C, Graf U, *et al.* Screening for caregivers at risk: Extended validation  
35 of the short version of the Burden Scale for Family Caregivers (BSFC-s) with a valid  
36 classification system for caregivers caring for an older person at home. *BMC Health Serv*  
37 *Res* 2018;**18**:1–9.  
38  
39 63 Zimmermann T, Herschbach P, Wessargues M, *et al.* Fear of Progression in Partners of  
40 Chronically Ill Patients. *Behav Med* 2011;**37**:37–41.  
41  
42 64 Kendel F, Spaderna H, Sieverding M, *et al.* Eine deutsche Adaptation des ENRICHD Social  
43 Support Inventory ( ESSI ). *Diagnostica* 2011;**57**:99–106.  
44  
45 65 Cordes A, Herrmann-Lingen C, Büchner B, *et al.* Repräsentative Normierung des  
46 ENRICHD-Social-Support-Instrument (ESSI) - Deutsche Version. *Klin Diagnostik und Eval*  
47 *2009*;**1**:16–32.  
48  
49 66 Dalgard OS, Dowrick C, Lehtinen V, *et al.* Negative life events , social support and gender  
50 difference in depression. *Soc Psychiatry Psychiatr Epidemiol* 2006;**41**:444–51.  
51  
52 67 Kocalevent RD, Berg L, Beutel ME, *et al.* Social support in the general population:  
53 Standardization of the Oslo social support scale (OSSS-3). *BMC Psychol* 2018;**6**:4–11.  
54  
55 68 Vasileiou K, Barnett J, Barreto M, *et al.* Experiences of loneliness associated with being an  
56 informal caregiver: A qualitative investigation. *Front Psychol* 2017;**8**:585.  
57  
58 69 Jerusalem M, Schwarzer R. *Skalen zur Erfassung von Lehrer- und Schülermerkmalen.*  
59 *Dokumentation der psychometrischen Verfahren im Rahmen der Wissenschaftlichen*  
60 *Begleitung des Modellversuchs Selbstwirksame Schulen.* Berlin: : Freie Universität Berlin  
1999.  
70  
Luszczynska A, Scholz U, Schwarzer R. The Gernerall Self-Efficacy Scale: Multicultural

- 1  
2  
3 Validation Studies. *J Psychol* 2005;**139**:439–57.
- 4  
5 71 Mystakidou K, Parpa E, Panagiotou I, *et al.* Caregivers' anxiety and self-efficacy in  
6 palliative care. *Eur J Cancer Care (Engl)* 2013;**22**:188–95.
- 7  
8 72 Scholz U, Gutierrez-Dona B, Sud S, *et al.* Is General Self-Efficacy a Universal Construct ?  
9 Psychometric Findings from 25 Countries. *Eur J Psychol Assess* 2002;**18**:242–51.
- 10  
11 73 Charles S. Carver. You Want to Measure Coping But Your Protocol's Too Long: Consider  
12 the Brief COPE. *Int J Behav Med* 1997;**4**:92–100.
- 13  
14 74 Knoll N, Rieckmann N, Schwarzer R. Coping as a mediator between personality and stress  
15 outcomes: A longitudinal study with cataract surgery patients. *Eur J Pers* 2005;**19**:229–  
16 47.
- 17  
18 75 Lipsey MW, Wilson DB. The efficacy of psychological educational, and behavioral  
19 treatment: Confirmation from meta-analysis. *Am Psychol* 1993;**48**:1181–209.
- 20  
21 76 Lin J, Faust B, Ebert DD, *et al.* A web-based acceptance-facilitating intervention for  
22 identifying patients' acceptance, uptake, and adherence of internet- and mobile-based  
23 pain interventions: Randomized controlled trial. *J Med Internet Res* 2018;**20**:1–18.
- 24  
25 77 Melville KM, Casey LM, Kavanagh DJ. Dropout from internet-based treatment for  
26 psychological disorders. *Br J Clin Psychol* 2010;**49**:455–71.
- 27  
28 78 Tang WPY, Chan CWH, So WKW, *et al.* Web-based interventions for caregivers of cancer  
29 patients : A review of literatures. *Asia-Pacific Journal Oncol Nurs* 2014;**1**:9–15.
- 30  
31 79 Fry JP, Neff RA. Periodic prompts and reminders in health promotion and health behavior  
32 interventions: Systematic review. *J Med Internet Res* 2009;**11**:1–15.
- 33  
34 80 Furukawa TA, Noma H, Caldwell DM, *et al.* Waiting list may be a nocebo condition in  
35 psychotherapy trials: A contribution from network meta-analysis. *Acta Psychiatr Scand*  
36 2014;**130**:181–92.
- 37  
38 81 Kelders SM, Bohlmeijer ET, Pots WTM, *et al.* Comparing human and automated support  
39 for depression: Fractional factorial randomized controlled trial. *Behav Res Ther*  
40 2015;**72**:72–80.
- 41  
42 82 Mira A, Bretón-López J, García-Palacios A, *et al.* An Internet-based program for depressive  
43 symptoms using human and automated support: a randomized controlled trial.  
44 *Neuropsychiatr Dis Treat* 2017;**13**:987–1006.
- 45  
46 83 Lambert SD, Ould Brahim L, Morrison M, *et al.* Priorities for caregiver research in cancer  
47 care: an international Delphi survey of caregivers, clinicians, managers, and researchers.  
48 *Support Care Cancer* 2019;**27**:805–17.
- 49  
50 84 Lambert SD, Harrison JD, Smith E, *et al.* The unmet needs of partners and caregivers of  
51 adults diagnosed with cancer: a systematic review. *BMJ Support Palliat Care* 2012;**2**:224–  
52 30.
- 53  
54 85 Marcotte J, Tremblay D, Turcotte A, *et al.* Needs-focused interventions for family  
55 caregivers of older adults with cancer: a descriptive interpretive study. *Support Care*  
56 *Cancer* 2019;**27**:2771–81.
- 57  
58 86 Skalla KA, Lavoie Smith EM, Li Z, *et al.* Multidimensional needs of caregivers for patients  
59 with cancer. *Clin J Oncol Nurs* 2013;**17**:500–6.
- 60

## Appendix

Table 1 Overview of needs of cancer caregivers

| Needs of caregivers                                                                                                             | Literature      |
|---------------------------------------------------------------------------------------------------------------------------------|-----------------|
| Information (e.g. illness and treatment, providing care, death and dying)                                                       | [8,22,84,85]    |
| Comprehensive cancer care (e.g. contact with healthcare professionals, knowledge of available services, help in patients' care) | [8,20,84,85]    |
| Emotional and psychological support (e.g. sleep disturbances, depression, anxiety, fatigue, weight gain)                        | [8,22,84,86]    |
| Impact in daily life (e.g. financial, uncertainty, looking after own health, balance own needs with needs of patient)           | [8,20,22,84-86] |
| Relationship (e.g. communication, sexuality)                                                                                    | [8,22,84]       |
| Spirituality                                                                                                                    | [84,86]         |
| Optional peer support                                                                                                           | [22]            |

Figure 1 Flow diagram of the study procedure

See separate File "PartnerCARE\_Figure 1 Flow diagram.docx"

Table 2 Structure and content of the PartnerCARE sessions

| Sessions                      | Content                                                                                                                                                                         | Aim                                                                                                                                                    |
|-------------------------------|---------------------------------------------------------------------------------------------------------------------------------------------------------------------------------|--------------------------------------------------------------------------------------------------------------------------------------------------------|
| Introduction                  | <ul style="list-style-type: none"> <li>- technical issues/functions</li> <li>- overview of the training</li> </ul>                                                              |                                                                                                                                                        |
| <b>Main sessions</b>          |                                                                                                                                                                                 |                                                                                                                                                        |
| 1. Specific burdens           | <ul style="list-style-type: none"> <li>- specific burdens of partners</li> <li>- identification of resources</li> <li>- plan for positive activities</li> </ul>                 | <ul style="list-style-type: none"> <li>- awareness of burdens and own resources</li> </ul>                                                             |
| 2. Inner drivers              | <ul style="list-style-type: none"> <li>- identification, interpretation and meaning of personal drivers</li> <li>- giving yourself permissions</li> </ul>                       | <ul style="list-style-type: none"> <li>- recognizing and down-scaling of excessive expectations on the own person to facilitate daily life</li> </ul>  |
| 3. Partnership communication  | <ul style="list-style-type: none"> <li>- basic rules of successful communication (non-verbal, gender differences)</li> <li>- communication in the context of disease</li> </ul> | <ul style="list-style-type: none"> <li>- improve open communication between partner and patient</li> </ul>                                             |
| 4. Handling negative feelings | <ul style="list-style-type: none"> <li>- focus on anxiety</li> <li>- mindfulness as strategy to deal with anxiety</li> </ul>                                                    | <ul style="list-style-type: none"> <li>- reduction of dysfunctional coping and regain of control</li> </ul>                                            |
| 5. Control and acceptance     | <ul style="list-style-type: none"> <li>- discrimination between things which are controllable or should be accepted</li> <li>- enjoyment in everyday life</li> </ul>            | <ul style="list-style-type: none"> <li>- awareness of dysfunctional control</li> <li>- awareness of little positive things in everyday life</li> </ul> |
| 6. Paths and goals            | <ul style="list-style-type: none"> <li>- further support offers</li> <li>- reflection of the training</li> <li>- outlook: next steps / goals</li> </ul>                         | <ul style="list-style-type: none"> <li>- motivation of the partner to be his own trainer</li> </ul>                                                    |
| Booster session               | <ul style="list-style-type: none"> <li>- repetition of two basis elements of the training:</li> </ul>                                                                           | <ul style="list-style-type: none"> <li>- consolidation of training content</li> </ul>                                                                  |

|                                     |                                                                                       |                                                                                                     |
|-------------------------------------|---------------------------------------------------------------------------------------|-----------------------------------------------------------------------------------------------------|
|                                     | activity plan and open communication                                                  |                                                                                                     |
| <b>Optional additional sessions</b> |                                                                                       |                                                                                                     |
| Support of own children             | - burdens of children<br>- suggestions for a conversation about the disease/situation | - support with communication with children                                                          |
| Healthy sleep                       | - rules for healthy sleep<br>- sleeping problems<br>- relaxation exercises            | - support with sleep problems                                                                       |
| Closeness and sexuality             | - open communication about sexuality<br>- relaxation/massage exercises                | - removal of taboos regarding communication about sexuality<br>- encouragement to try something new |
| Existential burdens                 | - thinking about end of life<br>- hope, farewell, grief                               | - removal of taboos regarding thinking and talking about death                                      |

Table 3 Overview of the assessments

| Instruments                          | Aim                                                               | Time of measurement |    |    |
|--------------------------------------|-------------------------------------------------------------------|---------------------|----|----|
|                                      |                                                                   | T0                  | T1 | T2 |
| <b>Primary Outcome - feasibility</b> |                                                                   |                     |    |    |
| CSQ-I <sup>a</sup>                   | Participant satisfaction                                          |                     | ✓  | ✓  |
| INEP-On/INEP-CG                      | Negative effects online interventions/participation in study (CG) |                     | ✓  | ✓  |
| APOI                                 | Attitudes psychological interventions                             | ✓                   | ✓  | ✓  |
| Dropout rate                         | Participant adherence                                             |                     | ✓  | ✓  |
| <b>Secondary Outcome</b>             |                                                                   |                     |    |    |
| DT                                   | Distress                                                          | ✓                   | ✓  | ✓  |
| PHQ-8                                | Depression                                                        | ✓                   | ✓  | ✓  |
| GAD-7                                | Anxiety                                                           | ✓                   | ✓  | ✓  |
| VR-12                                | Quality of life                                                   | ✓                   | ✓  | ✓  |
| BSFC-s                               | Caregiver burden                                                  | ✓                   | ✓  | ✓  |

|            |                                       |   |   |   |
|------------|---------------------------------------|---|---|---|
| PA-F-P-KF  | Fear of progression                   | ✓ | ✓ | ✓ |
| ESSI       | Perceived emotional<br>social support | ✓ | ✓ | ✓ |
| OSS-3      | Received social support               | ✓ | ✓ | ✓ |
| SWE        | General self-efficacy<br>expectation  | ✓ | ✓ | ✓ |
| Brief COPE | Coping                                | ✓ | ✓ | ✓ |
| Loneliness | Feeling lonely                        | ✓ | ✓ | ✓ |

---

### Other assessments

---

Socio-demographics Age, sex, occupation, ✓  
children

Clinical characteristics Diagnosis, onset, disease ✓  
partner phase, current treatment

Psychotherapy ✓ ✓ ✓  
(yes/no, how long)

---

T0: Baseline, T1: 2 months, T2: 4 months; <sup>a</sup> Recorded in intervention group only

CSQ-I: Client Satisfaction Questionnaire adapted to internet-based interventions, INEP-On/INEP-CG: Inventory of negative effects in psychotherapy – online/-control group, APOI: Attitudes towards Psychological Online Interventions Questionnaire, DT: Distress Thermometer, PHQ-8: Patient Health Questionnaire, GAD-7: Generalized Anxiety Disorder, VR-12: Veterans RAND 12-item Health Survey, BSFC-s: Short version of the Burden Scale for family caregivers, PA-F-P-KF: Fear of progression questionnaire for partners, ESSI: ENRICH-D-Social-Support-Instrument, OSS-3: Oslo social support scale, SWE: general self-efficacy expectation scale, Brief COPE: abbreviated version of the COPE (Coping Orientation to Problems Experienced) Inventory

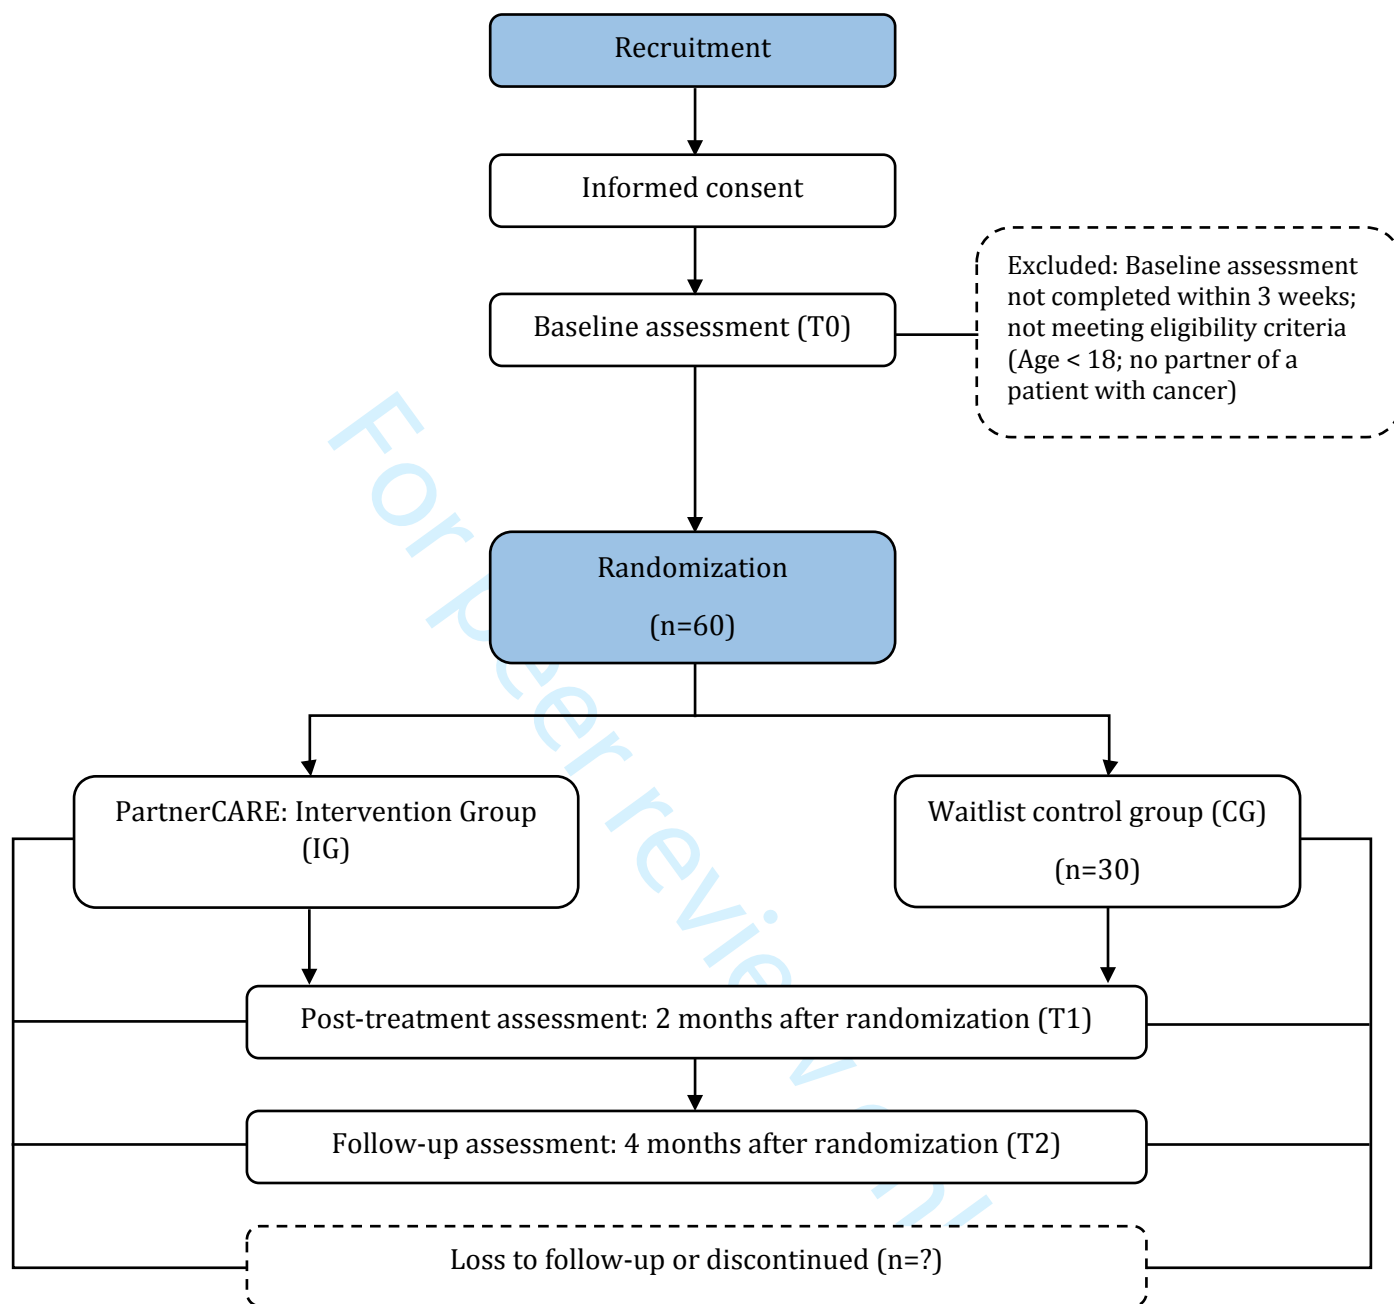

Figure 1 Flow diagram of the study procedure

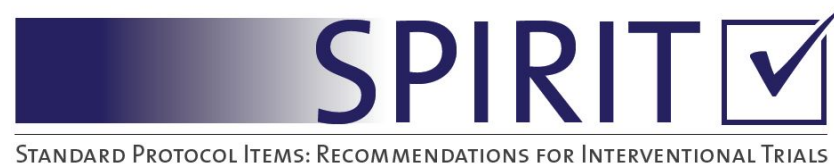

SPIRIT 2013 Checklist: Recommended items to address in a clinical trial protocol and related documents\*

| Section/item                      | Item No | Description                                                                                                                                                                                                                                                                              | Addressed on page number |
|-----------------------------------|---------|------------------------------------------------------------------------------------------------------------------------------------------------------------------------------------------------------------------------------------------------------------------------------------------|--------------------------|
| <b>Administrative information</b> |         |                                                                                                                                                                                                                                                                                          |                          |
| Title                             | 1       | Descriptive title identifying the study design, population, interventions, and, if applicable, trial acronym                                                                                                                                                                             | 1                        |
| Trial registration                | 2a      | Trial identifier and registry name. If not yet registered, name of intended registry                                                                                                                                                                                                     | 2, 17                    |
|                                   | 2b      | All items from the World Health Organization Trial Registration Data Set                                                                                                                                                                                                                 | 2                        |
| Protocol version                  | 3       | Date and version identifier                                                                                                                                                                                                                                                              | 1                        |
| Funding                           | 4       | Sources and types of financial, material, and other support                                                                                                                                                                                                                              | 18                       |
| Roles and responsibilities        | 5a      | Names, affiliations, and roles of protocol contributors                                                                                                                                                                                                                                  | 1                        |
|                                   | 5b      | Name and contact information for the trial sponsor                                                                                                                                                                                                                                       | -                        |
|                                   | 5c      | Role of study sponsor and funders, if any, in study design; collection, management, analysis, and interpretation of data; writing of the report; and the decision to submit the report for publication, including whether they will have ultimate authority over any of these activities | 17-18                    |
|                                   | 5d      | Composition, roles, and responsibilities of the coordinating centre, steering committee, endpoint adjudication committee, data management team, and other individuals or groups overseeing the trial, if applicable (see Item 21a for data monitoring committee)                         | -                        |



|    |                                                           |     |                                                                                                               |             |
|----|-----------------------------------------------------------|-----|---------------------------------------------------------------------------------------------------------------|-------------|
| 1  | <b>Introduction</b>                                       |     |                                                                                                               |             |
| 2  |                                                           |     |                                                                                                               |             |
| 3  | Background and                                            | 6a  | Description of research question and justification for undertaking the trial, including summary of relevant   | 4-5         |
| 4  | rationale                                                 |     | studies (published and unpublished) examining benefits and harms for each intervention                        |             |
| 5  |                                                           |     |                                                                                                               |             |
| 6  |                                                           | 6b  | Explanation for choice of comparators                                                                         | 9           |
| 7  |                                                           |     |                                                                                                               |             |
| 8  | Objectives                                                | 7   | Specific objectives or hypotheses                                                                             | 5           |
| 9  |                                                           |     |                                                                                                               |             |
| 10 | Trial design                                              | 8   | Description of trial design including type of trial (eg, parallel group, crossover, factorial, single group), |             |
| 11 |                                                           |     | allocation ratio, and framework (eg, superiority, equivalence, noninferiority, exploratory)                   | 5-6         |
| 12 |                                                           |     |                                                                                                               |             |
| 13 |                                                           |     |                                                                                                               |             |
| 14 | <b>Methods: Participants, interventions, and outcomes</b> |     |                                                                                                               |             |
| 15 |                                                           |     |                                                                                                               |             |
| 16 | Study setting                                             | 9   | Description of study settings (eg, community clinic, academic hospital) and list of countries where data will | 6           |
| 17 |                                                           |     | be collected. Reference to where list of study sites can be obtained                                          |             |
| 18 |                                                           |     |                                                                                                               |             |
| 19 | Eligibility criteria                                      | 10  | Inclusion and exclusion criteria for participants. If applicable, eligibility criteria for study centres and  | 6           |
| 20 |                                                           |     | individuals who will perform the interventions (eg, surgeons, psychotherapists)                               |             |
| 21 |                                                           |     |                                                                                                               |             |
| 22 | Interventions                                             | 11a | Interventions for each group with sufficient detail to allow replication, including how and when they will be | 7-9         |
| 23 |                                                           |     | administered                                                                                                  |             |
| 24 |                                                           |     |                                                                                                               |             |
| 25 |                                                           | 11b | Criteria for discontinuing or modifying allocated interventions for a given trial participant (eg, drug dose  | -           |
| 26 |                                                           |     | change in response to harms, participant request, or improving/worsening disease)                             |             |
| 27 |                                                           |     |                                                                                                               |             |
| 28 |                                                           | 11c | Strategies to improve adherence to intervention protocols, and any procedures for monitoring adherence        | 7,9         |
| 29 |                                                           |     | (eg, drug tablet return, laboratory tests)                                                                    |             |
| 30 |                                                           |     |                                                                                                               |             |
| 31 |                                                           | 11d | Relevant concomitant care and interventions that are permitted or prohibited during the trial                 | -           |
| 32 |                                                           |     |                                                                                                               |             |
| 33 | Outcomes                                                  | 12  | Primary, secondary, and other outcomes, including the specific measurement variable (eg, systolic blood       | 10-13       |
| 34 |                                                           |     | pressure), analysis metric (eg, change from baseline, final value, time to event), method of aggregation      |             |
| 35 |                                                           |     | (eg, median, proportion), and time point for each outcome. Explanation of the clinical relevance of chosen    |             |
| 36 |                                                           |     | efficacy and harm outcomes is strongly recommended                                                            |             |
| 37 |                                                           |     |                                                                                                               |             |
| 38 | Participant timeline                                      | 13  | Time schedule of enrolment, interventions (including any run-ins and washouts), assessments, and visits       | 6, Fig. 1   |
| 39 |                                                           |     | for participants. A schematic diagram is highly recommended (see Figure)                                      | (Flowchart) |
| 40 |                                                           |     |                                                                                                               |             |
| 41 |                                                           |     |                                                                                                               |             |
| 42 |                                                           |     |                                                                                                               |             |
| 43 |                                                           |     |                                                                                                               |             |
| 44 |                                                           |     |                                                                                                               |             |
| 45 |                                                           |     |                                                                                                               |             |
| 46 |                                                           |     |                                                                                                               |             |

|   |             |    |                                                                                                                                                                                       |    |
|---|-------------|----|---------------------------------------------------------------------------------------------------------------------------------------------------------------------------------------|----|
| 1 | Sample size | 14 | Estimated number of participants needed to achieve study objectives and how it was determined, including clinical and statistical assumptions supporting any sample size calculations | 10 |
| 2 |             |    |                                                                                                                                                                                       |    |
| 3 |             |    |                                                                                                                                                                                       |    |
| 4 | Recruitment | 15 | Strategies for achieving adequate participant enrolment to reach target sample size                                                                                                   | 6  |
| 5 |             |    |                                                                                                                                                                                       |    |

### 6 **Methods: Assignment of interventions (for controlled trials)**

#### 7 Allocation:

|    |                    |     |                                                                                                                                                                                                                                                                                                                                                          |     |
|----|--------------------|-----|----------------------------------------------------------------------------------------------------------------------------------------------------------------------------------------------------------------------------------------------------------------------------------------------------------------------------------------------------------|-----|
| 8  |                    |     |                                                                                                                                                                                                                                                                                                                                                          |     |
| 9  |                    |     |                                                                                                                                                                                                                                                                                                                                                          |     |
| 10 | Sequence           | 16a | Method of generating the allocation sequence (eg, computer-generated random numbers), and list of any factors for stratification. To reduce predictability of a random sequence, details of any planned restriction (eg, blocking) should be provided in a separate document that is unavailable to those who enrol participants or assign interventions | 7   |
| 11 | generation         |     |                                                                                                                                                                                                                                                                                                                                                          |     |
| 12 |                    |     |                                                                                                                                                                                                                                                                                                                                                          |     |
| 13 |                    |     |                                                                                                                                                                                                                                                                                                                                                          |     |
| 14 |                    |     |                                                                                                                                                                                                                                                                                                                                                          |     |
| 15 |                    |     |                                                                                                                                                                                                                                                                                                                                                          |     |
| 16 | Allocation         | 16b | Mechanism of implementing the allocation sequence (eg, central telephone; sequentially numbered, opaque, sealed envelopes), describing any steps to conceal the sequence until interventions are assigned                                                                                                                                                | 6-7 |
| 17 | concealment        |     |                                                                                                                                                                                                                                                                                                                                                          |     |
| 18 | mechanism          |     |                                                                                                                                                                                                                                                                                                                                                          |     |
| 19 |                    |     |                                                                                                                                                                                                                                                                                                                                                          |     |
| 20 | Implementation     | 16c | Who will generate the allocation sequence, who will enrol participants, and who will assign participants to interventions                                                                                                                                                                                                                                | 7   |
| 21 |                    |     |                                                                                                                                                                                                                                                                                                                                                          |     |
| 22 |                    |     |                                                                                                                                                                                                                                                                                                                                                          |     |
| 23 |                    |     |                                                                                                                                                                                                                                                                                                                                                          |     |
| 24 | Blinding (masking) | 17a | Who will be blinded after assignment to interventions (eg, trial participants, care providers, outcome assessors, data analysts), and how                                                                                                                                                                                                                | -   |
| 25 |                    |     |                                                                                                                                                                                                                                                                                                                                                          |     |
| 26 |                    |     |                                                                                                                                                                                                                                                                                                                                                          |     |
| 27 |                    | 17b | If blinded, circumstances under which unblinding is permissible, and procedure for revealing a participant's allocated intervention during the trial                                                                                                                                                                                                     | -   |
| 28 |                    |     |                                                                                                                                                                                                                                                                                                                                                          |     |
| 29 |                    |     |                                                                                                                                                                                                                                                                                                                                                          |     |
| 30 |                    |     |                                                                                                                                                                                                                                                                                                                                                          |     |

### 31 **Methods: Data collection, management, and analysis**

|    |                 |     |                                                                                                                                                                                                                                                                                                                                                                                                              |        |
|----|-----------------|-----|--------------------------------------------------------------------------------------------------------------------------------------------------------------------------------------------------------------------------------------------------------------------------------------------------------------------------------------------------------------------------------------------------------------|--------|
| 32 |                 |     |                                                                                                                                                                                                                                                                                                                                                                                                              |        |
| 33 | Data collection | 18a | Plans for assessment and collection of outcome, baseline, and other trial data, including any related processes to promote data quality (eg, duplicate measurements, training of assessors) and a description of study instruments (eg, questionnaires, laboratory tests) along with their reliability and validity, if known. Reference to where data collection forms can be found, if not in the protocol | 10-13  |
| 34 | methods         |     |                                                                                                                                                                                                                                                                                                                                                                                                              |        |
| 35 |                 |     |                                                                                                                                                                                                                                                                                                                                                                                                              |        |
| 36 |                 |     |                                                                                                                                                                                                                                                                                                                                                                                                              |        |
| 37 |                 |     |                                                                                                                                                                                                                                                                                                                                                                                                              |        |
| 38 |                 | 18b | Plans to promote participant retention and complete follow-up, including list of any outcome data to be collected for participants who discontinue or deviate from intervention protocols                                                                                                                                                                                                                    | 10, 13 |
| 39 |                 |     |                                                                                                                                                                                                                                                                                                                                                                                                              |        |
| 40 |                 |     |                                                                                                                                                                                                                                                                                                                                                                                                              |        |
| 41 |                 |     |                                                                                                                                                                                                                                                                                                                                                                                                              |        |
| 42 |                 |     |                                                                                                                                                                                                                                                                                                                                                                                                              |        |

|    |                                 |     |                                                                                                                                                                                                                                                                                                                                       |           |
|----|---------------------------------|-----|---------------------------------------------------------------------------------------------------------------------------------------------------------------------------------------------------------------------------------------------------------------------------------------------------------------------------------------|-----------|
| 1  | Data management                 | 19  | Plans for data entry, coding, security, and storage, including any related processes to promote data quality (eg, double data entry; range checks for data values). Reference to where details of data management procedures can be found, if not in the protocol                                                                     | 6, 10, 18 |
| 2  |                                 |     |                                                                                                                                                                                                                                                                                                                                       |           |
| 3  |                                 |     |                                                                                                                                                                                                                                                                                                                                       |           |
| 4  |                                 |     |                                                                                                                                                                                                                                                                                                                                       |           |
| 5  | Statistical methods             | 20a | Statistical methods for analysing primary and secondary outcomes. Reference to where other details of the statistical analysis plan can be found, if not in the protocol                                                                                                                                                              | 14        |
| 6  |                                 |     |                                                                                                                                                                                                                                                                                                                                       |           |
| 7  |                                 |     |                                                                                                                                                                                                                                                                                                                                       |           |
| 8  |                                 | 20b | Methods for any additional analyses (eg, subgroup and adjusted analyses)                                                                                                                                                                                                                                                              | -         |
| 9  |                                 |     |                                                                                                                                                                                                                                                                                                                                       |           |
| 10 |                                 | 20c | Definition of analysis population relating to protocol non-adherence (eg, as randomised analysis), and any statistical methods to handle missing data (eg, multiple imputation)                                                                                                                                                       | 14        |
| 11 |                                 |     |                                                                                                                                                                                                                                                                                                                                       |           |
| 12 |                                 |     |                                                                                                                                                                                                                                                                                                                                       |           |
| 13 |                                 |     |                                                                                                                                                                                                                                                                                                                                       |           |
| 14 | <b>Methods: Monitoring</b>      |     |                                                                                                                                                                                                                                                                                                                                       |           |
| 15 |                                 |     |                                                                                                                                                                                                                                                                                                                                       |           |
| 16 | Data monitoring                 | 21a | Composition of data monitoring committee (DMC); summary of its role and reporting structure; statement of whether it is independent from the sponsor and competing interests; and reference to where further details about its charter can be found, if not in the protocol. Alternatively, an explanation of why a DMC is not needed | -         |
| 17 |                                 |     |                                                                                                                                                                                                                                                                                                                                       |           |
| 18 |                                 |     |                                                                                                                                                                                                                                                                                                                                       |           |
| 19 |                                 |     |                                                                                                                                                                                                                                                                                                                                       |           |
| 20 |                                 |     |                                                                                                                                                                                                                                                                                                                                       |           |
| 21 |                                 |     |                                                                                                                                                                                                                                                                                                                                       |           |
| 22 |                                 | 21b | Description of any interim analyses and stopping guidelines, including who will have access to these interim results and make the final decision to terminate the trial                                                                                                                                                               | -         |
| 23 |                                 |     |                                                                                                                                                                                                                                                                                                                                       |           |
| 24 |                                 |     |                                                                                                                                                                                                                                                                                                                                       |           |
| 25 | Harms                           | 22  | Plans for collecting, assessing, reporting, and managing solicited and spontaneously reported adverse events and other unintended effects of trial interventions or trial conduct                                                                                                                                                     | 10-11     |
| 26 |                                 |     |                                                                                                                                                                                                                                                                                                                                       |           |
| 27 |                                 |     |                                                                                                                                                                                                                                                                                                                                       |           |
| 28 | Auditing                        | 23  | Frequency and procedures for auditing trial conduct, if any, and whether the process will be independent from investigators and the sponsor                                                                                                                                                                                           | -         |
| 29 |                                 |     |                                                                                                                                                                                                                                                                                                                                       |           |
| 30 |                                 |     |                                                                                                                                                                                                                                                                                                                                       |           |
| 31 |                                 |     |                                                                                                                                                                                                                                                                                                                                       |           |
| 32 | <b>Ethics and dissemination</b> |     |                                                                                                                                                                                                                                                                                                                                       |           |
| 33 |                                 |     |                                                                                                                                                                                                                                                                                                                                       |           |
| 34 | Research ethics approval        | 24  | Plans for seeking research ethics committee/institutional review board (REC/IRB) approval                                                                                                                                                                                                                                             | 17        |
| 35 |                                 |     |                                                                                                                                                                                                                                                                                                                                       |           |
| 36 |                                 |     |                                                                                                                                                                                                                                                                                                                                       |           |
| 37 | Protocol amendments             | 25  | Plans for communicating important protocol modifications (eg, changes to eligibility criteria, outcomes, analyses) to relevant parties (eg, investigators, REC/IRBs, trial participants, trial registries, journals, regulators)                                                                                                      | 17        |
| 38 |                                 |     |                                                                                                                                                                                                                                                                                                                                       |           |
| 39 |                                 |     |                                                                                                                                                                                                                                                                                                                                       |           |
| 40 |                                 |     |                                                                                                                                                                                                                                                                                                                                       |           |
| 41 |                                 |     |                                                                                                                                                                                                                                                                                                                                       |           |
| 42 |                                 |     |                                                                                                                                                                                                                                                                                                                                       |           |

|    |                               |     |                                                                                                                                                                                                                                                                                     |          |
|----|-------------------------------|-----|-------------------------------------------------------------------------------------------------------------------------------------------------------------------------------------------------------------------------------------------------------------------------------------|----------|
| 1  | Consent or assent             | 26a | Who will obtain informed consent or assent from potential trial participants or authorised surrogates, and how (see Item 32)                                                                                                                                                        | 6, 18    |
| 2  |                               |     |                                                                                                                                                                                                                                                                                     |          |
| 3  |                               |     |                                                                                                                                                                                                                                                                                     |          |
| 4  |                               | 26b | Additional consent provisions for collection and use of participant data and biological specimens in ancillary studies, if applicable                                                                                                                                               | -        |
| 5  |                               |     |                                                                                                                                                                                                                                                                                     |          |
| 6  |                               |     |                                                                                                                                                                                                                                                                                     |          |
| 7  | Confidentiality               | 27  | How personal information about potential and enrolled participants will be collected, shared, and maintained in order to protect confidentiality before, during, and after the trial                                                                                                | 6, 10,18 |
| 8  |                               |     |                                                                                                                                                                                                                                                                                     |          |
| 9  |                               |     |                                                                                                                                                                                                                                                                                     |          |
| 10 | Declaration of interests      | 28  | Financial and other competing interests for principal investigators for the overall trial and each study site                                                                                                                                                                       | 18       |
| 11 |                               |     |                                                                                                                                                                                                                                                                                     |          |
| 12 |                               |     |                                                                                                                                                                                                                                                                                     |          |
| 13 | Access to data                | 29  | Statement of who will have access to the final trial dataset, and disclosure of contractual agreements that limit such access for investigators                                                                                                                                     | 18       |
| 14 |                               |     |                                                                                                                                                                                                                                                                                     |          |
| 15 |                               |     |                                                                                                                                                                                                                                                                                     |          |
| 16 | Ancillary and post-trial care | 30  | Provisions, if any, for ancillary and post-trial care, and for compensation to those who suffer harm from trial participation                                                                                                                                                       | -        |
| 17 |                               |     |                                                                                                                                                                                                                                                                                     |          |
| 18 |                               |     |                                                                                                                                                                                                                                                                                     |          |
| 19 |                               |     |                                                                                                                                                                                                                                                                                     |          |
| 20 | Dissemination policy          | 31a | Plans for investigators and sponsor to communicate trial results to participants, healthcare professionals, the public, and other relevant groups (eg, via publication, reporting in results databases, or other data sharing arrangements), including any publication restrictions | 2        |
| 21 |                               |     |                                                                                                                                                                                                                                                                                     |          |
| 22 |                               |     |                                                                                                                                                                                                                                                                                     |          |
| 23 |                               |     |                                                                                                                                                                                                                                                                                     |          |
| 24 |                               | 31b | Authorship eligibility guidelines and any intended use of professional writers                                                                                                                                                                                                      | -        |
| 25 |                               |     |                                                                                                                                                                                                                                                                                     |          |
| 26 |                               | 31c | Plans, if any, for granting public access to the full protocol, participant-level dataset, and statistical code                                                                                                                                                                     | -        |
| 27 |                               |     |                                                                                                                                                                                                                                                                                     |          |
| 28 |                               |     |                                                                                                                                                                                                                                                                                     |          |
| 29 | <b>Appendices</b>             |     |                                                                                                                                                                                                                                                                                     |          |
| 30 |                               |     |                                                                                                                                                                                                                                                                                     |          |
| 31 | Informed consent materials    | 32  | Model consent form and other related documentation given to participants and authorised surrogates                                                                                                                                                                                  | -        |
| 32 |                               |     |                                                                                                                                                                                                                                                                                     |          |
| 33 |                               |     |                                                                                                                                                                                                                                                                                     |          |
| 34 | Biological specimens          | 33  | Plans for collection, laboratory evaluation, and storage of biological specimens for genetic or molecular analysis in the current trial and for future use in ancillary studies, if applicable                                                                                      | -        |
| 35 |                               |     |                                                                                                                                                                                                                                                                                     |          |
| 36 |                               |     |                                                                                                                                                                                                                                                                                     |          |

\*It is strongly recommended that this checklist be read in conjunction with the SPIRIT 2013 Explanation & Elaboration for important clarification on the items. Amendments to the protocol should be tracked and dated. The SPIRIT checklist is copyrighted by the SPIRIT Group under the Creative Commons [“Attribution-NonCommercial-NoDerivs 3.0 Unported”](https://creativecommons.org/licenses/by-nc-nd/3.0/) license.

# BMJ Open

## PartnerCARE – a psycho-oncological online intervention for partners of patients with cancer: Study protocol for a randomized controlled feasibility trial

|                                 |                                                                                                                                                                                                                                                                                                                                                                                                                                                                                                                                                                                                                                                                                                                                                                                       |
|---------------------------------|---------------------------------------------------------------------------------------------------------------------------------------------------------------------------------------------------------------------------------------------------------------------------------------------------------------------------------------------------------------------------------------------------------------------------------------------------------------------------------------------------------------------------------------------------------------------------------------------------------------------------------------------------------------------------------------------------------------------------------------------------------------------------------------|
| Journal:                        | <i>BMJ Open</i>                                                                                                                                                                                                                                                                                                                                                                                                                                                                                                                                                                                                                                                                                                                                                                       |
| Manuscript ID                   | bmjopen-2019-035599.R1                                                                                                                                                                                                                                                                                                                                                                                                                                                                                                                                                                                                                                                                                                                                                                |
| Article Type:                   | Protocol                                                                                                                                                                                                                                                                                                                                                                                                                                                                                                                                                                                                                                                                                                                                                                              |
| Date Submitted by the Author:   | 03-May-2020                                                                                                                                                                                                                                                                                                                                                                                                                                                                                                                                                                                                                                                                                                                                                                           |
| Complete List of Authors:       | Bodschwinna, Daniela; University Ulm Medical Centre, Department of Psychosomatic Medicine and Psychotherapy; Comprehensive Cancer Center Ulm (CCCU)<br>Lorenz, Inga; University Ulm Medical Centre, Department of Psychosomatic Medicine and Psychotherapy<br>Bauereiss, Natalie; Ulm University, Institut of Psychology and Education, Department of Clinical Psychology and Psychotherapy<br>Gündel, Harald; University Ulm Medical Centre, Department of Psychosomatic Medicine and Psychotherapy<br>Baumeister, Harald; Ulm University, Institut of Psychology and Education, Department of Clinical Psychology and Psychotherapy<br>Hoenig, Klaus; University Ulm Medical Centre, Department of Psychosomatic Medicine and Psychotherapy; Comprehensive Cancer Center Ulm (CCCU) |
| <b>Primary Subject Heading</b>: | Mental health                                                                                                                                                                                                                                                                                                                                                                                                                                                                                                                                                                                                                                                                                                                                                                         |
| Secondary Subject Heading:      | Oncology                                                                                                                                                                                                                                                                                                                                                                                                                                                                                                                                                                                                                                                                                                                                                                              |
| Keywords:                       | MENTAL HEALTH, ONCOLOGY, Adult oncology < ONCOLOGY                                                                                                                                                                                                                                                                                                                                                                                                                                                                                                                                                                                                                                                                                                                                    |
|                                 |                                                                                                                                                                                                                                                                                                                                                                                                                                                                                                                                                                                                                                                                                                                                                                                       |

SCHOLARONE™  
Manuscripts

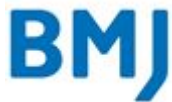

I, the Submitting Author has the right to grant and does grant on behalf of all authors of the Work (as defined in the below author licence), an exclusive licence and/or a non-exclusive licence for contributions from authors who are: i) UK Crown employees; ii) where BMJ has agreed a CC-BY licence shall apply, and/or iii) in accordance with the terms applicable for US Federal Government officers or employees acting as part of their official duties; on a worldwide, perpetual, irrevocable, royalty-free basis to BMJ Publishing Group Ltd ("BMJ") its licensees and where the relevant Journal is co-owned by BMJ to the co-owners of the Journal, to publish the Work in this journal and any other BMJ products and to exploit all rights, as set out in our [licence](#).

The Submitting Author accepts and understands that any supply made under these terms is made by BMJ to the Submitting Author unless you are acting as an employee on behalf of your employer or a postgraduate student of an affiliated institution which is paying any applicable article publishing charge ("APC") for Open Access articles. Where the Submitting Author wishes to make the Work available on an Open Access basis (and intends to pay the relevant APC), the terms of reuse of such Open Access shall be governed by a Creative Commons licence – details of these licences and which [Creative Commons](#) licence will apply to this Work are set out in our licence referred to above.

Other than as permitted in any relevant BMJ Author's Self Archiving Policies, I confirm this Work has not been accepted for publication elsewhere, is not being considered for publication elsewhere and does not duplicate material already published. I confirm all authors consent to publication of this Work and authorise the granting of this licence.

# PartnerCARE – a psycho-oncological online intervention for partners of patients with cancer: Study protocol for a randomized controlled feasibility trial

Daniela Bodschwinna<sup>1,2\*</sup>, Inga Lorenz<sup>1</sup>, Natalie Bauereiss<sup>3</sup>, Harald Gündel<sup>1</sup>, Harald Baumeister<sup>3</sup>, Klaus Hoenig<sup>1,2</sup>

<sup>1</sup> Department of Psychosomatic Medicine and Psychotherapy, University Medical Center Ulm, Germany

<sup>2</sup> Comprehensive Cancer Center Ulm (CCCU), Germany

<sup>3</sup> Department of Clinical Psychology and Psychotherapy, Institute of Psychology and Education, University of Ulm, Germany

\*Corresponding author

## Address for Correspondence:

Daniela Bodschwinna

Department of Psychosomatic Medicine and Psychotherapy, University Medical Center Ulm

Albert-Einstein-Allee 23

89081 Ulm, Germany

Phone: +49 731/5032815, e-mail: [daniela.bodschwinna@uni-ulm.de](mailto:daniela.bodschwinna@uni-ulm.de)

Protocol version 2 – 30/04/2020

Word count: 6129

## Abstract

**Introduction:** Cancer burdens not only the patient, but also the partner to a comparable extent. Partners of patients with cancer are highly involved in the caring process and therefore often experience distress and report a low quality of life. Interventions for supporting partners are scarce. Existing ones are rarely used by partners because they are often time consuming *per se* and offer only limited flexibility with regard to schedule and location. The online intervention PartnerCARE has been developed on basis of caregiver needs and consists of six consecutive sessions and four optional sessions, which are all guided by an e-coach. The study aims to evaluate feasibility and acceptance of the online intervention PartnerCARE and the related trial process. In addition, first insights of the putative efficacy of PartnerCARE should be gained.

**Methods and analysis:** A two arm parallel group randomized controlled trial (RCT) will be conducted to compare the PartnerCARE online intervention with a waitlist control group. The study aims to recruit in total n=60 partners of patients with any type of cancer across different access paths (e.g. university medical centres, support groups, social media). Congruent with feasibility study objectives, the primary outcome comprises recruitment process, study procedure, acceptance and satisfaction with the intervention (CSQ-I), possible negative effects (INEP) and drop-out rates. Secondary outcomes include quality of life, distress, depression, anxiety, caregiver burden, fear of progression, social support, self-efficacy, coping and loneliness. Online measurements will be performed by self-assessment at three time points (baseline/pre-randomization, 2 months and 4 months after randomization). Data analyses will be based on intention-to-treat principle.

**Ethics and dissemination:** Ethics approval has been granted by the Ethics Committee of the University of Ulm (No. 390/18). Results from this study will be disseminated to relevant healthcare communities, in peer-reviewed journals and at scientific and clinical conferences.

**Keywords:** cancer, caregiver, partner, spouse, distress, quality of life, caregiver burden, e-health

**Trial Registration number:** DRKS00017019. Registered on 08 April 2019.



### Strengths and limitations of this study

- Randomized controlled feasibility trial of a novel online intervention specifically tailored to the care needs of partners of patients with cancer
- The PartnerCARE online intervention integrates evidence-based psychological support including psycho-educational, cognitive-behavioural and guided imagery components
- Low-threshold intervention for partners with low utilization of psychosocial services due to time and logistic limitations, low self-awareness of own care needs as well as gender-related concerns (e.g. male partners)
- Possible adverse effects of the intervention will be monitored
- Challenges of the trial comprise the diverse target group (regarding e.g. age, diagnosis of the patient, progress of the disease) and technical comprehension of the participants

## Introduction

Family members, particularly the partners, are increasingly involved in care of individuals with cancer [1]. They support the patient in daily life (e.g. manage treatment appointments, additional tasks in the household, manage medication, provide emotional support) and are often not aware of their own needs [2,3]. The disease and the corresponding challenging situation can lead to a great impact on the partner's wellbeing and health. Partners are at high risk to suffer from various types of problems including social and emotional problems [4]. Hence caregivers of cancer patients reported significant more impairments than non-caregivers regarding work productivity, activity and quality of life [5]. Whereas the physical quality of life of partners is similar to a norm population, their reported mental quality of life is significantly lower [6]. Caregivers have also a significant higher occurrence of stress-related comorbidities like depression (OR=1.50), anxiety (OR=1.97) or insomnia (OR=2.01) compared to non-caregivers [5] and similar prevalence of depression (RR=1.01) and anxiety (RR=.71) compared to the patients [7,8]. Concurrently specific burden of caregivers often stays invisible, due to the fact that the health care system focus on the patient and partner's supportive care needs are often neglected or not reported proactive from partners [9]. Male partners as caregivers are a particularly under-recognized and under-supported group [10].

Several psychosocial interventions have been designed to address the needs of cancer caregiver. The interventions differ regarding their aim (e.g. reduce caregiver burden, improve quality of life), the underlying approaches (e.g. psychoeducation, cognitive-behavioural therapy, existential therapy), delivering format (e.g. face-to-face, online, telephone and group therapy, dyadic, individual) and addressed participants (e.g. couple, caregiver alone). Systematic reviews have shown that these interventions have small to medium positive effects on multiple outcomes for caregivers [11–13], but interventions relying solely on cognitive behavioural therapy have only negligible effects on caregivers [14]. Especially in couple interventions the effects for caregivers have to be considered critically, because numerous interventions focus on patient care and caregivers are only involved as support resource [11]. In general intervention studies often lack of reporting how to implement the interventions into practice [15]. There are two main challenges about interventions for caregivers: First, the target group is difficult to reach, which is evident from low recruitment rates [12,16]. Second, the existing face-to-face interventions are rarely used by caregivers (e.g. too time-consuming, caregivers are unaware of own needs) [17,18]. Therefore, online interventions move into focus since the last decade and they are broadly perceived as suitable, acceptable and helpful for cancer caregivers [16,17,19]. Online interventions have several advantages over other treatment delivering formats: online interventions are easy and quick accessible, flexible regarding time and location independency and allow caregivers privacy

1  
2  
3 while seeking for information and support [20,21]. Furthermore nearly a half of the caring  
4 partners are interested in using online interventions and would prefer an intervention that takes  
5 less than 1 hour per week, lasts minimum five weeks, is addressed to the partner only and contains  
6 information and peer support [22,23].  
7  
8  
9

10 In the context of the German National Cancer Plan the Federal Ministry of Health requests  
11 appropriate psycho-oncological care for all patients and caregivers in need [24,25] irrespective of  
12 inpatient or outpatient treatment. A recent report on the psycho-oncological care in Germany  
13 recommends to develop and promote innovative offers like e-health programs [26]. Despite the  
14 structures and recommendations a lot of patients and caregivers receive no or no promptly and  
15 no low-threshold psycho-oncological care in Germany [27].  
16  
17  
18  
19

20 Already developed or planned online interventions for caregivers address couples [28,29],  
21 informal caregivers in general (including partners, children, parents) [30,31] or male caregivers  
22 and caregivers of patients with a specific type of cancer [32,33], while only one hitherto known  
23 intervention particularly addresses partners [34]. None of them is available in German. The  
24 results from online interventions for caregivers are rare, because to date most of them did only  
25 publish study protocols [33,34] or promising trend results from feasibility studies [28–32].  
26  
27  
28  
29

### 30 **Aim**

31  
32 The present study has two aims. First, we want to evaluate the feasibility of the online intervention  
33 PartnerCARE and the extent of participants' satisfaction with the intervention. Second, the  
34 potential efficacy of PartnerCARE on the partner's wellbeing will be investigated compared to the  
35 waitlist control group post treatment and over 4-month follow-up. The results of this feasibility  
36 study will be used to optimize PartnerCARE via participant feedback. Subsequently a  
37 comprehensive efficacy evaluation of the online intervention is planned.  
38  
39  
40  
41  
42  
43  
44  
45

## 46 **Methods**

### 47 **Study design**

48  
49 This is a two arm, parallel randomized controlled trial comparing the online intervention  
50 PartnerCARE (intervention group, IG) with a waitlist control group (CG). Participants of the  
51 intervention group will receive the guided version (with individual feedback from an e-coach) of  
52 PartnerCARE. The control group will receive no intervention during the study. After a waiting  
53 period of 4 months participants of the control group will get the opportunity to work on the  
54 unguided version (with automatic feedback) of PartnerCARE. Assessments of the primary and  
55  
56  
57  
58  
59  
60

1  
2  
3 secondary outcomes will take place at baseline (T0), 2 months after randomization (post-  
4 treatment, T1) and 4 months after randomization (follow-up, T2).  
5

6  
7 This clinical trial has been approved by the ethics committee of Ulm University (No. 390/18) and  
8 will be conducted and reported in accordance with the Consolidated Standards of Reporting Trials  
9 (CONSORT) Statement for pilot RCTs [35] as well as the guidelines for executing and reporting  
10 internet intervention research [36]. The study protocol is reported according to the SPIRIT  
11 (Standard Protocol Items: Recommendations for Interventional Trials) 2013 Statement [37]. This  
12 study is registered in the German clinical trial register under [DRKS00017019](https://www.drks.de/DRKS00017019).  
13  
14  
15

### 16 17 **Inclusion and exclusion criteria**

18  
19 The primary inclusion criterion for participation is to be in a relationship with a partner who is  
20 diagnosed with any type of cancer (initial diagnosis or relapse, regardless of the onset of the  
21 disease or stage of the patient's treatment). Participants are required (1) to be age 18 or above,  
22 (2) have an internet access and an appropriate device, (3) provide the study team an e-mail  
23 address for contact reasons and (4) sign an informed consent. Participants do not have to live with  
24 the patient, but participants will be excluded if the partner with cancer has died before the start  
25 of the study. Inclusion and exclusion criteria will be checked at the first online assessment (T0)  
26 via self-report.  
27  
28  
29  
30  
31

### 32 33 **Recruitment**

34  
35 To overcome the challenge of recruiting cancer caregivers, recruitment take place in a multiplicity  
36 of online and offline fields in the complete German-speaking area (includes Germany, Austria and  
37 Switzerland). Participants are recruited in relevant social media groups (e.g. groups for caregivers  
38 of patients with cancer), in online communities, via flyers and circular emails in university medical  
39 centres, links on clinic homepages, online and offline support groups, cancer counselling centres  
40 and comprehensive cancer centres (CCCs). All recruitment routes lead to the PartnerCARE study  
41 homepage ([www.esano.klips-ulm.de/de/trainings/krebserkrankung/partnercare/](http://www.esano.klips-ulm.de/de/trainings/krebserkrankung/partnercare/)), where  
42 potential participants get information and can register for the study via contact form or sending  
43 an e-mail to the study team. Recruitment started in April 2019 and is still ongoing until the target  
44 sample size will be reached. Due to further project plans and financial reasons recruitment will be  
45 closed after 18 months, even if the target sample size could not be reached.  
46  
47  
48  
49  
50  
51  
52

### 53 54 **Study Procedure**

55  
56 After initial contact via study homepage or e-mail interested partners will receive an e-mail from  
57 the study team including a PDF with detailed participation information and an informed consent  
58 form attached. After given informed consent (via e-mail, fax or mail), participants will get an  
59 invitation to the online baseline assessment (T0) and will be randomized afterwards either to the  
60

1  
2  
3 intervention group (immediately access to the guided version of PartnerCARE) or to the waitlist  
4 control group (access to the unguided version of PartnerCARE after about 4 months according to  
5 the follow-up assessment). Participants will be informed via e-mail about group affiliation. 2  
6 months and 4 months after randomization all participants will receive an invitation for post-  
7 treatment and follow-up assessment (Figure 1).  
8  
9

10  
11  
12 \*\*\* Please insert figure 1 about here\*\*\*  
13

## 14 **Randomization**

15  
16 Randomization and allocation of participants to two groups will be conducted by an independent  
17 researcher, who is not involved in other processes of the study, using an automated online  
18 randomization program ([www.sealedenvelope.com](http://www.sealedenvelope.com)). Permuted block randomization with  
19 randomly arranged block sizes (2 and 4) with an allocation ratio of 1:1 (allocation to intervention  
20 and waitlist control condition will be equally distributed in each block) will be performed. This  
21 results in a preferably balanced group distribution and that the data collector is not able to  
22 forecast the allocation of participant.  
23  
24  
25  
26  
27

## 28 **Intervention**

### 29 *Development of the intervention*

30  
31  
32 The development of PartnerCARE was inspired by a therapy manual for a structured group  
33 intervention about psychoeducation with cancer patients [38] and internet intervention  
34 standards established by the research group were used [e.g. 39]. Thus, the intervention is based  
35 on various concepts which are widely used in cancer context: psychoeducation, behavioural  
36 therapy, supportive therapy and guided imagery [12]. The group intervention was adapted to an  
37 individually online format and to the specific needs of caregivers. A literature search was  
38 conducted, focusing on current reviews, qualitative and quantitative research about needs of  
39 cancer caregivers. An overview of caregiver needs is listed in Table 1. The most relevant topics  
40 out of the caregiver needs are included into the PartnerCARE intervention and some topics that  
41 may only be relevant to some are provided as optional additional sessions (e.g. sexuality, death  
42 and dying). As PartnerCARE is an offer to partners of patients with any kind of cancer, we  
43 abstained from putting detailed information about specific cancer disease and treatment into the  
44 intervention to avoid an overload of the single sessions. Instead a list of relevant websites with  
45 further information and help services is provided in the 6<sup>th</sup> session.  
46  
47  
48  
49  
50  
51  
52  
53  
54

55  
56 In order to ensure participant motivation several persuasive elements were integrated in the  
57 design of PartnerCARE [40–42]. The reduction principle is used by providing a weekly activity  
58 plan where participants record small activities for each day to learn in small and simple steps to  
59 improve self-care. At the beginning of each session the experience with the activities are queried  
60

(rehearsal principle). The tunneling principle is implemented by guiding the participants through the intervention with feedback after each session from the e-coach. Reminders are sent if the weekly session is exceeded 2 days. Three exemplary partners are specifically developed regarding the similarity and social learning principle by telling their story, giving exemplary answers on exercises and accompany the participants through the sessions. These exemplary partners are introducing themselves in the first session via picture and written text. In all following sessions participants can click on the picture of the exemplary partners and read their exemplary answers to various exercises. The exemplary partners are provided to show participants that they are not alone with their burdens. The online intervention is offered through Minddistrict ([www.minddistrict.com](http://www.minddistrict.com)), an e-health platform where a secure access to the online intervention and a secure exchange between participant and e-coach is granted. The internet platform and the intervention are available 24 hours a day and 7 days a week.

The first version of PartnerCARE (main sessions) was evaluated by 4 independent psycho oncologists (three psychologists, one psychiatrist) who were not involved in the development process. Each psycho oncologist valued one session via the think aloud method [43]: while they were working on the session they were encouraged to vocalize what they are thinking at the moment. Participant comments were collected on a list and used to further develop PartnerCARE regarding user friendliness (e.g. insert of progress bars on each page), text formulations (e.g. incomprehensible and too psychological phrases verbalized more generally understandable) and content adjustments (e.g. connections to previous sessions). The overall development process lasted from January 2018 until February 2019.

Table 1 Overview of needs of cancer caregivers

| Needs of caregivers                 |                                                                                                     | Literature      |
|-------------------------------------|-----------------------------------------------------------------------------------------------------|-----------------|
| Information                         | about illness and treatment,<br>how to provide care                                                 | [8,23,44,45]    |
| Comprehensive cancer care           | contact with healthcare professionals,<br>knowledge of available services like e.g.<br>peer support | [8,21,23,44,45] |
| Emotional and psychological support | sleep disturbances, depression, anxiety,<br>fatigue, weight gain                                    | [8,23,44,46]    |
| Impact in daily life                | financial, uncertainty, looking after own<br>health, balance own needs with needs of<br>patient     | [8,21,23,44-46] |
| Relationship                        | communication, sexuality                                                                            | [8,23,44]       |
| Spirituality                        |                                                                                                     | [44,46]         |

### *Content of the intervention*

The content of the online intervention PartnerCARE (Table 2) is composed of different empirically evaluated and clinically established manuals [e.g 38,47]. In the intervention we combined content of different reliable approaches, which are shown to be effective for caregivers [e.g.12]: psycho-education, cognitive behavioural therapy, supportive therapy and guided imagery elements. Therefore, the intervention focuses on activating resources, positive activities, communication skills, improving self-care and self-help strategies to manage caregiver burdens. In addition to psycho-educative text the intervention contains visual and audio materials to enhance understanding and readability as well as to increase adherence and efficacy [48]. Practical exercises and the three exemplary partners make the intervention interactive. The guided imagery exercises facilitate awareness of inner-soul processes and they are used for relaxation. To create a transfer of the learned content and strategies into daily life, examples and exercises for home practice between the sessions are contained. PartnerCARE consists of one introduction session (overview of the intervention, introduction in technical handling of the intervention), six main consecutive sessions, four optional additional sessions with specific content and one booster session. The optional sessions are presented at the third main session and can be selected by the participant. Duration of each session varies from 30 to 60 minutes, but there is no time limit. Participants work on their own and can take breaks within a session whenever and how often they want. It is recommended to work on one session each week to have enough time between the sessions for practicing. Therefore, at the end of each session participants are asked to set an appointment for working on the next session.

To have a clear structure over the whole intervention, every session follows the same process:

1. Today's feeling: rating on a burden thermometer from 0 ("no burden") to 10 ("high burden") and describing the current feeling
2. Report of home practice from the last week
3. Basic information: psychoeducation about the topic of the session
4. Practical exercises: During the session or for practice between the sessions
5. Preview of the main topic from the next session
6. Guided imagery exercise: guided audio imagination of approximately 10 minutes with different topics



Table 2 Structure and content of the PartnerCARE sessions

| Sessions                      | Content                                                                                                                                                                                                                                       | Example exercise                                                                                                                                                                                                                |
|-------------------------------|-----------------------------------------------------------------------------------------------------------------------------------------------------------------------------------------------------------------------------------------------|---------------------------------------------------------------------------------------------------------------------------------------------------------------------------------------------------------------------------------|
| Introduction                  | <ul style="list-style-type: none"> <li>- technical issues and functions</li> <li>- overview of the training</li> </ul>                                                                                                                        | <i>Aim:</i> train the ability to use the online intervention                                                                                                                                                                    |
| <b>Main sessions</b>          |                                                                                                                                                                                                                                               |                                                                                                                                                                                                                                 |
| 1. Specific burdens           | <ul style="list-style-type: none"> <li>- specific burdens (e.g. from partners</li> <li>- identification of own resources (e.g.</li> <li>- plan for positive activities</li> </ul>                                                             | We ask the partner to write down their story and how they cope with it. <i>Aim:</i> awareness of burden and perception of how to deal with the burden using existing resources                                                  |
| 2. Inner drivers              | <ul style="list-style-type: none"> <li>- identification, interpretation and meaning of personal drivers (e.g. 'be perfect', 'please others') and their possible impact in caregiver context</li> <li>- giving yourself permissions</li> </ul> | Partners identify their inner drivers via questionnaire and are asked to phrase self-permissions. <i>Aim:</i> recognizing and down-scaling of excessive expectations on the own person to facilitate daily life                 |
| 3. Partnership communication  | <ul style="list-style-type: none"> <li>- basic rules of successful communication (non-verbal, gender differences)</li> <li>- communication in the context of disease</li> </ul>                                                               | Partners are asked to write down their communication problems. Afterwards they should plan a conversation with implementing the learned communication rules. <i>Aim:</i> improve open communication between partner and patient |
| 4. Handling negative feelings | <ul style="list-style-type: none"> <li>- focus on anxiety</li> <li>- mindfulness as strategy to deal with anxiety</li> </ul>                                                                                                                  | Partners are encouraged to try different mindfulness exercises. <i>Aim:</i> reduction of dysfunctional coping and regain of control                                                                                             |



|                                     |                                                                                                                                                                      |                                                                                                                                                                                                                                                   |
|-------------------------------------|----------------------------------------------------------------------------------------------------------------------------------------------------------------------|---------------------------------------------------------------------------------------------------------------------------------------------------------------------------------------------------------------------------------------------------|
| 5. Control and acceptance           | <ul style="list-style-type: none"> <li>- discrimination between things which are controllable or should be accepted</li> <li>- enjoyment in everyday life</li> </ul> | Partners are asked which actuality they want to accept because it's not controllable. Furthermore, they learn how to enjoy little things. <i>Aim:</i> awareness of dysfunctional control and awareness of little positive things in everyday life |
| 6. Paths and goals                  | <ul style="list-style-type: none"> <li>- further support offers</li> <li>- reflection of the training</li> <li>- outlook: next steps / goals</li> </ul>              | We ask the partner what was helpful and what they want to continue. <i>Aim:</i> motivation of the partner to be his own trainer                                                                                                                   |
| Booster session                     | <ul style="list-style-type: none"> <li>- repetition of two basis elements of the training: activity plan and open communication</li> </ul>                           | Partners are asked how they have fared in the past two weeks and which exercises they continued. <i>Aim:</i> reminder and consolidation of training content                                                                                       |
| <b>Optional additional sessions</b> |                                                                                                                                                                      |                                                                                                                                                                                                                                                   |
| Support of own children             | <ul style="list-style-type: none"> <li>- burdens of children</li> <li>- suggestions for a conversation about the disease/situation</li> </ul>                        | Partners are asked to write down their experience with their children and they get conversation examples. <i>Aim:</i> support with communication with children                                                                                    |
| Healthy sleep                       | <ul style="list-style-type: none"> <li>- rules for healthy sleep</li> <li>- sleeping problems</li> <li>- relaxation exercises</li> </ul>                             | Quiz about healthy sleep and sleeping problems. <i>Aim:</i> support with sleep problems                                                                                                                                                           |
| Closeness and sexuality             | <ul style="list-style-type: none"> <li>- open communication about sexuality</li> <li>- relaxation/massage exercises</li> </ul>                                       | Partners learn about other types of sexuality e.g. relaxation and closeness through massage exercises. <i>Aim:</i> removal of taboos regarding communication                                                                                      |

|                     |                                                         |                                                                                                                                                                                                                                 |
|---------------------|---------------------------------------------------------|---------------------------------------------------------------------------------------------------------------------------------------------------------------------------------------------------------------------------------|
|                     |                                                         | about sexuality and encouragement to try something new                                                                                                                                                                          |
| Existential burdens | - thinking about end of life<br>- hope, farewell, grief | Partners can write about their thoughts about the end of life and they are encouraged to write about the sense of the time together with their spouse. <i>Aim:</i> removal of taboos regarding thinking and talking about death |

### *Online Intervention Process and guidance*

After baseline assessment (T0) participants of the intervention group will get immediately access to PartnerCARE. Therefore, they will receive an e-mail with log in information for the Minddistrict platform. After log in the participant can start directly with the introduction session. At the end of each session the participant clicks on a send button and the e-coach receive a note that a session was finished. Afterwards the e-coach log in to Minddistrict, read the filled in text fields from the participant and write a feedback. The participant also receives a note via e-mail when feedback on a session is available.

The feedbacks from the e-coach will be partly standardized and individualized dependent on entries from the participant, encouraging them to stay motivated working on the intervention. Since it is aimed that e-coaches need about 10 minutes in average for writing a feedback due to time efficiency, the actual feedback time is measured. Participants will receive the feedback within the next two weekdays after completing a session. Participants can also write a personal message to the e-coach via the Minddistrict platform if they have questions or technical problems. The communication between participant and e-coach will be asynchronous. Guidance in online intervention is used to increase efficacy, adherence and decrease dropout [49,50].

### *Text Message Coach*

Participants can choose in session 1 if they want to be supported additionally with two SMS per week during the intervention (at no charge for the participant). SMS will be sent via online platform MessageBird ([www.messagebird.com](http://www.messagebird.com)). The Text Message Coach is thematically matched with the intervention and accompanies each session with two messages and after the main

1  
2  
3 sessions one message per week until the booster session (in total 15 SMS). The text messages  
4 include motivational quotes, mini-tasks and reminder of positive activities or exercises, for  
5 example “Before you go to bed tonight, look back on your day. Remember: What beautiful  
6 moments have you experienced today?”. It has been shown that SMS support may have the effect  
7 to enhance the intervention effect [51].  
8  
9  
10

### 11 *Control condition*

12  
13  
14 Participants of the waitlist control group will receive no intervention during the study phase but  
15 they are free to use other treatment options in standard care. Four months after randomization  
16 and after completing the follow-up questionnaire (T2) they will get access to the unguided version  
17 of PartnerCARE. The intervention is the same as in the intervention group and participants will  
18 have the possibility to choose the Text Message Coach in session 1 as well. But instead of  
19 individualized feedback they will receive a short automatic feedback after each session.  
20  
21  
22  
23

### 24 **Sample size/power calculation**

25  
26 Since with this study the practicality and feasibility of PartnerCARE will be evaluated as the  
27 primary outcome, a formal sample size calculation is not required. A total sample size of n= 60 (30  
28 partners per arm) was chosen as a recommendation for pilot trials [52]. Part of the feasibility  
29 study will be to explore the feasibility of recruitment and rating of the different recruitment  
30 strategies.  
31  
32  
33  
34

### 35 **Assessments**

36  
37 All Assessments will take place at the online survey platform Unipark ([www.unipark.de](http://www.unipark.de)). Table 3  
38 shows all outcomes and time points. Socio demographic variables include age, sex, marital status,  
39 nationality, education, occupational situation and number of children. In addition, clinical  
40 characteristics from the diseased partner will be assessed with single questions: cancer diagnosis,  
41 date of diagnosis, phase of the disease and current medical treatments. Participants will be  
42 reminded via email to complete surveys if they do not respond to invitation email.  
43  
44  
45  
46  
47

### 48 **Primary Outcome**

49  
50 Primary Outcome of this pilot RCT study is the feasibility of the PartnerCARE online intervention.  
51 To characterize the different aspects of feasibility a variety of questionnaires will be used. The  
52 measurement of feasibility will be composed of satisfaction with the online intervention, possible  
53 negative effects, attitudes toward psychological online interventions, evaluation of the SMS-  
54 Coach, individual feedback from participants, processing duration of the sessions (via feedback  
55 from participants), participant flow, drop-out rates, duration of the intervention, effort from the  
56 e-Coaches and technical difficulties.  
57  
58  
59  
60

1  
2  
3 User Satisfaction with web-based health interventions will be measured with the *Client*  
4 *Satisfaction Questionnaire adapted to Internet-based interventions (CSQ-I)* [53]. Eight items are  
5 rated on a four-point Likert-Scale from 1 (“does apply to me”) to 4 (“does totally apply to me”)  
6 which leads to a sum score range from 8 to 32. The scale demonstrated good reliability and  
7 construct validity. The CSQ-I is being only submitted to the IG post treatment and follow up.  
8  
9

10  
11  
12 Possible negative effects of the online intervention will be assessed with an online adapted  
13 version of the *Inventory for the Assessment of Negative Effects in Psychotherapy (INEP)* [54]. The  
14 original 21 items were adapted at the online setting by modifying text (“online intervention”  
15 instead of “therapy”) and replacing items about the relationship between participant and  
16 therapist with items about the e-coach. The adjusted inventory consists of 8 items with a 7-step  
17 bipolar format (-3 = “definitely a negative effect”; 0 = “unchanged”; +3 = “definitely a positive  
18 effect”) and 14 items with a 4-step unipolar format (from 0= “strongly disagree” to 3= “fully  
19 agree”). Additionally, the first 17 items record whether any negative effect is attributed on the  
20 online intervention or on other circumstances in life. For the last 5 items there is an open question  
21 in what way the statement applies. The internal consistency for the original INEP was good  
22 ( $\alpha=.86$ ). Participants of the IG will receive the online adapted version of the INEP (INEP-On) post  
23 treatment and follow up. In contrast, participants of the CG will receive an abridged and adjusted  
24 INEP version with 14 items (INEP-CG) about the participation in the study and whether any  
25 negative effect is attributed on the participation in the study or on other circumstances in life post  
26 treatment and follow- up. Both questionnaires include the question “Since or during the online  
27 intervention/participation of the study I had suicidal thoughts/intentions for the first time.”.  
28 Participants who score with 1 (“agree a little bit”) receive automatically an email with information  
29 about available health care services in case of emergency. They are advised to seek for help if the  
30 symptoms increase. Participants who score 2 or 3 (“agree partly” or “fully agree”) receive likewise  
31 the automatically emergency email and additionally a psychotherapist of the study management  
32 call the participant to clarify if they distance themselves from suicidal ideation.  
33  
34  
35  
36  
37  
38  
39  
40  
41  
42  
43  
44  
45

46 The attitude towards online interventions will be assessed with the *Attitudes towards*  
47 *Psychological Online Interventions Questionnaire (APOI)* [55]. The APOI consists of 16 five-step  
48 items (from 1 =“totally agree” to 5 =“totally disagree”) which can be integrated into four subscales:  
49 Scepticism and Perception of Risks (SCE), Confidence in Effectiveness (CON), Technologization  
50 Threat (TET) and Anonymity Benefits (ABE), with a theoretical range of 4 to 20 for each subscale.  
51 The total sum score ranges from 16 to 80 whereas higher scores imply a positive attitude towards  
52 online interventions. The medians of the scales can be used to classify the scores (56 for the total  
53 sum score, 9 for SCE, 16 for CON, 12 for TET and 12 for ABE). Cronbach’s’ alpha with  $\alpha=.77$  shows  
54 an acceptable to good internal consistency. The APOI is given to all participants at all three  
55 measurement points.  
56  
57  
58  
59  
60

1  
2  
3 The SMS Coach will be evaluated with three items at post treatment from participants of  
4 the IG: “The SMS Coach was helpful.”, “The content of the SMS was pleasant.” and “The SMS Coach  
5 was motivating.”. The items are scored on a five-point scale from 1 (“never”) to 5 (“always”).  
6  
7

8  
9 After each finished PartnerCARE session at the Minddistrict platform the participants will  
10 have the possibility to give individual feedback to the session. First, they can rate the session from  
11 1 (“did not like at all”) to 10 (“did like very much”). One question is about the scope of the session  
12 (“too extensive”, “too short”, “just right”). Then four open questions ask about which exercise was  
13 most helpful, what was positive, what could be improved and how long took it to complete the  
14 session.  
15  
16  
17

18  
19 Participant flow and drop-out rates will be recorded during the study period. Duration of  
20 the intervention for each participant, effort from the e-coach (needed time for written feedback  
21 and quantity of sent reminders) and technical difficulties are collected by the e-coach.  
22  
23

### 24 **Secondary Outcomes**

25  
26 The *NCCN Distress Thermometer (DT)* which has been developed by the National  
27 Comprehensive Cancer Network (NCCN) is a valid and reliable measure of psychological distress  
28 [56,57]. It consists of a single item with a scale from 0 (“no distress”) to 10 (“extreme distress”),  
29 illustrated by a thermometer and a list of 36 potential problems which can cause distress  
30 (rationed into five categories: practical problems, family problems, emotional problems,  
31 spiritual/religious concerns and physical problems; all rated with yes/no). A cut off value of 5 or  
32 higher is recommended for a clinically significant level of distress.  
33  
34  
35  
36  
37

38  
39 The German version of the *Patient Health Questionnaire (PHQ-8)* is a reliable and valid self-  
40 report tool for assessing current depression symptoms [58]. Given that the online intervention is  
41 preventive and does not focus on depression or suicidality, the PHQ-8 will be used instead of the  
42 PHQ-9 to assess depressive symptoms as secondary outcome. In this case the PHQ-8 is an  
43 acceptable alternative to the PHQ-9. The sensitivity, specificity and positive predictive value of the  
44 PHQ-8 is comparable to the PHQ-9 [59]. The questionnaire consisting of eight items asks about  
45 impairments of the last two weeks and the items are scored on a 4-point Likert scale from 0 (“not  
46 at all”) to 3 (“nearly every day”) with a total range from 0 to 24. Higher values indicate increased  
47 severity of symptoms and a cut-off point of  $\geq 10$  is defined for current depression symptoms [58].  
48  
49  
50  
51  
52

53  
54 The *Generalized Anxiety Disorder Questionnaire (GAD-7)* is a valid and efficient tool for  
55 assessing symptoms of a generalized anxiety disorder [60]. The seven items are scored on a 4-  
56 point Likert scale from 0 (“not at all”) to 3 (“nearly every day”), a total score from 0 to 21 is  
57 possible. Like for the PHQ-8 a cut-off point of  $\geq 10$  is recommended to screen for symptoms of a  
58  
59  
60

1  
2  
3 generalized anxiety disorder. The reported internal consistency in a German sample is Cronbach  
4  $\alpha=.89$  [61].  
5  
6

7 Quality of life will be assessed with the *Veterans RAND 12-Item Health Survey (VR-12)*, an  
8 abbreviated version of the Veterans RAND 36 Items Health Survey (VR-36) which was developed  
9 on the basis of the validated SF-36 (Short form 36 health survey) questionnaire [62,63]. The VR-  
10 12 consists of different scaled questions (3 point-scale, 5 point-scale and 6 point-scale) with  
11 different rating descriptions. The 12 Items can be separated into two scores: Physical and Mental  
12 Health. Standard norms of the summary scores are available for the U.S. population: Mean for  
13 physical health summary  $M=48.60$  ( $SD=11.1$ ) and for mental health summary  $M=51.01$  ( $SD=10.0$ )  
14 [64].  
15  
16  
17  
18  
19

20 The *Short Version of the Burden Scale for Family Caregivers (BSFC-s)* will be used to assess  
21 the amount of burden in caregivers [65,66]. The ten items are rated on a scale from 0 (“strongly  
22 disagree”) to 3 (“strongly agree”). The score can range from 0 to 30, where higher scores indicate  
23 greater caregiver burden. For interpreting the BSFC-s scores a classification system was  
24 developed: 0-4 means “none to low” burden, 5-14 means “moderate” burden and 15-30 means  
25 “severe to very severe” burden [66]. Cronbach’s alpha for the complete scale is with  $\alpha=.92$  very  
26 high [65].  
27  
28  
29  
30  
31

32 Fear of Progression in spouse caregivers will be assessed with the German Version of the  
33 *Fear of Progression in Partners of Chronically Ill Patients (FoP-Q-SF/P; German: PA-F-P-KF)* [67].  
34 The 12 items are responded on a five-point Likert Scale from 1 (“not at all”) to 5 (“very much”).  
35 The scale will be evaluated through addition of the items, whereupon higher values shows higher  
36 fear of progression. A cut-off with 34 or higher indicates dysfunctional fear of progression. The  
37 internal consistency of the complete scale is high (Cronbach  $\alpha=.87$ ).  
38  
39  
40  
41  
42

43 The *ENRICHED Social Support Inventory (ESSI)* is a short questionnaire to assess the  
44 perceived emotional social support [68,69]. The five items are measured with a five-point scale  
45 (1=“at no time” to 5=“always”) with a minimum of 5 and a maximum of 25. The internal  
46 consistency of the scale is  $\alpha=.89$ . For the definition lack of social support, the value of 18 was  
47 appointed.  
48  
49  
50

51 The received social support will be assessed with the three-item *Oslo social support scale*  
52 (*OSS-3*) [70]. The questionnaire consists of one question with a four-point scale and two questions  
53 with a five-point scales with different descriptions. The evaluation is based on the sum score of  
54 the raw scores (3 to 14). A score of 3-8 can be interpreted as ‘poor support’, 9-11 as ‘moderate  
55 support’ and 12-14 as ‘strong support’ respectively. The internal consistency with  $\alpha=.64$  is  
56 acceptable considering the number of items [71]. While loneliness can be an important challenge  
57  
58  
59  
60

for caregivers [72], we added one question about loneliness to this questionnaire: 'How lonely do you feel at the moment?' with a five-point-scale from 1 ("not at all") to 5 ("very much").

The German version of the *Generalized Self-Efficacy scale (GSE, German: SWE)* measures the perceived self-efficacy [73]. This one-dimensional scale was primary developed for students and teachers, but is also used in cancer context [74,75]. The 10 Items had a response range from 1 ("not at all true") to 4 ("exactly true"). The internal consistency is  $\alpha=.86$  and the validity is confirmed by numerous findings [76].

Coping will be assessed with the German Version of the *BriefCOPE (Brief Coping Orientation to Problems Experienced) Inventory* [77,78]. It consists of 28 items which are rated on a four-point Likert-Scale ranged from 1 ("not at all") to 4 ("very much"). The questionnaire is divided in 14 subscales, each represented by two items. The internal consistency for the subscales ranges from  $\alpha=.50$  to  $\alpha=.90$ .

Table 3 Overview of the assessments

| Instruments                          | Aim                                                                     | Time of measurement |    |    |
|--------------------------------------|-------------------------------------------------------------------------|---------------------|----|----|
|                                      |                                                                         | T0                  | T1 | T2 |
| <b>Primary Outcome - feasibility</b> |                                                                         |                     |    |    |
| CSQ-I <sup>a</sup>                   | Participant satisfaction                                                |                     | ✓  | ✓  |
| INEP-On/INEP-CG                      | Negative effects online Interventions (IG) /participation in study (CG) |                     | ✓  | ✓  |
| APOI                                 | Attitudes psychological interventions                                   | ✓                   | ✓  | ✓  |
| Dropout rate                         | Participant adherence                                                   |                     | ✓  | ✓  |
| Evaluation SMS-Coach <sup>a</sup>    | SMS-Coach satisfaction                                                  |                     | ✓  |    |
| <b>Secondary Outcome</b>             |                                                                         |                     |    |    |
| DT                                   | Distress                                                                | ✓                   | ✓  | ✓  |
| PHQ-8                                | Depression                                                              | ✓                   | ✓  | ✓  |
| GAD-7                                | Anxiety                                                                 | ✓                   | ✓  | ✓  |
| VR-12                                | Quality of life                                                         | ✓                   | ✓  | ✓  |
| BSFC-s                               | Caregiver burden                                                        | ✓                   | ✓  | ✓  |
| PA-F-P-KF                            | Fear of progression                                                     | ✓                   | ✓  | ✓  |



|    |            |                         |   |   |   |
|----|------------|-------------------------|---|---|---|
| 3  | ESSI       | Perceived emotional     | ✓ | ✓ | ✓ |
| 4  |            | social support          |   |   |   |
| 6  | OSS-3      | Received social support | ✓ | ✓ | ✓ |
| 8  | SWE        | General self-efficacy   | ✓ | ✓ | ✓ |
| 9  |            | expectation             |   |   |   |
| 11 | Brief COPE | Coping                  | ✓ | ✓ | ✓ |
| 13 | Loneliness | Feeling lonely          | ✓ | ✓ | ✓ |

---

#### Other assessments

---

|    |                          |                           |   |   |   |
|----|--------------------------|---------------------------|---|---|---|
| 16 | Socio-demographics       | Age, sex, occupation,     | ✓ |   |   |
| 17 |                          | children                  |   |   |   |
| 19 | Clinical characteristics | Diagnosis, onset, disease | ✓ |   |   |
| 20 | patient                  | phase, current treatment  |   |   |   |
| 23 | Psychotherapy            |                           | ✓ | ✓ | ✓ |
| 24 | (yes/no, how long)       |                           |   |   |   |

T0: Baseline, T1: 2 months, T2: 4 months; <sup>a</sup> Recorded in intervention group only

CSQ-I: Client Satisfaction Questionnaire adapted to internet-based interventions, INEP-On/INEP-CG: Inventory of negative effects in psychotherapy – online/-control group, APOI: Attitudes towards Psychological Online Interventions Questionnaire, DT: Distress Thermometer, PHQ-8: Patient Health Questionnaire, GAD-7: Generalized Anxiety Disorder, VR-12: Veterans RAND 12-item Health Survey, BSFC-s: Short version of the Burden Scale for family caregivers, PA-F-P-KF: Fear of progression questionnaire for partners, ESSI: ENRICH-D-Social-Support-Instrument, OSS-3: Oslo social support scale, SWE: general self-efficacy expectation scale, Brief COPE: abbreviated version of the COPE (Coping Orientation to Problems Experienced) Inventory

#### Patient and public involvement

Before start of the feasibility trial, psycho oncologists and partners of cancer patients were invited to value the main sessions of PartnerCARE. Since only four psycho oncologists responded to the request, only the feedback from these four psycho oncologists could be included in the development process. As a subsequent step, feedback from participants of the feasibility study will be used to further optimize the online intervention for the following efficacy evaluation study. We intend to disseminate the main results of the feasibility study with a short report at suitable platforms where partners of patients with cancer are reached (e.g. online communities).

#### Statistical analysis

Demographic data will be reported using descriptive statistics. A chart of participant flow during the whole study will be plotted. Quantity of drop-out and reasons for drop-out will be displayed. With basic psychometric analyses the scale structure and internal consistency of the used questionnaires will be verified. Chi-square (for categorical variables) and t-tests will be performed to analyse whether randomization lead to comparable groups with no significant differences at baseline. Before starting with the analyses, we will examine if the data is normally



distributed, else we will use a non-parametric test. The significance level for all analyses will be  $p \leq .05$ .

All statistical analyses will be performed based on the intention-to-treat principle with multiple imputations to replace missing data. Per-protocol analyses for the considerably completers will be additionally conducted to investigate the influence of intervention attrition on study results.

Qualitative individual feedback from participants via the Minddistrict platform regarding to the feasibility and acceptance of the online intervention will be summarized. Feasibility measurements from the online questionnaire will be analysed descriptive (INEP-On; drop-out) and with t-test (APOI; CSQ-I (only in IG)).

To test a potential intervention effect, i.e. an indication for the potential efficacy of PartnerCARE, continuous outcome parameters at post-treatment (T1) will be analysed using an analyses of covariance (ANCOVA), controlling for the baseline measurement (T0) and further covariates (e.g. age, sex). For follow-up (T2) effects a repeated measure analyses of covariance will be conducted with time as the within-subject factor (baseline vs. post-treatment vs. follow-up) and group as the between subject-factor (IG vs. CG). In the case of a significant main effect, post hoc tests will be conducted to analyse between which measurement points the significant differences exist. Cohen's d will be calculated to report effect sizes (effect sizes smaller than .32 are considered small, .33-.55 are considered moderate, and those larger than .56 are considered large [79]).

## Discussion

Partners of patients with cancer are confronted with a variety of challenges and new, additional tasks regarding the disease, resulting in a decrease of mental health. These burdens are often overlooked and psycho-oncological support or specific interventions for partners are rare. The online intervention PartnerCARE was developed to provide tailored support for partners of patients with cancer. The main propose of the feasibility study is to evaluate the feasibility and acceptance of PartnerCARE and of the study process itself through a randomized controlled trial. Furthermore, we aim at gaining first preliminary evidence for the potential efficacy of the online intervention which is hoped to pave the way for a comprehensive efficacy evaluation study. An online intervention is, from our point of view, particularly suitable for partners because of the flexibility (time and place independency), easy accessibility, possible anonymity and low-threshold format. We expect that the online intervention facilitates access to psychosocial services for partners with hitherto low utilization of conventional face-to-face psychosocial care (e.g. because of logistic and time reasons, discomfort or other objections towards psychosocial services or gender-related reasons)[17,18]. Although to date there is evidence that the majority of online

1  
2  
3 intervention users are female [17] and female caregivers are more negatively affected by the  
4 caregiving process [1], male caregivers should not be neglected. We assume that online  
5 interventions could suit particularly for male caregivers, because of their tendency to have to be  
6 strong (no public searching for help) and their potential difficulties to express their concerns and  
7 emotions (could be easier for them in an online setting) [10]. There is recent research about an  
8 online intervention especially for male caregivers [33], but definitely more research is needed to  
9 investigate specific needs of male caregivers and how to better reach male participants for online  
10 interventions.  
11  
12

13  
14  
15  
16 Recruitment of partners of patients with cancer can be challenging due to the fact that partners  
17 are often busy and therefore not reached at the clinic, recruitment via patient is not always  
18 effective (information is not passed to the partner) and there are not many typical areas where  
19 partners can be reached. Recruitment rates for caregivers of cancer patients tended to be poor  
20 and varied from 20% to 66% [16]. To overcome the challenges of recruitment we try to use a wide  
21 variety of online and offline recruitment strategies and will evaluate their adequacy.  
22  
23  
24  
25

26  
27 PartnerCARE is the first online interventions for partners of patients with cancer available in  
28 German language. The newly developed online intervention for partners of patients with cancer  
29 is adjusted to the needs of cancer caregivers and takes several persuasive principles into account.  
30 The online intervention uses a variety of different elements (relevant topics, varying exercises,  
31 practical tips, guided imagery exercises) to motivate participants to go on with the intervention.  
32 If the pilot study verifies the feasibility and acceptance of PartnerCARE it is conceivable to  
33 translate PartnerCARE in different languages and evaluate the online intervention in further  
34 studies worldwide.  
35  
36  
37  
38  
39

40  
41 With this pilot study we will initiate a continuous development and evaluation process of the  
42 online intervention PartnerCARE. During the online intervention we assess satisfaction, positive  
43 and negative estimations of the intervention via written feedback. These insights from partners  
44 of persons with cancer will be used to improve and further develop PartnerCARE to an even more  
45 user tailored intervention. We also will assess possible negative effects in our RCT, to evaluate  
46 potential side effects of the online intervention for partners. The measurement of e-coach time for  
47 feedback every week and quantity of sent reminders will give a first insight in the estimation of  
48 costs for the online intervention for implementation in usual health care.  
49  
50  
51  
52  
53

54  
55 A few limitations need to be taken into consideration. As all outcomes will be assessed via self-  
56 report and the contact with participants is only online, there is uncertainty regarding the identity  
57 of the participants. With signed informed consent and control questions with automatic  
58 premature termination at the first online assessment this problem will be reduced. Online  
59 interventions in general and online interventions specifically for caregivers have to face with high  
60

1  
2  
3 dropout rates (29% to 38%) [80,81]. To reduce a potential adherence problem and to enhance  
4 motivation the participants of the intervention group will be accompanied by an e-coach with  
5 feedback and reminders [50,82] and the development of the online design includes persuasive  
6 elements [42]. As participation in the study is only possible with access to internet and some  
7 technical affinity, we designed the online intervention as simple and intuitive as possible and will  
8 offer technical use basics at the introduction session. Furthermore, it has been discussed that  
9 including a waitlist control condition leads to an overestimation of the effect sizes compared to a  
10 no treatment or psychological placebo condition [83]. However, all participants in our study will  
11 be free to use care as usual and they receive a list of other treatment options like cancer  
12 counselling centres if they are interested. Furthermore, we will be able to have a look on possible  
13 long-term effects (4-month follow up), but this leads to a long waiting time for the waitlist control  
14 group. In addition, our online intervention for partners could not cover all relevant topics: A  
15 recent study showed 'home care interventions', 'impact of financial demands on caregiver, 'impact  
16 of health reforms, programs and policies on caregivers' as some of the most important topics for  
17 caregivers [84]. The further development of PartnerCARE should take these insights into account.

18  
19  
20  
21  
22  
23  
24  
25  
26  
27  
28 Regarding the future outlook, PartnerCARE could be included into the health care routine: by the  
29 time a patient becomes diagnosed with cancer, also the partner should be screened for psycho-  
30 social and physical burdens. PartnerCARE can also provide a communicative benefit for health  
31 care professionals with enhanced awareness of caregivers and the opportunity of having a special  
32 offer for partners. If needed, PartnerCARE could be immediately offered as a tool for partners to  
33 work on their burdens regardless of where and when. It can also be used to overcome the waiting  
34 time for partners until a local psycho-oncological treatment is available.  
35  
36  
37  
38  
39  
40  
41

## 42 **Abbreviations**

43  
44 ABE: Anonymity Benefits (Subscale of APOI); ANOVA: Analysis of Variance; APOI: Attitudes  
45 towards Psychological Online Interventions Questionnaire; BriefCOPE: Brief Coping Orientation  
46 to Problems Experienced Inventory; BSFC-s: Short Version of the Burden Scale for Family  
47 Caregivers; CCC: Comprehensive Cancer Center; CG: Waitlist control group; CON: Confidence in  
48 Effectiveness (Subscale of APOI); CONSORT: Consolidated Standards of Reporting Trials; CSQ-I:  
49 Client Satisfaction Questionnaire adapted to Internet-based interventions; DT: National  
50 Comprehensive Cancer Network Distress Thermometer; ESSI: ENRICHED Social Support  
51 Inventory; FoP-Q-SF/P: Fear of Progression in Partners of Chronically ill Patients; GAD-7:  
52 Generalized Anxiety Disorder Questionnaire; GSE: Generalized Self-Efficacy scale; IG: Intervention  
53 group; INEP-On/-CG: Inventory for the Assessment of Negative Effects in Psychotherapy –  
54 Online/-Control group; NCCN: National Comprehensive Cancer Network; OSS-3: Oslo social  
55  
56  
57  
58  
59  
60

1  
2  
3 support scale; PHQ-8/9: Patient Health Questionnaire; RCT: Randomized controlled trial; SCE:  
4 Scepticism and Perception of Risk (Subscale of APOI); SF-36: Short form 36 health survey  
5 questionnaire; SMS: Short Message Service; SPIRIT: Standard Protocol Items: Recommendations  
6 for Interventional Trials; TAU: Treatment as usual; TET: Technologization Threat (Subscale of  
7 APOI); VR-12: Veterans RAND 12-Item Health Survey; VR-36: Veterans RAND 36 Items Health  
8 Survey  
9  
10  
11  
12

## 13 **Declarations**

### 14 **Ethics approval and consent to participate**

15  
16 This study was approved by the Ethics Committee of the University of Ulm (no. 390/18) and was  
17 registered in the German Clinical Trials Register ([DRKS00017019](https://www.drks.de/DRKS00017019)) on 08 April 2019. In case of  
18 important protocol modifications, trial registration will be updated. All participants receive  
19 written information about study process, data security and voluntariness of participation. Prior  
20 to the involvement into the study participants have to confirm understanding of the given  
21 information with written consent. Data collection occur pseudonymized by giving every  
22 participant a personal ID and data is stored password protected. Access to study data will only be  
23 given to authorized study members. After data collection all personal information of participants  
24 will be deleted.  
25  
26  
27  
28  
29  
30  
31  
32

### 33 **Consent for publication**

34 Not applicable.  
35  
36  
37

### 38 **Availability of data and materials**

39 All principal investigators will be given full access to the data sets. Data set will be stored on  
40 password-protected servers of Ulm University with restricted access. External researches may get  
41 access to the final trial dataset on request depending on to be specified data security and data  
42 exchange regulation agreements. To ensure confidentiality, data dispersed to any investigator or  
43 researcher will be blinded of any identifying participant information.  
44  
45  
46  
47  
48

### 49 **Competing interests**

50 The authors declare that they have no competing interests.  
51  
52  
53

### 54 **Funding**

55 This work was supported by a grant from the German Cancer Aid to the Comprehensive Cancer  
56 Center Ulm (grant number: 70112209). The German Cancer Aid had no role in study design,  
57 decision to publish or preparation of this manuscript. The German Cancer Aid will not be involved  
58  
59  
60

1  
2  
3 in data collection, analyses, decision to publish or preparation of future papers regarding the  
4 PartnerCARE project.  
5

### 6 7 **Author contributions**

8  
9 DB, NB, HG, HB and KH contributed to the study design. DB and IL compiled the content of the  
10 intervention sessions. The online design and structure of the intervention was carried out from  
11 DB building on prior online interventions of the department of Clinical Psychology and  
12 Psychotherapy (HB). Intervention development was supervised by NB, HG, HB and KH. DB is  
13 responsible for recruitment and coordination of the study. DB drafted the manuscript. All authors  
14 provided critical revision and approved the final manuscript.  
15  
16  
17  
18

### 19 20 **Acknowledgements**

21  
22 Authors would like to thank Sabrina Heil for her engagement in enrolling participants and for her  
23 support in study organization. Furthermore, authors thank Daniel Neveling for his support as e-  
24 coach and Miriam Stock for providing the imaginative audio files. Authors also thank Eileen  
25 Bendig for her supporting role in planning the trial process, Ann-Marie Kuechler for her support  
26 at the Minddistrict Platform as well as Robin Kraft and Sebastian Broetzler for creating the  
27 PartnerCARE homepage. Special thanks go to the psycho oncologists who valued the PartnerCARE  
28 sessions and thus support the enhancement of the intervention.  
29  
30  
31  
32  
33  
34  
35  
36  
37  
38  
39  
40  
41  
42  
43  
44  
45  
46  
47  
48  
49  
50  
51  
52  
53  
54  
55  
56  
57  
58  
59  
60

## References

- 1 Li QP, Mak YW, Loke AY. Spouses' experience of caregiving for cancer patients: A literature review. *Int Nurs Rev* 2013;**60**:178–87.
- 2 Popek V, Hönig K. Cancer and family: tasks and stress of relatives. *Nervenarzt* 2015;**86**:266–8.
- 3 Pitceathly C, Maguire P. The psychological impact of cancer on patients' partners and other key relatives: A review. *Eur J Cancer* 2003;**39**:1517–24.
- 4 Stenberg U, Ruland C, Miaskowski C. Review of the literature on the effects of caring for a patient with cancer. *Psychooncology* 2010;**19**:1013–25.
- 5 Goren A, Gilloteau I, Lees M, *et al.* Quantifying the burden of informal caregiving for patients with cancer in Europe. *Support Care Cancer* 2014;**22**:1637–46.
- 6 Bergelt C, Koch U, Petersen C. Quality of life in partners of patients with cancer. *Qual Life Res* 2008;**17**:653–63.
- 7 Mitchell AJ, Ferguson DW, Gill J, *et al.* Depression and anxiety in long-term cancer survivors compared with spouses and healthy controls: A systematic review and meta-analysis. *Lancet Oncol* 2013;**14**:721–32.
- 8 Sklenarova H, Krümpelmann A, Haun MW, *et al.* When do we need to care about the caregiver? Supportive care needs, anxiety, and depression among informal caregivers of patients with cancer and cancer survivors. *Cancer* 2015;**121**:1513–9.
- 9 Rosenberger C, Höcker A, Cartus M, *et al.* Outpatient Psycho-Oncological Care for Family Members and Patients: Access, Psychological Distress and Supportive Care Needs. *PPmP Psychother Psychosom Medizinische Psychol* 2012;**62**:185–94.
- 10 Lopez V, Copp G, Molassiotis A. Male Caregivers of Patients With Breast and Gynecologic Cancer. *Cancer Nurs* 2012;**35**:402–10.
- 11 Northouse L, Katapodi M, Song L, *et al.* Interventions with family caregivers of cancer patients: Meta-Analysis of randomized trials. *CA Cancer J Clin* 2011;**60**:317–39.
- 12 Applebaum AJ, Breitbart W. Care for the cancer caregiver : A systematic review. *Palliat Support Care* 2013;**11**:231–52.
- 13 Kleine A-K, Hallensleben N, Mehnert A, *et al.* Psychological interventions targeting partners of cancer patients: A systematic review. *Crit Rev Oncol Hematol* 2019;**140**:52–66.
- 14 O'Toole MS, Zachariae R, Renna ME, *et al.* Cognitive behavioral therapies for informal caregivers of patients with cancer and cancer survivors: a systematic review and meta-analysis. *Psychooncology* 2017;**26**:428–37.
- 15 Ugalde A, Gaskin CJ, Rankin NM, *et al.* A systematic review of cancer caregiver interventions: Appraising the potential for implementation of evidence into practice. *Psychooncology* 2019;**28**:687–701.
- 16 Heynsbergh N, Heckel L, Botti M, *et al.* Feasibility, useability and acceptability of technology-based interventions for informal cancer carers: A systematic review. *BMC Cancer* 2018;**18**:244.
- 17 Kaltenbaugh J. D, Klem Lou M, Hu L, *et al.* Using Web-Based Interventions to Support Caregivers of Patients With Cancer: A Systematic Review. *Oncol Nurs Forum* 2015;**42**:156–64.
- 18 Sinfield P, Baker R, Ali S, *et al.* The needs of carers of men with prostate cancer and



- 1  
2  
3 barriers and enablers to meeting them: A qualitative study in England. *Eur J Cancer Care*  
4 *(Engl)* 2012;**21**:527–34.
- 5  
6 19 Sin J, Henderson C, Spain D, *et al.* eHealth interventions for family carers of people with  
7 long term illness: A promising approach? *Clin Psychol Rev* 2018;**60**:109–25.
- 8  
9 20 Griffiths F, Lindenmeyer A, Powell J, *et al.* Why are health care interventions delivered  
10 over the internet? A systematic review of the published literature. *J Med Internet Res*  
11 2006;**8**:e10.
- 12  
13 21 Heynsbergh N, Botti M, Heckel L, *et al.* Caring for the person with cancer and the role of  
14 digital technology in supporting carers. *Support Care Cancer* 2019;**27**:2203–9.
- 15  
16 22 Köhle N, Drossaert CHC, Van Uden-Kraan CF, *et al.* Intent to use a web-based  
17 psychological intervention for partners of cancer patients: Associated factors and  
18 preferences. *J Psychosoc Oncol* 2018;**36**:203–21.
- 19  
20 23 Köhle N, Drossaert CH, Oosterik S, *et al.* Needs and Preferences of Partners of Cancer  
21 Patients Regarding a Web-Based Psychological Intervention: A Qualitative Study. *JMIR*  
22 *Cancer* 2015;**1**:e13.
- 23  
24 24 Bundesministerium für Gesundheit. Nationaler Krebsplan: Handlungsfelder, Ziele,  
25 Umsetzungsempfehlungen und Ergebnisse.  
26 2017.[https://www.bundesgesundheitsministerium.de/fileadmin/Dateien/5\\_Publikationen/](https://www.bundesgesundheitsministerium.de/fileadmin/Dateien/5_Publikationen/Praevention/Broschueren/Broschuere_Nationaler_Krebsplan.pdf)  
27 [Praevention/Broschueren/Broschuere\\_Nationaler\\_Krebsplan.pdf](https://www.bundesgesundheitsministerium.de/fileadmin/Dateien/5_Publikationen/Praevention/Broschueren/Broschuere_Nationaler_Krebsplan.pdf) (accessed 5 Jun  
28 2019).
- 29  
30 25 Leitlinienprogramm Onkologie (Deutsche Krebsgesellschaft, Deutsche Krebshilfe,  
31 AWMF): Psychoonkologische Diagnostik, Beratung und Behandlung von erwachsenen  
32 Krebspatienten, Langversion 1.1. 2014.[https://www.leitlinienprogramm-](https://www.leitlinienprogramm-onkologie.de/fileadmin/user_upload/Downloads/Leitlinien/Psychoonkologieleitlinie_1.1/LL_PSO_Langversion_1.1.pdf)  
33 [onkologie.de/fileadmin/user\\_upload/Downloads/Leitlinien/Psychoonkologieleitlinie\\_1.1/](https://www.leitlinienprogramm-onkologie.de/fileadmin/user_upload/Downloads/Leitlinien/Psychoonkologieleitlinie_1.1/LL_PSO_Langversion_1.1.pdf)  
34 [LL\\_PSO\\_Langversion\\_1.1.pdf](https://www.leitlinienprogramm-onkologie.de/fileadmin/user_upload/Downloads/Leitlinien/Psychoonkologieleitlinie_1.1/LL_PSO_Langversion_1.1.pdf) (accessed 5 Jun 2019).
- 35  
36 26 Schulz H, Bleich C, Bokemeyer C, *et al.* Psychoonkologische Versorgung in Deutschland :  
37 Bundesweite Bestandsaufnahme und Analyse.  
38 2018.[https://www.bundesgesundheitsministerium.de/fileadmin/Dateien/5\\_Publikationen/](https://www.bundesgesundheitsministerium.de/fileadmin/Dateien/5_Publikationen/Gesundheit/Berichte/PsoViD_Gutachten_BMG_19_02_14_gender.pdf)  
39 [Gesundheit/Berichte/PsoViD\\_Gutachten\\_BMG\\_19\\_02\\_14\\_gender.pdf](https://www.bundesgesundheitsministerium.de/fileadmin/Dateien/5_Publikationen/Gesundheit/Berichte/PsoViD_Gutachten_BMG_19_02_14_gender.pdf) (accessed 21 Jun  
40 2019).
- 41  
42 27 Mehnert A, Koranyi S. Psychooncological Care: A Challenge. *Dtsch Medizinische*  
43 *Wochenschrift* 2018;**143**:316–23.
- 44  
45 28 Northouse LL, Schafenacker A, Barr KLC, *et al.* A tailored Web-based psychoeducational  
46 intervention for cancer patients and their family caregivers. *Cancer Nurs* 2014;**37**:321–  
47 30.
- 48  
49 29 Song L, Rini C, Deal AM, *et al.* Improving couples' quality of life through a Web-based  
50 prostate cancer education intervention. *Oncol Nurs Forum* 2015;**42**:183–92.
- 51  
52 30 Scott K, Beatty L. Feasibility study of a self-guided cognitive behaviour therapy internet  
53 intervention for cancer carers. *Aust J Prim Health* 2013;**19**:270–4.
- 54  
55 31 Applebaum AJ, Buda KL, Schofield E, *et al.* Exploring the cancer caregiver's journey  
56 through web-based Meaning-Centered Psychotherapy. *Psychooncology* 2018;**27**:847–56.
- 57  
58 32 Duggleby W, Ghosh S, Struthers-Montford K, *et al.* Feasibility Study of an Online  
59 Intervention to Support Male Spouses of Women With Breast Cancer. *Oncol Nurs Forum*  
60 2017;**44**:765–75.
- 33 Levesque J V., Gerges M, Girgis A. The development of an online intervention (Care Assist)



- 1  
2  
3 to support male caregivers of women with breast cancer: A protocol for a mixed methods  
4 study. *BMJ Open* 2018;**8**:7–9.  
5
- 6 34 Köhle N, Drossaert CH, Schreurs KM, *et al.* A web-based self-help intervention for partners  
7 of cancer patients based on Acceptance and Commitment Therapy: a protocol of a  
8 randomized controlled trial. *BMC Public Health* 2015;**15**:303.  
9
- 10 35 Eldridge S, Chan C, Campbell M, *et al.* CONSORT 2010 statement: extension to randomized  
11 pilot and feasibility trials. *Pilot feasibility Stud* 2016;**2**:64–96.  
12
- 13 36 Proudfoot J, Klein B, Barak A, *et al.* Establishing guidelines for executing and reporting  
14 internet intervention research. *Cogn Behav Ther* 2011;**40**:82–97.  
15
- 16 37 Chan A, Tetzlaff JM, Altman DG, *et al.* SPIRIT 2013 Statement : Defining Standard Protocol  
17 Items for Clinical Trials. *Ann Intern Med* 2013;**158**:200–7.  
18
- 19 38 Weis J, Heckl U, Brocai D, *et al.* *Psychoedukation mit Krebspatienten - Therapiemanual für*  
20 *eine strukturierte Gruppenintervention.* Stuttgart: : Schattauer 2006.  
21
- 22 39 Lin J, Paganini S, Sander L, *et al.* An Internet-Based Intervention for Chronic Pain. *Dtsch*  
23 *Aerzteblatt Online* 2017;**114**:681–8.  
24
- 25 40 Oinas-Kukkonen H, Harjumaa M. Persuasive systems design: Key issues, process model,  
26 and system features. *Commun Assoc Inf Syst* 2009;**24**:485–500.  
27
- 28 41 Kelders SM, Kok RN, Ossebaard HC, *et al.* Persuasive system design does matter: A  
29 systematic review of adherence to web-based interventions. *J Med Internet Res*  
30 2012;**14**:e152.  
31
- 32 42 Baumeister H, Kraft R, Baumel A, *et al.* Persuasive e-health design for behavior change. In:  
33 *Digital Phenotyping and Mobile Sensing: New Developments in Psychoinformatics.* Berlin: :  
34 Springer 2019.  
35
- 36 43 Jaspers MWM, Steen T, Bos C Van Den, *et al.* The think aloud method: A guide to user  
37 interface design. *Int J Med Inform* 2004;**73**:781–95.  
38
- 39 44 Lambert SD, Harrison JD, Smith E, *et al.* The unmet needs of partners and caregivers of  
40 adults diagnosed with cancer: a systematic review. *BMJ Support Palliat Care* 2012;**2**:224–  
41 30.  
42
- 43 45 Marcotte J, Tremblay D, Turcotte A, *et al.* Needs-focused interventions for family  
44 caregivers of older adults with cancer: a descriptive interpretive study. *Support Care*  
45 *Cancer* 2019;**27**:2771–81.  
46
- 47 46 Skalla KA, Lavoie Smith EM, Li Z, *et al.* Multidimensional needs of caregivers for patients  
48 with cancer. *Clin J Oncol Nurs* 2013;**17**:500–6.  
49
- 50 47 Geuenich K. *Krebs gemeinsam bewältigen - Wie Angehörige durch Achtsamkeit Ressourcen*  
51 *stärken.* Stuttgart: : Schattauer 2014.  
52
- 53 48 Andersson G, Carlbring P, Berger T, *et al.* What makes internet therapy work? *Cogn Behav*  
54 *Ther* 2009;**38**:55–60.  
55
- 56 49 Mohr DC, Cuijpers P, Lehman K. Supportive accountability: A model for providing human  
57 support to enhance adherence to eHealth interventions. *J Med Internet Res* 2011;**13**:1–11.  
58
- 59 50 Baumeister H, Reichler L, Munzinger M, *et al.* The impact of guidance on Internet-based  
60 mental health interventions - A systematic review. *Internet Interv* 2014;**1**:205–15.
- 51 Eckert M, Ebert DD, Lehr D, *et al.* Does SMS-support make a difference? Effectiveness of a  
two-week online-training to overcome procrastination. A randomized controlled trial.

- 1  
2  
3 *Front Psychol* 2018;**9**:1–13.
- 4  
5 52 Viechtbauer W, Smits L, Kotz D, *et al.* A simple formula for the calculation of sample size in  
6 pilot studies. *J Clin Epidemiol* 2015;**68**:1375–9.
- 7  
8 53 Boß L, Lehr D, Reis D, *et al.* Reliability and validity of assessing user satisfaction with web-  
9 based health interventions. *J Med Internet Res* 2016;**18**:e234.
- 10  
11 54 Ladwig I, Rief W, Nestoriuc Y. What Are the Risks and Side Effects of Psychotherapy? –  
12 Development of an Inventory for the Assessment of Negative Effects of Psychotherapy  
13 (INEP). *Verhaltenstherapie* 2014;**24**:252–63.
- 14  
15 55 Schröder J, Sautier L, Kriston L, *et al.* Development of a questionnaire measuring Attitudes  
16 towards Psychological Online Interventions-the APOI. *J Affect Disord* 2015;**187**:136–41.
- 17  
18 56 Mehnert A, Müller D, Lehmann C, *et al.* Die deutsche Version des NCCN Distress-  
19 Thermometers: Empirische Prüfung eines Screening-Instruments zur erfassung  
20 psychosozialer Belastung bei Krebspatienten. *Zeitschrift für Psychiatr Psychol und*  
21 *Psychother* 2006;**54**:213–23.
- 22  
23 57 Roth AJ, Kornblith AB, Batel-Copel L, *et al.* Rapid screening for psychologic distress in men  
24 with prostate carcinoma: A pilot study. *Cancer* 1998;**82**:1904–8.
- 25  
26 58 Kroenke K, Strine TW, Spitzer RL, *et al.* The PHQ-8 as a measure of current depression in  
27 the general population. *J Affect Disord* 2009;**114**:163–73.
- 28  
29 59 Kroenke K, Spitzer RL. The PHQ-9: A New Depression Diagnostic and Severity Measure.  
30 *Psychiatr Ann* 2002;**32**:509–15.
- 31  
32 60 Robert L Spitzer, Kurt Kroenke, Janet B W Williams, *et al.* A Brief Measure for Assessing  
33 Generalized Anxiety Disorder. *Arch Intern Med* 2006;**166**:1092–7.
- 34  
35 61 Löwe B, Decker O, Müller S, *et al.* Validation and standardization of the Generalized  
36 Anxiety Disorder Screener (GAD-7) in the general population. *Med Care* 2008;**46**:266–74.
- 37  
38 62 Iqbal SU, Rogers W, Selim A, *et al.* The Veterans RAND 12 Item Health Survey (VR-12):  
39 What It Is and How It Is Used. *CHQOERs VA Med Center CAPP Bost Univ Sch Public Heal*  
40 *Bedford* 2007;:1–12.
- 41  
42 63 Kazis LE, Miller DR, Clark JA, *et al.* Improving Response Choices on the Veterans SF-36  
43 Health Survey Role Functioning Scales. *J Ambul Care Manag* 2004;**27**:263–80.
- 44  
45 64 Selim AJ, Rogers W, Fleishman JA, *et al.* Updated U.S. population standard for the Veterans  
46 RAND 12-item Health Survey (VR-12). *Qual Life Res* 2009;**18**:43–52.
- 47  
48 65 Graessel E, Berth H, Lichte T, *et al.* Subjective caregiver burden: Validity of the 10-item  
49 short version of the Burden Scale for Family Caregivers BSFC-s. *BMC Geriatr* 2014;**14**:1–9.
- 50  
51 66 Pendergrass A, Malnis C, Graf U, *et al.* Screening for caregivers at risk: Extended validation  
52 of the short version of the Burden Scale for Family Caregivers (BSFC-s) with a valid  
53 classification system for caregivers caring for an older person at home. *BMC Health Serv*  
54 *Res* 2018;**18**:1–9.
- 55  
56 67 Zimmermann T, Herschbach P, Wessarges M, *et al.* Fear of Progression in Partners of  
57 Chronically Ill Patients. *Behav Med* 2011;**37**:37–41.
- 58  
59 68 Kendel F, Spaderna H, Sieverding M, *et al.* Eine deutsche Adaptation des ENRICH Social  
60 Support Inventory ( ESSI ). *Diagnostica* 2011;**57**:99–106.
- 69 Cordes A, Herrmann-Lingen C, Büchner B, *et al.* Repräsentative Normierung des  
ENRICH-Social-Support-Instrument (ESSI) - Deutsche Version. *Klin Diagnostik und Eval*

- 2009;**1**:16–32.
- 70 Dalgard OS, Dowrick C, Lehtinen V, *et al.* Negative life events , social support and gender difference in depression. *Soc Psychiatry Psychiatr Epidemiol* 2006;**41**:444–51.
- 71 Kocalevent RD, Berg L, Beutel ME, *et al.* Social support in the general population: Standardization of the Oslo social support scale (OSSS-3). *BMC Psychol* 2018;**6**:4–11.
- 72 Vasileiou K, Barnett J, Barreto M, *et al.* Experiences of loneliness associated with being an informal caregiver: A qualitative investigation. *Front Psychol* 2017;**8**:585.
- 73 Jerusalem M, Schwarzer R. *Skalen zur Erfassung von Lehrer- und Schülermerkmalen. Dokumentation der psychometrischen Verfahren im Rahmen der Wissenschaftlichen Begleitung des Modellversuchs Selbstwirksame Schulen.* Berlin: : Freie Universität Berlin 1999.
- 74 Luszczynska A, Scholz U, Schwarzer R. The Gernerall Self-Efficacy Scale: Multicultural Validation Studies. *J Psychol* 2005;**139**:439–57.
- 75 Mystakidou K, Parpa E, Panagiotou I, *et al.* Caregivers' anxiety and self-efficacy in palliative care. *Eur J Cancer Care (Engl)* 2013;**22**:188–95.
- 76 Scholz U, Gutierrez-Dona B, Sud S, *et al.* Is General Self-Efficacy a Universal Construct ? Psychometric Findings from 25 Countries. *Eur J Psychol Assess* 2002;**18**:242–51.
- 77 Charles S. Carver. You Want to Measure Coping But Your Protocol's Too Long: Consider the Brief COPE. *Int J Behav Med* 1997;**4**:92–100.
- 78 Knoll N, Rieckmann N, Schwarzer R. Coping as a mediator between personality and stress outcomes: A longitudinal study with cataract surgery patients. *Eur J Pers* 2005;**19**:229–47.
- 79 Lipsey MW, Wilson DB. The efficacy of psychological educational, and behavioral treatment: Confirmation from meta-analysis. *Am Psychol* 1993;**48**:1181–209.
- 80 Melville KM, Casey LM, Kavanagh DJ. Dropout from internet-based treatment for psychological disorders. *Br J Clin Psychol* 2010;**49**:455–71.
- 81 Tang WPY, Chan CWH, So WKW, *et al.* Web-based interventions for caregivers of cancer patients : A review of literatures. *Asia-Pacific Journal Oncol Nurs* 2014;**1**:9–15.
- 82 Fry JP, Neff RA. Periodic prompts and reminders in health promotion and health behavior interventions: Systematic review. *J Med Internet Res* 2009;**11**:1–15.
- 83 Furukawa TA, Noma H, Caldwell DM, *et al.* Waiting list may be a nocebo condition in psychotherapy trials: A contribution from network meta-analysis. *Acta Psychiatr Scand* 2014;**130**:181–92.
- 84 Lambert SD, Ould Brahim L, Morrison M, *et al.* Priorities for caregiver research in cancer care: an international Delphi survey of caregivers, clinicians, managers, and researchers. *Support Care Cancer* 2019;**27**:805–17.

Figure 1 Flow diagram of the study procedure

See separate File "PartnerCARE\_Figure 1 Flow diagram.pdf"

1  
2  
3  
4  
5  
6  
7  
8  
9  
10  
11  
12  
13  
14  
15  
16  
17  
18  
19  
20  
21  
22  
23  
24  
25  
26  
27  
28  
29  
30  
31  
32  
33  
34  
35  
36  
37  
38  
39  
40  
41  
42  
43  
44  
45  
46  
47  
48  
49  
50  
51  
52  
53  
54  
55  
56  
57  
58  
59  
60

For peer review only

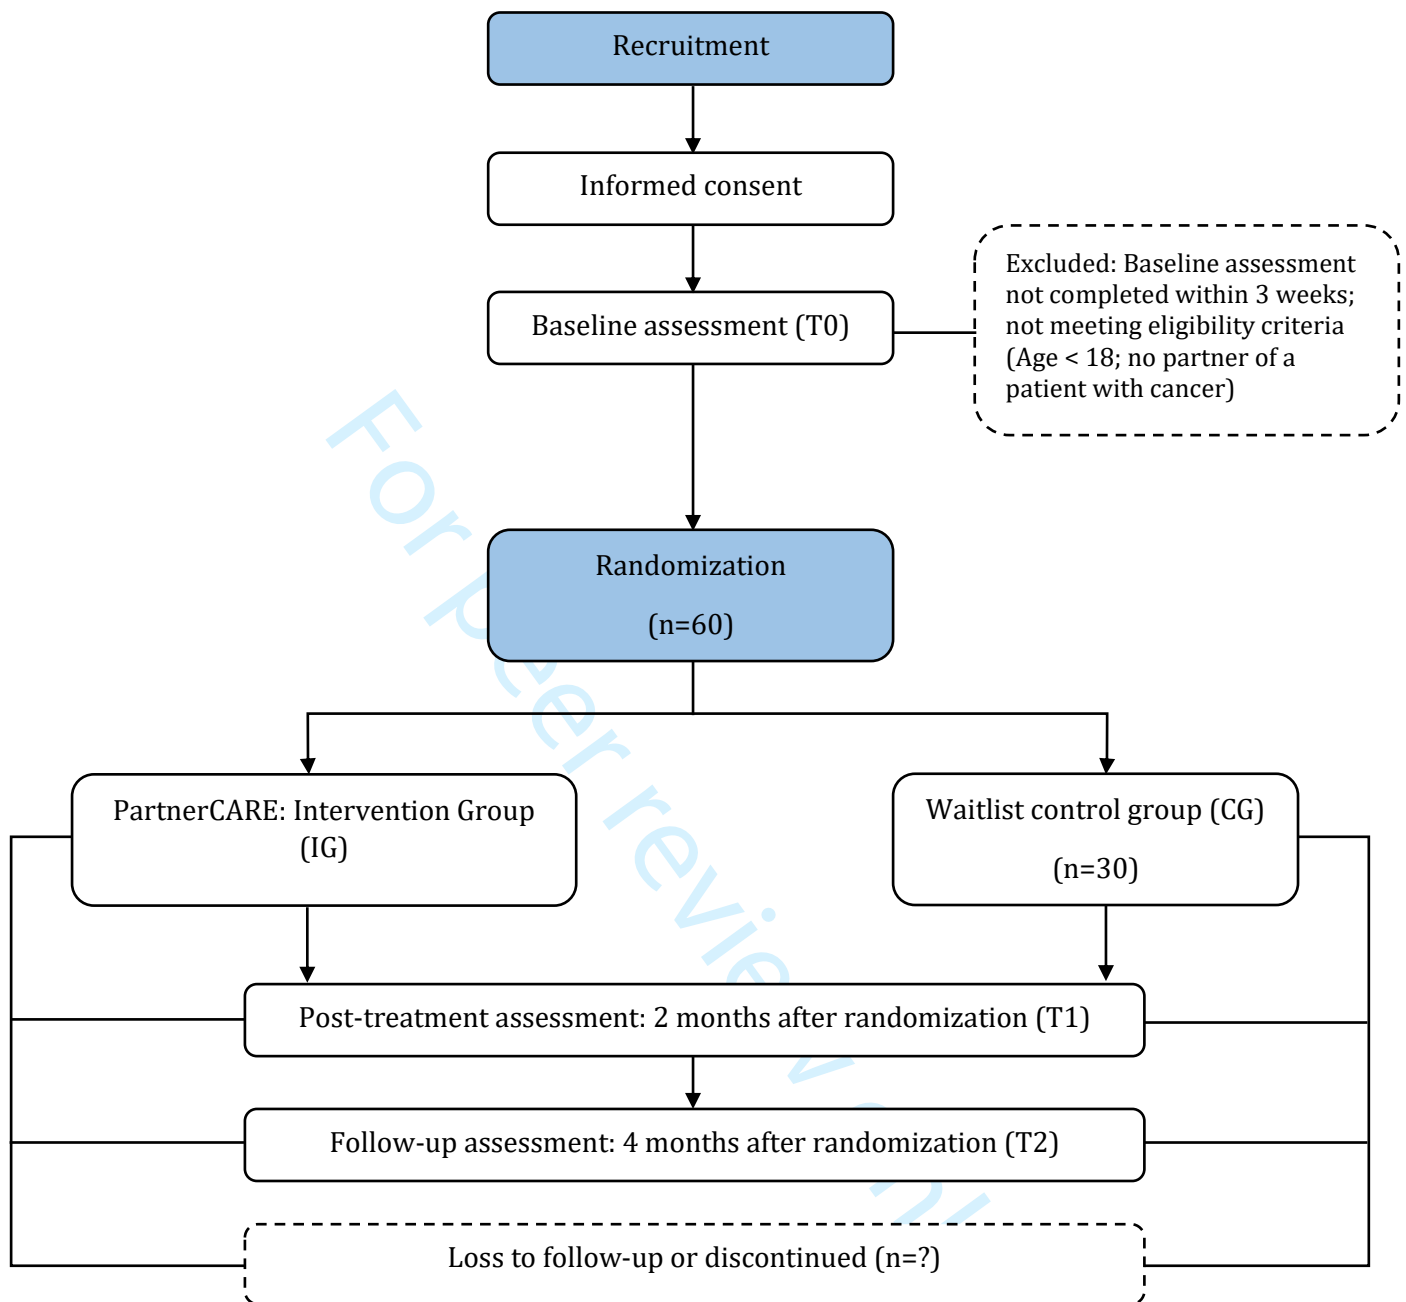

Figure 1 Flow diagram of the study procedure



SPIRIT 2013 Checklist: Recommended items to address in a clinical trial protocol and related documents\*

| Section/item                      | Item No | Description                                                                                                                                                                                                                                                                              | Addressed on page number |
|-----------------------------------|---------|------------------------------------------------------------------------------------------------------------------------------------------------------------------------------------------------------------------------------------------------------------------------------------------|--------------------------|
| <b>Administrative information</b> |         |                                                                                                                                                                                                                                                                                          |                          |
| Title                             | 1       | Descriptive title identifying the study design, population, interventions, and, if applicable, trial acronym                                                                                                                                                                             | 1                        |
| Trial registration                | 2a      | Trial identifier and registry name. If not yet registered, name of intended registry                                                                                                                                                                                                     | 2, 22                    |
|                                   | 2b      | All items from the World Health Organization Trial Registration Data Set                                                                                                                                                                                                                 | 2                        |
| Protocol version                  | 3       | Date and version identifier                                                                                                                                                                                                                                                              | 1                        |
| Funding                           | 4       | Sources and types of financial, material, and other support                                                                                                                                                                                                                              | 22                       |
| Roles and responsibilities        | 5a      | Names, affiliations, and roles of protocol contributors                                                                                                                                                                                                                                  | 1                        |
|                                   | 5b      | Name and contact information for the trial sponsor                                                                                                                                                                                                                                       | -                        |
|                                   | 5c      | Role of study sponsor and funders, if any, in study design; collection, management, analysis, and interpretation of data; writing of the report; and the decision to submit the report for publication, including whether they will have ultimate authority over any of these activities | 22-23                    |
|                                   | 5d      | Composition, roles, and responsibilities of the coordinating centre, steering committee, endpoint adjudication committee, data management team, and other individuals or groups overseeing the trial, if applicable (see Item 21a for data monitoring committee)                         | -                        |

|    |                                                           |     |                                                                                                               |             |
|----|-----------------------------------------------------------|-----|---------------------------------------------------------------------------------------------------------------|-------------|
| 1  | <b>Introduction</b>                                       |     |                                                                                                               |             |
| 2  |                                                           |     |                                                                                                               |             |
| 3  | Background and                                            | 6a  | Description of research question and justification for undertaking the trial, including summary of relevant   | 4-5         |
| 4  | rationale                                                 |     | studies (published and unpublished) examining benefits and harms for each intervention                        |             |
| 5  |                                                           |     |                                                                                                               |             |
| 6  |                                                           | 6b  | Explanation for choice of comparators                                                                         | 13          |
| 7  |                                                           |     |                                                                                                               |             |
| 8  | Objectives                                                | 7   | Specific objectives or hypotheses                                                                             | 5           |
| 9  |                                                           |     |                                                                                                               |             |
| 10 | Trial design                                              | 8   | Description of trial design including type of trial (eg, parallel group, crossover, factorial, single group), |             |
| 11 |                                                           |     | allocation ratio, and framework (eg, superiority, equivalence, noninferiority, exploratory)                   | 5-6         |
| 12 |                                                           |     |                                                                                                               |             |
| 13 |                                                           |     |                                                                                                               |             |
| 14 | <b>Methods: Participants, interventions, and outcomes</b> |     |                                                                                                               |             |
| 15 |                                                           |     |                                                                                                               |             |
| 16 | Study setting                                             | 9   | Description of study settings (eg, community clinic, academic hospital) and list of countries where data will | 6           |
| 17 |                                                           |     | be collected. Reference to where list of study sites can be obtained                                          |             |
| 18 |                                                           |     |                                                                                                               |             |
| 19 | Eligibility criteria                                      | 10  | Inclusion and exclusion criteria for participants. If applicable, eligibility criteria for study centres and  | 6           |
| 20 |                                                           |     | individuals who will perform the interventions (eg, surgeons, psychotherapists)                               |             |
| 21 |                                                           |     |                                                                                                               |             |
| 22 | Interventions                                             | 11a | Interventions for each group with sufficient detail to allow replication, including how and when they will be | 7-12        |
| 23 |                                                           |     | administered                                                                                                  |             |
| 24 |                                                           |     |                                                                                                               |             |
| 25 |                                                           | 11b | Criteria for discontinuing or modifying allocated interventions for a given trial participant (eg, drug dose  | -           |
| 26 |                                                           |     | change in response to harms, participant request, or improving/worsening disease)                             |             |
| 27 |                                                           |     |                                                                                                               |             |
| 28 |                                                           | 11c | Strategies to improve adherence to intervention protocols, and any procedures for monitoring adherence        | 7-9         |
| 29 |                                                           |     | (eg, drug tablet return, laboratory tests)                                                                    |             |
| 30 |                                                           |     |                                                                                                               |             |
| 31 |                                                           | 11d | Relevant concomitant care and interventions that are permitted or prohibited during the trial                 | -           |
| 32 |                                                           |     |                                                                                                               |             |
| 33 | Outcomes                                                  | 12  | Primary, secondary, and other outcomes, including the specific measurement variable (eg, systolic blood       | 13-18       |
| 34 |                                                           |     | pressure), analysis metric (eg, change from baseline, final value, time to event), method of aggregation      |             |
| 35 |                                                           |     | (eg, median, proportion), and time point for each outcome. Explanation of the clinical relevance of chosen    |             |
| 36 |                                                           |     | efficacy and harm outcomes is strongly recommended                                                            |             |
| 37 |                                                           |     |                                                                                                               |             |
| 38 | Participant timeline                                      | 13  | Time schedule of enrolment, interventions (including any run-ins and washouts), assessments, and visits       | 7, Fig. 1   |
| 39 |                                                           |     | for participants. A schematic diagram is highly recommended (see Figure)                                      | (Flowchart) |
| 40 |                                                           |     |                                                                                                               |             |
| 41 |                                                           |     |                                                                                                               |             |
| 42 |                                                           |     |                                                                                                               |             |
| 43 |                                                           |     |                                                                                                               |             |
| 44 |                                                           |     |                                                                                                               |             |
| 45 |                                                           |     |                                                                                                               |             |
| 46 |                                                           |     |                                                                                                               |             |



|   |             |    |                                                                                                                                                                                       |    |
|---|-------------|----|---------------------------------------------------------------------------------------------------------------------------------------------------------------------------------------|----|
| 1 | Sample size | 14 | Estimated number of participants needed to achieve study objectives and how it was determined, including clinical and statistical assumptions supporting any sample size calculations | 13 |
| 2 |             |    |                                                                                                                                                                                       |    |
| 3 |             |    |                                                                                                                                                                                       |    |
| 4 | Recruitment | 15 | Strategies for achieving adequate participant enrolment to reach target sample size                                                                                                   | 6  |
| 5 |             |    |                                                                                                                                                                                       |    |

## 6 **Methods: Assignment of interventions (for controlled trials)**

### 7 Allocation:

|    |                    |     |                                                                                                                                                                                                                                                                                                                                                          |     |
|----|--------------------|-----|----------------------------------------------------------------------------------------------------------------------------------------------------------------------------------------------------------------------------------------------------------------------------------------------------------------------------------------------------------|-----|
| 8  |                    |     |                                                                                                                                                                                                                                                                                                                                                          |     |
| 9  |                    |     |                                                                                                                                                                                                                                                                                                                                                          |     |
| 10 | Sequence           | 16a | Method of generating the allocation sequence (eg, computer-generated random numbers), and list of any factors for stratification. To reduce predictability of a random sequence, details of any planned restriction (eg, blocking) should be provided in a separate document that is unavailable to those who enrol participants or assign interventions | 7   |
| 11 | generation         |     |                                                                                                                                                                                                                                                                                                                                                          |     |
| 12 |                    |     |                                                                                                                                                                                                                                                                                                                                                          |     |
| 13 |                    |     |                                                                                                                                                                                                                                                                                                                                                          |     |
| 14 |                    |     |                                                                                                                                                                                                                                                                                                                                                          |     |
| 15 |                    |     |                                                                                                                                                                                                                                                                                                                                                          |     |
| 16 | Allocation         | 16b | Mechanism of implementing the allocation sequence (eg, central telephone; sequentially numbered, opaque, sealed envelopes), describing any steps to conceal the sequence until interventions are assigned                                                                                                                                                | 6-7 |
| 17 | concealment        |     |                                                                                                                                                                                                                                                                                                                                                          |     |
| 18 | mechanism          |     |                                                                                                                                                                                                                                                                                                                                                          |     |
| 19 |                    |     |                                                                                                                                                                                                                                                                                                                                                          |     |
| 20 | Implementation     | 16c | Who will generate the allocation sequence, who will enrol participants, and who will assign participants to interventions                                                                                                                                                                                                                                | 7   |
| 21 |                    |     |                                                                                                                                                                                                                                                                                                                                                          |     |
| 22 |                    |     |                                                                                                                                                                                                                                                                                                                                                          |     |
| 23 |                    |     |                                                                                                                                                                                                                                                                                                                                                          |     |
| 24 | Blinding (masking) | 17a | Who will be blinded after assignment to interventions (eg, trial participants, care providers, outcome assessors, data analysts), and how                                                                                                                                                                                                                | -   |
| 25 |                    |     |                                                                                                                                                                                                                                                                                                                                                          |     |
| 26 |                    |     |                                                                                                                                                                                                                                                                                                                                                          |     |
| 27 |                    | 17b | If blinded, circumstances under which unblinding is permissible, and procedure for revealing a participant's allocated intervention during the trial                                                                                                                                                                                                     | -   |
| 28 |                    |     |                                                                                                                                                                                                                                                                                                                                                          |     |
| 29 |                    |     |                                                                                                                                                                                                                                                                                                                                                          |     |
| 30 |                    |     |                                                                                                                                                                                                                                                                                                                                                          |     |

## 31 **Methods: Data collection, management, and analysis**

|    |                 |     |                                                                                                                                                                                                                                                                                                                                                                                                              |        |
|----|-----------------|-----|--------------------------------------------------------------------------------------------------------------------------------------------------------------------------------------------------------------------------------------------------------------------------------------------------------------------------------------------------------------------------------------------------------------|--------|
| 32 |                 |     |                                                                                                                                                                                                                                                                                                                                                                                                              |        |
| 33 | Data collection | 18a | Plans for assessment and collection of outcome, baseline, and other trial data, including any related processes to promote data quality (eg, duplicate measurements, training of assessors) and a description of study instruments (eg, questionnaires, laboratory tests) along with their reliability and validity, if known. Reference to where data collection forms can be found, if not in the protocol | 13-18  |
| 34 | methods         |     |                                                                                                                                                                                                                                                                                                                                                                                                              |        |
| 35 |                 |     |                                                                                                                                                                                                                                                                                                                                                                                                              |        |
| 36 |                 |     |                                                                                                                                                                                                                                                                                                                                                                                                              |        |
| 37 |                 |     |                                                                                                                                                                                                                                                                                                                                                                                                              |        |
| 38 |                 | 18b | Plans to promote participant retention and complete follow-up, including list of any outcome data to be collected for participants who discontinue or deviate from intervention protocols                                                                                                                                                                                                                    | 13, 15 |
| 39 |                 |     |                                                                                                                                                                                                                                                                                                                                                                                                              |        |
| 40 |                 |     |                                                                                                                                                                                                                                                                                                                                                                                                              |        |
| 41 |                 |     |                                                                                                                                                                                                                                                                                                                                                                                                              |        |
| 42 |                 |     |                                                                                                                                                                                                                                                                                                                                                                                                              |        |

|    |                                 |     |                                                                                                                                                                                                                                                                                                                                       |           |
|----|---------------------------------|-----|---------------------------------------------------------------------------------------------------------------------------------------------------------------------------------------------------------------------------------------------------------------------------------------------------------------------------------------|-----------|
| 1  | Data management                 | 19  | Plans for data entry, coding, security, and storage, including any related processes to promote data quality (eg, double data entry; range checks for data values). Reference to where details of data management procedures can be found, if not in the protocol                                                                     | 6, 13, 22 |
| 2  |                                 |     |                                                                                                                                                                                                                                                                                                                                       |           |
| 3  |                                 |     |                                                                                                                                                                                                                                                                                                                                       |           |
| 4  |                                 |     |                                                                                                                                                                                                                                                                                                                                       |           |
| 5  | Statistical methods             | 20a | Statistical methods for analysing primary and secondary outcomes. Reference to where other details of the statistical analysis plan can be found, if not in the protocol                                                                                                                                                              | 18-19     |
| 6  |                                 |     |                                                                                                                                                                                                                                                                                                                                       |           |
| 7  |                                 |     |                                                                                                                                                                                                                                                                                                                                       |           |
| 8  |                                 | 20b | Methods for any additional analyses (eg, subgroup and adjusted analyses)                                                                                                                                                                                                                                                              | -         |
| 9  |                                 |     |                                                                                                                                                                                                                                                                                                                                       |           |
| 10 |                                 | 20c | Definition of analysis population relating to protocol non-adherence (eg, as randomised analysis), and any statistical methods to handle missing data (eg, multiple imputation)                                                                                                                                                       | 18-19     |
| 11 |                                 |     |                                                                                                                                                                                                                                                                                                                                       |           |
| 12 |                                 |     |                                                                                                                                                                                                                                                                                                                                       |           |
| 13 |                                 |     |                                                                                                                                                                                                                                                                                                                                       |           |
| 14 | <b>Methods: Monitoring</b>      |     |                                                                                                                                                                                                                                                                                                                                       |           |
| 15 |                                 |     |                                                                                                                                                                                                                                                                                                                                       |           |
| 16 | Data monitoring                 | 21a | Composition of data monitoring committee (DMC); summary of its role and reporting structure; statement of whether it is independent from the sponsor and competing interests; and reference to where further details about its charter can be found, if not in the protocol. Alternatively, an explanation of why a DMC is not needed | -         |
| 17 |                                 |     |                                                                                                                                                                                                                                                                                                                                       |           |
| 18 |                                 |     |                                                                                                                                                                                                                                                                                                                                       |           |
| 19 |                                 |     |                                                                                                                                                                                                                                                                                                                                       |           |
| 20 |                                 |     |                                                                                                                                                                                                                                                                                                                                       |           |
| 21 |                                 |     |                                                                                                                                                                                                                                                                                                                                       |           |
| 22 |                                 | 21b | Description of any interim analyses and stopping guidelines, including who will have access to these interim results and make the final decision to terminate the trial                                                                                                                                                               | -         |
| 23 |                                 |     |                                                                                                                                                                                                                                                                                                                                       |           |
| 24 |                                 |     |                                                                                                                                                                                                                                                                                                                                       |           |
| 25 | Harms                           | 22  | Plans for collecting, assessing, reporting, and managing solicited and spontaneously reported adverse events and other unintended effects of trial interventions or trial conduct                                                                                                                                                     | 14        |
| 26 |                                 |     |                                                                                                                                                                                                                                                                                                                                       |           |
| 27 |                                 |     |                                                                                                                                                                                                                                                                                                                                       |           |
| 28 | Auditing                        | 23  | Frequency and procedures for auditing trial conduct, if any, and whether the process will be independent from investigators and the sponsor                                                                                                                                                                                           | -         |
| 29 |                                 |     |                                                                                                                                                                                                                                                                                                                                       |           |
| 30 |                                 |     |                                                                                                                                                                                                                                                                                                                                       |           |
| 31 |                                 |     |                                                                                                                                                                                                                                                                                                                                       |           |
| 32 | <b>Ethics and dissemination</b> |     |                                                                                                                                                                                                                                                                                                                                       |           |
| 33 |                                 |     |                                                                                                                                                                                                                                                                                                                                       |           |
| 34 | Research ethics approval        | 24  | Plans for seeking research ethics committee/institutional review board (REC/IRB) approval                                                                                                                                                                                                                                             | 22        |
| 35 |                                 |     |                                                                                                                                                                                                                                                                                                                                       |           |
| 36 |                                 |     |                                                                                                                                                                                                                                                                                                                                       |           |
| 37 | Protocol amendments             | 25  | Plans for communicating important protocol modifications (eg, changes to eligibility criteria, outcomes, analyses) to relevant parties (eg, investigators, REC/IRBs, trial participants, trial registries, journals, regulators)                                                                                                      | 22        |
| 38 |                                 |     |                                                                                                                                                                                                                                                                                                                                       |           |
| 39 |                                 |     |                                                                                                                                                                                                                                                                                                                                       |           |
| 40 |                                 |     |                                                                                                                                                                                                                                                                                                                                       |           |
| 41 |                                 |     |                                                                                                                                                                                                                                                                                                                                       |           |
| 42 |                                 |     |                                                                                                                                                                                                                                                                                                                                       |           |

|    |                               |     |                                                                                                                                                                                                                                                                                     |          |
|----|-------------------------------|-----|-------------------------------------------------------------------------------------------------------------------------------------------------------------------------------------------------------------------------------------------------------------------------------------|----------|
| 1  | Consent or assent             | 26a | Who will obtain informed consent or assent from potential trial participants or authorised surrogates, and how (see Item 32)                                                                                                                                                        | 6, 22    |
| 2  |                               |     |                                                                                                                                                                                                                                                                                     |          |
| 3  |                               |     |                                                                                                                                                                                                                                                                                     |          |
| 4  |                               | 26b | Additional consent provisions for collection and use of participant data and biological specimens in ancillary studies, if applicable                                                                                                                                               | -        |
| 5  |                               |     |                                                                                                                                                                                                                                                                                     |          |
| 6  |                               |     |                                                                                                                                                                                                                                                                                     |          |
| 7  | Confidentiality               | 27  | How personal information about potential and enrolled participants will be collected, shared, and maintained in order to protect confidentiality before, during, and after the trial                                                                                                | 6, 13,22 |
| 8  |                               |     |                                                                                                                                                                                                                                                                                     |          |
| 9  |                               |     |                                                                                                                                                                                                                                                                                     |          |
| 10 | Declaration of interests      | 28  | Financial and other competing interests for principal investigators for the overall trial and each study site                                                                                                                                                                       | 22-23    |
| 11 |                               |     |                                                                                                                                                                                                                                                                                     |          |
| 12 |                               |     |                                                                                                                                                                                                                                                                                     |          |
| 13 | Access to data                | 29  | Statement of who will have access to the final trial dataset, and disclosure of contractual agreements that limit such access for investigators                                                                                                                                     | 22       |
| 14 |                               |     |                                                                                                                                                                                                                                                                                     |          |
| 15 |                               |     |                                                                                                                                                                                                                                                                                     |          |
| 16 | Ancillary and post-trial care | 30  | Provisions, if any, for ancillary and post-trial care, and for compensation to those who suffer harm from trial participation                                                                                                                                                       | -        |
| 17 |                               |     |                                                                                                                                                                                                                                                                                     |          |
| 18 |                               |     |                                                                                                                                                                                                                                                                                     |          |
| 19 |                               |     |                                                                                                                                                                                                                                                                                     |          |
| 20 | Dissemination policy          | 31a | Plans for investigators and sponsor to communicate trial results to participants, healthcare professionals, the public, and other relevant groups (eg, via publication, reporting in results databases, or other data sharing arrangements), including any publication restrictions | 2        |
| 21 |                               |     |                                                                                                                                                                                                                                                                                     |          |
| 22 |                               |     |                                                                                                                                                                                                                                                                                     |          |
| 23 |                               |     |                                                                                                                                                                                                                                                                                     |          |
| 24 |                               | 31b | Authorship eligibility guidelines and any intended use of professional writers                                                                                                                                                                                                      | -        |
| 25 |                               |     |                                                                                                                                                                                                                                                                                     |          |
| 26 |                               | 31c | Plans, if any, for granting public access to the full protocol, participant-level dataset, and statistical code                                                                                                                                                                     | -        |
| 27 |                               |     |                                                                                                                                                                                                                                                                                     |          |
| 28 |                               |     |                                                                                                                                                                                                                                                                                     |          |
| 29 | <b>Appendices</b>             |     |                                                                                                                                                                                                                                                                                     |          |
| 30 |                               |     |                                                                                                                                                                                                                                                                                     |          |
| 31 | Informed consent materials    | 32  | Model consent form and other related documentation given to participants and authorised surrogates                                                                                                                                                                                  | -        |
| 32 |                               |     |                                                                                                                                                                                                                                                                                     |          |
| 33 |                               |     |                                                                                                                                                                                                                                                                                     |          |
| 34 | Biological specimens          | 33  | Plans for collection, laboratory evaluation, and storage of biological specimens for genetic or molecular analysis in the current trial and for future use in ancillary studies, if applicable                                                                                      | -        |
| 35 |                               |     |                                                                                                                                                                                                                                                                                     |          |
| 36 |                               |     |                                                                                                                                                                                                                                                                                     |          |

\*It is strongly recommended that this checklist be read in conjunction with the SPIRIT 2013 Explanation & Elaboration for important clarification on the items. Amendments to the protocol should be tracked and dated. The SPIRIT checklist is copyrighted by the SPIRIT Group under the Creative Commons [“Attribution-NonCommercial-NoDerivs 3.0 Unported”](https://creativecommons.org/licenses/by-nc-nd/3.0/) license.

# BMJ Open

## PartnerCARE – a psycho-oncological online intervention for partners of patients with cancer: Study protocol for a randomized controlled feasibility trial

|                                 |                                                                                                                                                                                                                                                                                                                                                                                                                                                                                                                                                                                                                                                                                                                                                                                       |
|---------------------------------|---------------------------------------------------------------------------------------------------------------------------------------------------------------------------------------------------------------------------------------------------------------------------------------------------------------------------------------------------------------------------------------------------------------------------------------------------------------------------------------------------------------------------------------------------------------------------------------------------------------------------------------------------------------------------------------------------------------------------------------------------------------------------------------|
| Journal:                        | <i>BMJ Open</i>                                                                                                                                                                                                                                                                                                                                                                                                                                                                                                                                                                                                                                                                                                                                                                       |
| Manuscript ID                   | bmjopen-2019-035599.R2                                                                                                                                                                                                                                                                                                                                                                                                                                                                                                                                                                                                                                                                                                                                                                |
| Article Type:                   | Protocol                                                                                                                                                                                                                                                                                                                                                                                                                                                                                                                                                                                                                                                                                                                                                                              |
| Date Submitted by the Author:   | 28-Jul-2020                                                                                                                                                                                                                                                                                                                                                                                                                                                                                                                                                                                                                                                                                                                                                                           |
| Complete List of Authors:       | Bodschwinna, Daniela; University Ulm Medical Centre, Department of Psychosomatic Medicine and Psychotherapy; Comprehensive Cancer Center Ulm (CCCU)<br>Lorenz, Inga; University Ulm Medical Centre, Department of Psychosomatic Medicine and Psychotherapy<br>Bauereiss, Natalie; Ulm University, Institut of Psychology and Education, Department of Clinical Psychology and Psychotherapy<br>Gündel, Harald; University Ulm Medical Centre, Department of Psychosomatic Medicine and Psychotherapy<br>Baumeister, Harald; Ulm University, Institut of Psychology and Education, Department of Clinical Psychology and Psychotherapy<br>Hoenig, Klaus; University Ulm Medical Centre, Department of Psychosomatic Medicine and Psychotherapy; Comprehensive Cancer Center Ulm (CCCU) |
| <b>Primary Subject Heading</b>: | Mental health                                                                                                                                                                                                                                                                                                                                                                                                                                                                                                                                                                                                                                                                                                                                                                         |
| Secondary Subject Heading:      | Oncology                                                                                                                                                                                                                                                                                                                                                                                                                                                                                                                                                                                                                                                                                                                                                                              |
| Keywords:                       | MENTAL HEALTH, ONCOLOGY, Adult oncology < ONCOLOGY                                                                                                                                                                                                                                                                                                                                                                                                                                                                                                                                                                                                                                                                                                                                    |
|                                 |                                                                                                                                                                                                                                                                                                                                                                                                                                                                                                                                                                                                                                                                                                                                                                                       |

SCHOLARONE™  
Manuscripts



I, the Submitting Author has the right to grant and does grant on behalf of all authors of the Work (as defined in the below author licence), an exclusive licence and/or a non-exclusive licence for contributions from authors who are: i) UK Crown employees; ii) where BMJ has agreed a CC-BY licence shall apply, and/or iii) in accordance with the terms applicable for US Federal Government officers or employees acting as part of their official duties; on a worldwide, perpetual, irrevocable, royalty-free basis to BMJ Publishing Group Ltd ("BMJ") its licensees and where the relevant Journal is co-owned by BMJ to the co-owners of the Journal, to publish the Work in this journal and any other BMJ products and to exploit all rights, as set out in our [licence](#).

The Submitting Author accepts and understands that any supply made under these terms is made by BMJ to the Submitting Author unless you are acting as an employee on behalf of your employer or a postgraduate student of an affiliated institution which is paying any applicable article publishing charge ("APC") for Open Access articles. Where the Submitting Author wishes to make the Work available on an Open Access basis (and intends to pay the relevant APC), the terms of reuse of such Open Access shall be governed by a Creative Commons licence – details of these licences and which [Creative Commons](#) licence will apply to this Work are set out in our licence referred to above.

Other than as permitted in any relevant BMJ Author's Self Archiving Policies, I confirm this Work has not been accepted for publication elsewhere, is not being considered for publication elsewhere and does not duplicate material already published. I confirm all authors consent to publication of this Work and authorise the granting of this licence.

1  
2  
3 **PartnerCARE – a psycho-oncological online intervention for**  
4 **partners of patients with cancer: Study protocol for a**  
5 **randomized controlled feasibility trial**  
6  
7  
8  
9

10 Daniela Bodschwinna<sup>1,2\*</sup>, Inga Lorenz<sup>1</sup>, Natalie Bauereiss<sup>3</sup>, Harald Gündel<sup>1</sup>, Harald Baumeister<sup>3</sup>,  
11 Klaus Hoenig<sup>1,2</sup>  
12  
13

14 <sup>1</sup> Department of Psychosomatic Medicine and Psychotherapy, University Medical Center Ulm, Germany  
15

16 <sup>2</sup> Comprehensive Cancer Center Ulm (CCCU), Germany  
17

18 <sup>3</sup> Department of Clinical Psychology and Psychotherapy, Institute of Psychology and Education, University  
19 of Ulm, Germany  
20  
21  
22  
23  
24  
25  
26  
27  
28  
29  
30  
31  
32  
33  
34  
35  
36  
37

38 \*Corresponding author  
39

40 **Address for Correspondence:**  
41

42 Daniela Bodschwinna  
43

44 Department of Psychosomatic Medicine and Psychotherapy, University Medical Center Ulm  
45

46 Albert-Einstein-Allee 23  
47

48 89081 Ulm, Germany  
49

50 Phone: +49 731/5032815, e-mail: [daniela.bodschwinna@uni-ulm.de](mailto:daniela.bodschwinna@uni-ulm.de)  
51  
52  
53  
54

55 Protocol version 3 – 28/07/2020  
56

57 Word count: 6114  
58  
59  
60

## Abstract

**Introduction:** Cancer burdens not only the patient, but also the partner to a comparable extent. Partners of patients with cancer are highly involved in the caring process and therefore often experience distress and report a low quality of life. Interventions for supporting partners are scarce. Existing ones are rarely used by partners because they are often time consuming *per se* and offer only limited flexibility with regard to schedule and location. The online intervention PartnerCARE has been developed on basis of caregiver needs and consists of six consecutive sessions and four optional sessions, which are all guided by an e-coach. The study aims to evaluate feasibility and acceptance of the online intervention PartnerCARE and the related trial process. In addition, first insights of the putative efficacy of PartnerCARE should be gained.

**Methods and analysis:** A two arm parallel group randomized controlled trial (RCT) will be conducted to compare the PartnerCARE online intervention with a waitlist control group. The study aims to recruit in total n=60 partners of patients with any type of cancer across different access paths (e.g. university medical centres, support groups, social media). Congruent with feasibility study objectives, the primary outcome comprises recruitment process, study procedure, acceptance and satisfaction with the intervention (CSQ-I), possible negative effects (INEP) and drop-out rates. Secondary outcomes include quality of life, distress, depression, anxiety, caregiver burden, fear of progression, social support, self-efficacy, coping and loneliness. Online measurements will be performed by self-assessment at three time points (baseline/pre-randomization, 2 months and 4 months after randomization). Data analyses will be based on intention-to-treat principle.

**Ethics and dissemination:** Ethics approval has been granted by the Ethics Committee of the University of Ulm (No. 390/18). Results from this study will be disseminated to relevant healthcare communities, in peer-reviewed journals and at scientific and clinical conferences.

**Keywords:** cancer, caregiver, partner, spouse, distress, quality of life, caregiver burden, e-health

**Trial Registration number:** DRKS00017019. Registered on 08 April 2019.



### Strengths and limitations of this study

- Randomized controlled feasibility trial of a novel online intervention specifically tailored to the care needs of partners of patients with cancer
- The PartnerCARE online intervention comprises evidence-based psychological support including psychoeducational, cognitive behavioural, and guided imagery components
- Low-threshold intervention for partners with low utilization of psychosocial services due to time and logistic limitations, low self-awareness of own care needs as well as gender-related concerns (e.g. male partners)
- Possible adverse effects of the intervention will be monitored
- Challenges of the trial comprise the diverse target group (regarding e.g. age, diagnosis of the patient, progress of the disease) and technical comprehension of the participants

## Introduction

Family members, particularly partners, are increasingly involved in the care of individuals with cancer [1]. They support the patient in daily life (e.g. they manage treatment appointments, take over additional tasks in the household, manage medication, and provide emotional support) and are often not aware of their own needs [2,3]. The disease and the corresponding challenging situation can lead to a great impact on the partner's well-being and health. Partners are at high risk to suffer from various types of problems including social and emotional problems [4]. Hence, caregivers of cancer patients reported significant more impairments than non-caregivers regarding work productivity, activity and quality of life [5]. Whereas the physical quality of life of partners is similar to a norm population, their reported mental quality of life is significantly lower [6]. Compared to non-caregivers, caregivers show a significantly higher occurrence of stress-related comorbidities like depression (OR=1.50), anxiety (OR=1.97) or insomnia (OR=2.01) [5], and compared to patients they show a similar prevalence of depression (RR=1.01) and anxiety (RR=.71) [7,8]. Concurrently, caregivers' burden often stays invisible, due to the fact that the health care system focuses on the patient which leaves partners' supportive care needs often neglected or under-reported [9]. Male partners as caregivers are a particularly under-recognized and under-supported group [10].

Several psychosocial interventions have been designed to address the needs of cancer caregiver. The interventions differ regarding aim (e.g. reduce caregiver burden, improve quality of life), underlying approaches (e.g. psychoeducation, cognitive-behavioural therapy, existential therapy), delivering format (e.g. face-to-face, online, telephone and group therapy, dyadic, individual) and addressed participants (e.g. couple, caregiver alone). Systematic reviews have shown that these interventions have small to medium positive effects on multiple outcomes for caregivers [11–13]. Interventions exclusively relying on cognitive behavioural therapy had only negligible effects on caregivers [14]. Especially in couple interventions the effects for caregivers have to be considered critically, because numerous interventions focus on patient care and include caregivers only as support resources [11]. In general, intervention studies often lack of reporting how to implement the interventions into practice [15]. There are two main challenges about interventions for caregivers: First, the target group is difficult to reach, which is evident from low recruitment rates [12,16]. Second, the existing face-to-face interventions are rarely used by caregivers (e.g. they are too time-consuming, caregivers are unaware of own needs) [17,18]. As a result, online interventions have moved into focus over the last decade. They have broadly been perceived as suitable, acceptable and helpful for cancer caregivers [16,17,19]. Online interventions have several advantages over other treatment delivering formats: online interventions are easily and quickly accessible as well as flexible regarding time and location

1  
2  
3 independency, and they allow for caregivers privacy while seeking for information and support  
4 [20,21]. Furthermore nearly a half of the caring partners are interested in using online  
5 interventions and would prefer an intervention that takes less than 1 hour per week, lasts  
6 minimum five weeks, is addressed to the partner only and contains information as well as peer  
7 support [22,23].  
8  
9  
10

11 In the context of the German National Cancer Plan the Federal Ministry of Health requests  
12 appropriate psycho-oncological care for all patients and caregivers in need [24,25] irrespective of  
13 inpatient or outpatient treatment. A recent report on the psycho-oncological care in Germany  
14 recommends to develop and promote innovative offers like e-health programs [26]. Despite the  
15 structures and recommendations a lot of patients and caregivers receive no or no promptly and  
16 no low-threshold psycho-oncological care in Germany [27].  
17  
18  
19  
20  
21

22 Already developed or planned online interventions for caregivers address couples [28,29],  
23 informal caregivers in general (including partners, children, parents) [30,31] or male caregivers  
24 and caregivers of patients with a specific type of cancer [32,33], while only one hitherto known  
25 intervention particularly addresses partners [34]. None of them is available in German. The  
26 results from online interventions for caregivers are rare, because to date most of them did only  
27 publish study protocols [33,34] or promising trend results from feasibility studies [28–32].  
28  
29  
30  
31

## 32 **Aim**

33  
34 The present study has two aims. First, we want to evaluate the feasibility of the online intervention  
35 PartnerCARE and the extent of participants' satisfaction with the intervention. Second, the  
36 potential efficacy of PartnerCARE on the partner's well-being will be investigated compared to the  
37 waitlist control group post treatment and over 4-month follow-up. The results of this feasibility  
38 study will be used to optimize PartnerCARE via participant feedback. Subsequently a  
39 comprehensive efficacy evaluation of the online intervention is planned.  
40  
41  
42  
43  
44  
45  
46  
47

## 48 **Methods**

### 49 **Study design**

50  
51 This is a two arm, parallel randomized controlled trial comparing the online intervention  
52 PartnerCARE (intervention group, IG) with a waitlist control group (CG). Participants of the  
53 intervention group will receive the guided version (with individual feedback from an e-coach) of  
54 PartnerCARE. The control group will receive no intervention during the study. After a waiting  
55 period of 4 months participants of the control group will get the opportunity to work on the  
56 unguided version (with automatic feedback) of PartnerCARE. Assessments of the primary and  
57  
58  
59  
60

1  
2  
3 secondary outcomes will take place at baseline (T0), 2 months after randomization (post-  
4 treatment, T1) and 4 months after randomization (follow-up, T2).  
5

6  
7 This clinical trial has been approved by the ethics committee of Ulm University (No. 390/18) and  
8 will be conducted and reported in accordance with the Consolidated Standards of Reporting Trials  
9 (CONSORT) Statement for pilot RCTs [35] as well as the guidelines for executing and reporting  
10 internet intervention research [36]. The study protocol is reported according to the SPIRIT  
11 (Standard Protocol Items: Recommendations for Interventional Trials) 2013 Statement [37]. This  
12 study is registered in the German clinical trial register under [DRKS00017019](https://www.drks.org/DRKS00017019).  
13  
14  
15  
16

### 17 **Inclusion and exclusion criteria**

18  
19 The primary inclusion criterion for participation is to be in a relationship with a partner who is  
20 diagnosed with any type of cancer (initial diagnosis or relapse, regardless of the onset of the  
21 disease or stage of the patient's treatment). Participants are required (1) to be age 18 or above,  
22 (2) have an internet access and an appropriate device, (3) provide the study team an e-mail  
23 address for contact reasons and (4) sign an informed consent. Participants do not have to live with  
24 the patient, but participants will be excluded if the partner with cancer has died before the start  
25 of the study. Inclusion and exclusion criteria will be checked at the first online assessment (T0)  
26 via self-report.  
27  
28  
29  
30  
31  
32

### 33 **Recruitment**

34  
35 To overcome the challenge of recruiting cancer caregivers, recruitment take place in a multiplicity  
36 of online and offline fields in the complete German-speaking area (includes Germany, Austria and  
37 Switzerland). Participants are recruited in relevant social media groups (e.g. groups for caregivers  
38 of patients with cancer), in online communities, via flyers and circular emails in university medical  
39 centres, links on clinic homepages, online and offline support groups, cancer counselling centres  
40 and comprehensive cancer centres (CCCs). All recruitment routes lead to the PartnerCARE study  
41 homepage ([www.esano.klips-ulm.de/de/trainings/krebserkrankung/partnercare/](http://www.esano.klips-ulm.de/de/trainings/krebserkrankung/partnercare/)), where  
42 potential participants get information and can register for the study via contact form or sending  
43 an e-mail to the study team. Recruitment started in April 2019 and is still ongoing until the target  
44 sample size will be reached. Due to further project plans and financial reasons recruitment will be  
45 closed after 18 months, even if the target sample size could not be reached.  
46  
47  
48  
49  
50  
51  
52  
53

### 54 **Study Procedure**

55  
56 After initial contact via study homepage or e-mail interested partners will receive an e-mail from  
57 the study team including a PDF with detailed participation information and an informed consent  
58 form attached. After given informed consent (via e-mail, fax or mail), participants will get an  
59 invitation to the online baseline assessment (T0) and will be randomized afterwards either to the  
60

1  
2  
3 intervention group (immediately access to the guided version of PartnerCARE) or to the waitlist  
4 control group (access to the unguided version of PartnerCARE after about 4 months according to  
5 the follow-up assessment). Participants will be informed via e-mail about group affiliation. 2  
6 months and 4 months after randomization all participants will receive an invitation for post-  
7 treatment and follow-up assessment (Figure 1).  
8  
9

10  
11  
12 \*\*\* Please insert figure 1 about here\*\*\*  
13

## 14 **Randomization**

15  
16 Randomization and allocation of participants to two groups will be conducted by an independent  
17 researcher, who is not involved in other processes of the study, using an automated online  
18 randomization program ([www.sealedenvelope.com](http://www.sealedenvelope.com)). Permuted block randomization with  
19 randomly arranged block sizes (2 and 4) with an allocation ratio of 1:1 (allocation to intervention  
20 and waitlist control condition will be equally distributed in each block) will be performed. This  
21 results in a preferably balanced group distribution and that the data collector is not able to  
22 forecast the allocation of participant.  
23  
24  
25  
26  
27

## 28 **Intervention**

### 29 *Development of the intervention*

30  
31  
32 The development of PartnerCARE was inspired by a therapy manual for a structured group  
33 intervention about psychoeducation with cancer patients [38] and internet intervention  
34 standards established by the research group [e.g. 39]. Thus, the intervention is based on various  
35 concepts which are widely used in cancer context: psychoeducation, behavioural therapy,  
36 supportive therapy and guided imagery [12]. The group intervention was adapted to an  
37 individually online format and to the specific needs of caregivers. A literature search was  
38 conducted, focusing on current reviews, qualitative and quantitative research about needs of  
39 cancer caregivers. An overview of caregiver needs is listed in Table 1. The most relevant topics  
40 out of the caregiver needs are included into the PartnerCARE intervention and some topics that  
41 may only be relevant to some are provided as optional additional sessions (e.g. sexuality, death  
42 and dying). As PartnerCARE is an offer to partners of patients with any kind of cancer, we  
43 abstained from putting detailed information about specific cancer disease and treatment into the  
44 intervention to avoid an overload of the single sessions. Instead a list of relevant websites with  
45 further information and help services is provided in the 6<sup>th</sup> session.  
46  
47  
48  
49  
50  
51  
52  
53  
54

55  
56 In order to ensure participant motivation several persuasive elements were integrated in the  
57 design of PartnerCARE [40–42]. The reduction principle is used by providing a weekly activity  
58 plan where participants record small activities for each day to learn in small and simple steps to  
59 improve self-care. At the beginning of each session the experience with the activities are queried  
60

(rehearsal principle). The tunneling principle is implemented by guiding the participants through the intervention with feedback after each session from the e-coach. Reminders are sent if the weekly session is exceeded 2 days. Three exemplary partners are specifically developed regarding the similarity and social learning principle by telling their story, giving exemplary answers on exercises and accompany the participants through the sessions. These exemplary partners are introducing themselves in the first session via picture and written text. In all following sessions participants can click on the picture of the exemplary partners and read their exemplary answers to various exercises. The exemplary partners are provided to show participants that they are not alone with their burdens. The online intervention is offered through Minddistrict ([www.minddistrict.com](http://www.minddistrict.com)), an e-health platform where a secure access to the online intervention and a secure exchange between participant and e-coach is granted. The internet platform and the intervention are available 24 hours a day and 7 days a week.

The first version of PartnerCARE (main sessions) was evaluated by 4 independent psycho oncologists (three psychologists, one psychiatrist) who were not involved in the development process. Each psycho oncologist valued one session via the think aloud method [43]: while they were working on the session they were encouraged to vocalize what they are thinking at the moment. Participant comments were collected on a list and used to further develop PartnerCARE regarding user friendliness (e.g. insert of progress bars on each page), text formulations (e.g. incomprehensible and too psychological phrases verbalized more generally understandable) and content adjustments (e.g. connections to previous sessions). The overall development process lasted from January 2018 until February 2019.

Table 1 Overview of needs of cancer caregivers

| Needs of caregivers                 | Literature                                                                                          |
|-------------------------------------|-----------------------------------------------------------------------------------------------------|
| Information                         | about illness and treatment,<br>how to provide care                                                 |
| Comprehensive cancer care           | contact with healthcare professionals,<br>knowledge of available services like e.g.<br>peer support |
| Emotional and psychological support | sleep disturbances, depression, anxiety,<br>fatigue, weight gain                                    |
| Impact in daily life                | financial, uncertainty, looking after own<br>health, balance own needs with needs of<br>patient     |
| Relationship                        | communication, sexuality                                                                            |
| Spirituality                        |                                                                                                     |

### *Content of the intervention*

The content of the online intervention PartnerCARE (Table 2) is composed of different empirically evaluated and clinically established manuals [e.g 38,47]. In the intervention we combined content of different reliable approaches, which are shown to be effective for caregivers [e.g.12]: psycho-education, cognitive behavioural therapy, supportive therapy and guided imagery elements. Therefore, the intervention focuses on activating resources, positive activities, communication skills, improving self-care and self-help strategies to manage caregiver burdens. In addition to psychoeducative text the intervention contains visual and audio materials to enhance understanding and readability as well as to increase adherence and efficacy [48]. Practical exercises and the three exemplary partners make the intervention interactive. The guided imagery exercises facilitate awareness of inner-soul processes and they are used for relaxation. To create a transfer of the learned content and strategies into daily life, examples and exercises for home practice between the sessions are contained. PartnerCARE consists of one introduction session (overview of the intervention, introduction in technical handling of the intervention), six main consecutive sessions, four optional additional sessions with specific content and one booster session. The optional sessions are presented at the third main session and can be selected by the participant. Duration of each session varies from 30 to 60 minutes, but there is no time limit. Participants work on their own and can take breaks within a session whenever and how often they want. It is recommended to work on one session each week to have enough time between the sessions for practicing. Therefore, at the end of each session participants are asked to set an appointment for working on the next session.

To have a clear structure over the whole intervention, every session follows the same process:

1. Today's feeling: rating on a burden thermometer from 0 ("no burden") to 10 ("high burden") and describing the current feeling
2. Report of home practice from the last week
3. Basic information: psychoeducation about the topic of the session
4. Practical exercises: During the session or for practice between the sessions
5. Preview of the main topic from the next session
6. Guided imagery exercise: guided audio imagination of approximately 10 minutes with different topics



Table 2 Structure and content of the PartnerCARE sessions

| Sessions                      | Content                                                                                                                                                                                                                                       | Example exercise                                                                                                                                                                                                                |
|-------------------------------|-----------------------------------------------------------------------------------------------------------------------------------------------------------------------------------------------------------------------------------------------|---------------------------------------------------------------------------------------------------------------------------------------------------------------------------------------------------------------------------------|
| Introduction                  | <ul style="list-style-type: none"> <li>- technical issues and functions</li> <li>- overview of the training</li> </ul>                                                                                                                        | <i>Aim:</i> train the ability to use the online intervention                                                                                                                                                                    |
| <b>Main sessions</b>          |                                                                                                                                                                                                                                               |                                                                                                                                                                                                                                 |
| 1. Specific burdens           | <ul style="list-style-type: none"> <li>- specific burdens (e.g. from partners</li> <li>- identification of own resources (e.g.</li> <li>- plan for positive activities</li> </ul>                                                             | We ask the partner to write down their story and how they cope with it. <i>Aim:</i> awareness of burden and perception of how to deal with the burden using existing resources                                                  |
| 2. Inner drivers              | <ul style="list-style-type: none"> <li>- identification, interpretation and meaning of personal drivers (e.g. 'be perfect', 'please others') and their possible impact in caregiver context</li> <li>- giving yourself permissions</li> </ul> | Partners identify their inner drivers via questionnaire and are asked to phrase self-permissions. <i>Aim:</i> recognizing and down-scaling of excessive expectations on the own person to facilitate daily life                 |
| 3. Partnership communication  | <ul style="list-style-type: none"> <li>- basic rules of successful communication (non-verbal, gender differences)</li> <li>- communication in the context of disease</li> </ul>                                                               | Partners are asked to write down their communication problems. Afterwards they should plan a conversation with implementing the learned communication rules. <i>Aim:</i> improve open communication between partner and patient |
| 4. Handling negative feelings | <ul style="list-style-type: none"> <li>- focus on anxiety</li> <li>- mindfulness as strategy to deal with anxiety</li> </ul>                                                                                                                  | Partners are encouraged to try different mindfulness exercises. <i>Aim:</i> reduction of dysfunctional coping and regain of control                                                                                             |

|                                                                                           |                                     |                                                                                                              |                                                                                                                                                                                                                                                   |
|-------------------------------------------------------------------------------------------|-------------------------------------|--------------------------------------------------------------------------------------------------------------|---------------------------------------------------------------------------------------------------------------------------------------------------------------------------------------------------------------------------------------------------|
| 1<br>2<br>3<br>4<br>5<br>6<br>7<br>8<br>9<br>10<br>11<br>12<br>13<br>14<br>15<br>16<br>17 | 5. Control and acceptance           | - discrimination between things which are controllable or should be accepted<br>- enjoyment in everyday life | Partners are asked which actuality they want to accept because it's not controllable. Furthermore, they learn how to enjoy little things. <i>Aim:</i> awareness of dysfunctional control and awareness of little positive things in everyday life |
| 18<br>19<br>20<br>21<br>22<br>23<br>24<br>25                                              | 6. Paths and goals                  | - further support offers<br>- reflection of the training<br>- outlook: next steps / goals                    | We ask the partner what was helpful and what they want to continue. <i>Aim:</i> motivation of the partner to be his own trainer                                                                                                                   |
| 26<br>27<br>28<br>29<br>30<br>31<br>32<br>33<br>34<br>35                                  | Booster session                     | - repetition of two basis elements of the training: activity plan and open communication                     | Partners are asked how they have fared in the past two weeks and which exercises they continued. <i>Aim:</i> reminder and consolidation of training content                                                                                       |
| 36                                                                                        | <b>Optional additional sessions</b> |                                                                                                              |                                                                                                                                                                                                                                                   |
| 37<br>38<br>39<br>40<br>41<br>42<br>43<br>44<br>45<br>46                                  | Support of own children             | - burdens of children<br>- suggestions for a conversation about the disease/situation                        | Partners are asked to write down their experience with their children and they get conversation examples. <i>Aim:</i> support with communication with children                                                                                    |
| 47<br>48<br>49<br>50<br>51                                                                | Healthy sleep                       | - rules for healthy sleep<br>- sleeping problems<br>- relaxation exercises                                   | Quiz about healthy sleep and sleeping problems. <i>Aim:</i> support with sleep problems                                                                                                                                                           |
| 52<br>53<br>54<br>55<br>56<br>57<br>58<br>59<br>60                                        | Closeness and sexuality             | - open communication about sexuality<br>- relaxation/massage exercises                                       | Partners learn about other types of sexuality e.g. relaxation and closeness through massage exercises. <i>Aim:</i> removal of taboos regarding communication                                                                                      |

|                     |                                                         |                                                                                                                                                                                                                                 |
|---------------------|---------------------------------------------------------|---------------------------------------------------------------------------------------------------------------------------------------------------------------------------------------------------------------------------------|
|                     |                                                         | about sexuality and encouragement to try something new                                                                                                                                                                          |
| Existential burdens | - thinking about end of life<br>- hope, farewell, grief | Partners can write about their thoughts about the end of life and they are encouraged to write about the sense of the time together with their spouse. <i>Aim:</i> removal of taboos regarding thinking and talking about death |

### *Online Intervention Process and guidance*

After baseline assessment (T0) participants of the intervention group will get immediately access to PartnerCARE. Therefore, they will receive an e-mail with log in information for the Minddistrict platform. After log in the participant can start directly with the introduction session. At the end of each session the participant clicks on a send button and the e-coach receive a note that a session was finished. Afterwards the e-coach log in to Minddistrict, read the filled in text fields from the participant and write a feedback. The participant also receives a note via e-mail when feedback on a session is available.

The feedbacks from the e-coach will be partly standardized and individualized dependent on entries from the participant, encouraging them to stay motivated working on the intervention. Since it is aimed that e-coaches need about 10 minutes in average for writing a feedback due to time efficiency, the actual feedback time is measured. Participants will receive the feedback within the next two weekdays after completing a session. Participants can also write a personal message to the e-coach via the Minddistrict platform if they have questions or technical problems. The communication between participant and e-coach will be asynchronous. Guidance in online intervention is used to increase efficacy, adherence and decrease dropout [49,50].

### *Text Message Coach*

Participants can choose in session 1 if they want to be supported additionally with two SMS per week during the intervention (at no charge for the participant). SMS will be sent via online platform MessageBird ([www.messagebird.com](http://www.messagebird.com)). The Text Message Coach is thematically matched with the intervention and accompanies each session with two messages and after the main

1  
2  
3 sessions one message per week until the booster session (in total 15 SMS). The text messages  
4 include motivational quotes, mini-tasks and reminder of positive activities or exercises, for  
5 example “Before you go to bed tonight, look back on your day. Remember: What beautiful  
6 moments have you experienced today?”. It has been shown that SMS support may have the effect  
7 to enhance the intervention effect [51].  
8  
9  
10

### 11 *Control condition*

12  
13  
14 Participants of the waitlist control group will receive no intervention during the study phase but  
15 they are free to use other treatment options in standard care. Four months after randomization  
16 and after completing the follow-up questionnaire (T2) they will get access to the unguided version  
17 of PartnerCARE. The intervention is the same as in the intervention group and participants will  
18 have the possibility to choose the Text Message Coach in session 1 as well. But instead of  
19 individualized feedback they will receive a short automatic feedback after each session.  
20  
21  
22  
23

### 24 **Sample size/power calculation**

25  
26 Since with this study the practicality and feasibility of PartnerCARE will be evaluated as the  
27 primary outcome, a formal sample size calculation is not required. A total sample size of n= 60 (30  
28 partners per arm) was chosen as a recommendation for pilot trials [52]. Part of the feasibility  
29 study will be to explore the feasibility of recruitment and rating of the different recruitment  
30 strategies.  
31  
32  
33  
34

### 35 **Assessments**

36  
37 All Assessments will take place at the online survey platform Unipark ([www.unipark.de](http://www.unipark.de)). Table 3  
38 shows all outcomes and time points. Socio demographic variables include age, sex, marital status,  
39 nationality, education, occupational situation and number of children. In addition, clinical  
40 characteristics from the diseased partner will be assessed with single questions: cancer diagnosis,  
41 date of diagnosis, phase of the disease and current medical treatments. Participants will be  
42 reminded via email to complete surveys if they do not respond to invitation email.  
43  
44  
45  
46  
47

### 48 **Primary Outcome**

49  
50 Primary Outcome of this pilot RCT study is the feasibility of the PartnerCARE online intervention.  
51 To characterize the different aspects of feasibility a variety of questionnaires will be used. The  
52 measurement of feasibility will be composed of satisfaction with the online intervention, possible  
53 negative effects, attitudes toward psychological online interventions, evaluation of the SMS-  
54 Coach, individual feedback from participants, processing duration of the sessions (via feedback  
55 from participants), participant flow, drop-out rates, duration of the intervention, effort from the  
56 e-Coaches and technical difficulties.  
57  
58  
59  
60

1  
2  
3 User Satisfaction with web-based health interventions will be measured with the *Client*  
4 *Satisfaction Questionnaire adapted to Internet-based interventions (CSQ-I)* [53]. Eight items are  
5 rated on a four-point Likert-Scale from 1 (“does apply to me”) to 4 (“does totally apply to me”)  
6 which leads to a sum score range from 8 to 32. The scale demonstrated good reliability and  
7 construct validity. The CSQ-I is being only submitted to the IG post treatment and follow up.  
8  
9

10  
11 Possible negative effects of the online intervention will be assessed with an online adapted version  
12 of the *Inventory for the Assessment of Negative Effects in Psychotherapy (INEP)* [54]. The original  
13 21 items were adapted at the online setting by modifying text (“online intervention” instead of  
14 “therapy”) and replacing items about the relationship between participant and therapist with  
15 items about the e-coach. The adjusted inventory consists of 8 items with a 7-step bipolar format  
16 (-3 = “definitely a negative effect”; 0 = “unchanged”; +3 = “definitely a positive effect”) and 14 items  
17 with a 4-step unipolar format (from 0= “strongly disagree” to 3= “fully agree”). Additionally, the  
18 first 17 items record whether any negative effect is attributed on the online intervention or on  
19 other circumstances in life. For the last 5 items there is an open question in what way the  
20 statement applies. The internal consistency for the original INEP was good ( $\alpha=.86$ ). Participants  
21 of the IG will receive the online adapted version of the INEP (INEP-On) post treatment and follow  
22 up. In contrast, participants of the CG will receive an abridged and adjusted INEP version with 14  
23 items (INEP-CG) about the participation in the study and whether any negative effect is attributed  
24 on the participation in the study or on other circumstances in life post treatment and follow- up.  
25 Both questionnaires include the question “Since or during the online intervention/participation  
26 of the study I had suicidal thoughts/intentions for the first time.”. Participants who score with 1  
27 (“agree a little bit”) receive automatically an email with information about available health care  
28 services in case of emergency. They are advised to seek for help if the symptoms increase.  
29 Participants who score 2 or 3 (“agree partly” or “fully agree”) receive likewise the automatically  
30 emergency email and additionally a psychotherapist of the study management call the participant  
31 to clarify if they distance themselves from suicidal ideation.  
32  
33  
34  
35  
36  
37  
38  
39  
40  
41  
42  
43  
44  
45

46 The attitude towards online interventions will be assessed with the *Attitudes towards*  
47 *Psychological Online Interventions Questionnaire (APOI)* [55]. The APOI consists of 16 five-step  
48 items (from 1 =“totally agree” to 5 =“totally disagree”) which can be integrated into four subscales:  
49 Scepticism and Perception of Risks (SCE), Confidence in Effectiveness (CON), Technologization  
50 Threat (TET) and Anonymity Benefits (ABE), with a theoretical range of 4 to 20 for each subscale.  
51 The total sum score ranges from 16 to 80 whereas higher scores imply a positive attitude towards  
52 online interventions. The medians of the scales can be used to classify the scores (56 for the total  
53 sum score, 9 for SCE, 16 for CON, 12 for TET and 12 for ABE). Cronbach’s’ alpha with  $\alpha=.77$  shows  
54 an acceptable to good internal consistency. The APOI is given to all participants at all three  
55 measurement points.  
56  
57  
58  
59  
60

1  
2  
3 The SMS Coach will be evaluated with three items at post treatment from participants of the IG:  
4 “The SMS Coach was helpful.”, “The content of the SMS was pleasant.” and “The SMS Coach was  
5 motivating.”. The items are scored on a five-point scale from 1 (“never”) to 5 (“always”).  
6  
7

8  
9 After each finished PartnerCARE session at the Minddistrict platform the participants will have  
10 the possibility to give individual feedback to the session. First, they can rate the session from 1  
11 (“did not like at all”) to 10 (“did like very much”). One question is about the scope of the session  
12 (“too extensive”, “too short”, “just right”). Then four open questions ask about which exercise was  
13 most helpful, what was positive, what could be improved and how long took it to complete the  
14 session.  
15  
16  
17

18  
19 Participant flow and drop-out rates will be recorded during the study period. Duration of the  
20 intervention for each participant, effort from the e-coach (needed time for written feedback and  
21 quantity of sent reminders) and technical difficulties are collected by the e-coach.  
22  
23

### 24 **Secondary Outcomes**

25  
26 The *NCCN Distress Thermometer (DT)* which has been developed by the National Comprehensive  
27 Cancer Network (NCCN) is a valid and reliable measure of psychological distress [56,57]. It  
28 consists of a single item with a scale from 0 (“no distress”) to 10 (“extreme distress”), illustrated  
29 by a thermometer and a list of 36 potential problems which can cause distress (rationed into five  
30 categories: practical problems, family problems, emotional problems, spiritual/religious concerns  
31 and physical problems; all rated with yes/no). A cut off value of 5 or higher is recommended for a  
32 clinically significant level of distress.  
33  
34  
35  
36  
37

38  
39 The German version of the *Patient Health Questionnaire (PHQ-8)* is a reliable and valid self-report  
40 tool for assessing current depression symptoms [58]. Given that the online intervention is  
41 preventive and does not focus on depression or suicidality, the PHQ-8 will be used instead of the  
42 PHQ-9 to assess depressive symptoms as secondary outcome. In this case the PHQ-8 is an  
43 acceptable alternative to the PHQ-9. The sensitivity, specificity and positive predictive value of the  
44 PHQ-8 is comparable to the PHQ-9 [59]. The questionnaire consisting of eight items asks about  
45 impairments of the last two weeks and the items are scored on a 4-point Likert scale from 0 (“not  
46 at all”) to 3 (“nearly every day”) with a total range from 0 to 24. Higher values indicate increased  
47 severity of symptoms and a cut-off point of  $\geq 10$  is defined for current depression symptoms [58].  
48  
49  
50  
51  
52

53  
54 The *Generalized Anxiety Disorder Questionnaire (GAD-7)* is a valid and efficient tool for assessing  
55 symptoms of a generalized anxiety disorder [60]. The seven items are scored on a 4-point Likert  
56 scale from 0 (“not at all”) to 3 (“nearly every day”), a total score from 0 to 21 is possible. Like for  
57 the PHQ-8 a cut-off point of  $\geq 10$  is recommended to screen for symptoms of a generalized anxiety  
58 disorder. The reported internal consistency in a German sample is Cronbach  $\alpha=.89$  [61].  
59  
60

1  
2  
3 Quality of life will be assessed with the *Veterans RAND 12-Item Health Survey (VR-12)*, an  
4 abbreviated version of the Veterans RAND 36 Items Health Survey (VR-36) which was developed  
5 on the basis of the validated SF-36 (Short form 36 health survey) questionnaire [62,63]. The VR-  
6 12 consists of different scaled questions (3 point-scale, 5 point-scale and 6 point-scale) with  
7 different rating descriptions. The 12 Items can be separated into two scores: Physical and Mental  
8 Health. Standard norms of the summary scores are available for the U.S. population: Mean for  
9 physical health summary M=48.60 (SD=11.1) and for mental health summary M=51.01 (SD=10.0)  
10 [64].

11  
12  
13 The *Short Version of the Burden Scale for Family Caregivers (BSFC-s)* will be used to assess the  
14 amount of burden in caregivers [65,66]. The ten items are rated on a scale from 0 (“strongly  
15 disagree”) to 3 (“strongly agree”). The score can range from 0 to 30, where higher scores indicate  
16 greater caregiver burden. For interpreting the BSFC-s scores a classification system was  
17 developed: 0-4 means “none to low” burden, 5-14 means “moderate” burden and 15-30 means  
18 “severe to very severe” burden [66]. Cronbach’s alpha for the complete scale is with  $\alpha=.92$  very  
19 high [65].

20  
21  
22 Fear of Progression in spouse caregivers will be assessed with the German Version of the *Fear of*  
23 *Progression in Partners of Chronically Ill Patients (FoP-Q-SF/P; German: PA-F-P-KF)* [67]. The 12  
24 items are responded on a five-point Likert Scale from 1 (“not at all”) to 5 (“very much”). The scale  
25 will be evaluated through addition of the items, whereupon higher values shows higher fear of  
26 progression. A cut-off with 34 or higher indicates dysfunctional fear of progression. The internal  
27 consistency of the complete scale is high (Cronbach  $\alpha=.87$ ).

28  
29  
30 The *ENRICHED Social Support Inventory (ESSI)* is a short questionnaire to assess the perceived  
31 emotional social support [68,69]. The five items are measured with a five-point scale (1=“at no  
32 time” to 5=“always”) with a minimum of 5 and a maximum of 25. The internal consistency of the  
33 scale is  $\alpha=.89$ . For the definition lack of social support, the value of 18 was appointed.

34  
35  
36 The received social support will be assessed with the three-item *Oslo social support scale (OSS-3)*  
37 [70]. The questionnaire consists of one question with a four-point scale and two questions with a  
38 five-point scales with different descriptions. The evaluation is based on the sum score of the raw  
39 scores (3 to 14). A score of 3-8 can be interpreted as ‘poor support’, 9-11 as ‘moderate support’  
40 and 12-14 as ‘strong support’ respectively. The internal consistency with  $\alpha=.64$  is acceptable  
41 considering the number of items [71]. While loneliness can be an important challenge for  
42 caregivers [72], we added one question about loneliness to this questionnaire: ‘How lonely do you  
43 feel at the moment?’ with a five-point-scale from 1(“not at all”) to 5 (“very much”).



The German version of the *Generalized Self-Efficacy scale (GSE, German: SWE)* measures the perceived self-efficacy [73]. This one-dimensional scale was primarily developed for students and teachers, but is also used in cancer context [74,75]. The 10 Items had a response range from 1 (“not at all true”) to 4 (“exactly true”). The internal consistency is  $\alpha=.86$  and the validity is confirmed by numerous findings [76].

Coping will be assessed with the German Version of the *BriefCOPE (Brief Coping Orientation to Problems Experienced) Inventory* [77,78]. It consists of 28 items which are rated on a four-point Likert-Scale ranged from 1 (“not at all”) to 4 (“very much”). The questionnaire is divided in 14 subscales, each represented by two items. The internal consistency for the subscales ranges from  $\alpha=.50$  to  $\alpha=.90$ .

Table 3 Overview of the assessments

| Instruments                          | Aim                                                                     | Time of measurement |    |    |
|--------------------------------------|-------------------------------------------------------------------------|---------------------|----|----|
|                                      |                                                                         | T0                  | T1 | T2 |
| <b>Primary Outcome - feasibility</b> |                                                                         |                     |    |    |
| CSQ-I <sup>a</sup>                   | Participant satisfaction                                                |                     | ✓  | ✓  |
| INEP-On/INEP-CG                      | Negative effects online Interventions (IG) /participation in study (CG) |                     | ✓  | ✓  |
| APOI                                 | Attitudes psychological interventions                                   | ✓                   | ✓  | ✓  |
| Dropout rate                         | Participant adherence                                                   |                     | ✓  | ✓  |
| Evaluation SMS-Coach <sup>a</sup>    | SMS-Coach satisfaction                                                  |                     | ✓  |    |
| <b>Secondary Outcome</b>             |                                                                         |                     |    |    |
| DT                                   | Distress                                                                | ✓                   | ✓  | ✓  |
| PHQ-8                                | Depression                                                              | ✓                   | ✓  | ✓  |
| GAD-7                                | Anxiety                                                                 | ✓                   | ✓  | ✓  |
| VR-12                                | Quality of life                                                         | ✓                   | ✓  | ✓  |
| BSFC-s                               | Caregiver burden                                                        | ✓                   | ✓  | ✓  |
| PA-F-P-KF                            | Fear of progression                                                     | ✓                   | ✓  | ✓  |
| ESSI                                 | Perceived emotional social support                                      | ✓                   | ✓  | ✓  |
| OSS-3                                | Received social support                                                 | ✓                   | ✓  | ✓  |

|   |            |                       |   |   |   |
|---|------------|-----------------------|---|---|---|
| 1 |            |                       |   |   |   |
| 2 |            |                       |   |   |   |
| 3 | SWE        | General self-efficacy | ✓ | ✓ | ✓ |
| 4 |            | expectation           |   |   |   |
| 5 |            |                       |   |   |   |
| 6 | Brief COPE | Coping                | ✓ | ✓ | ✓ |
| 7 |            |                       |   |   |   |
| 8 | Loneliness | Feeling lonely        | ✓ | ✓ | ✓ |
| 9 |            |                       |   |   |   |

### Other assessments

|    |                          |                           |   |   |   |
|----|--------------------------|---------------------------|---|---|---|
| 11 | Socio-demographics       | Age, sex, occupation,     | ✓ |   |   |
| 12 |                          | children                  |   |   |   |
| 13 |                          |                           |   |   |   |
| 14 | Clinical characteristics | Diagnosis, onset, disease | ✓ |   |   |
| 15 |                          | phase, current treatment  |   |   |   |
| 16 | patient                  |                           |   |   |   |
| 17 | Psychotherapy            |                           | ✓ | ✓ | ✓ |
| 18 |                          |                           |   |   |   |
| 19 | (yes/no, how long)       |                           |   |   |   |

T0: Baseline, T1: 2 months, T2: 4 months; <sup>a</sup> Recorded in intervention group only

CSQ-I: Client Satisfaction Questionnaire adapted to internet-based interventions, INEP-On/INEP-CG: Inventory of negative effects in psychotherapy – online/-control group, APOI: Attitudes towards Psychological Online Interventions Questionnaire, DT: Distress Thermometer, PHQ-8: Patient Health Questionnaire, GAD-7: Generalized Anxiety Disorder, VR-12: Veterans RAND 12-item Health Survey, BSFC-s: Short version of the Burden Scale for family caregivers, PA-F-P-KF: Fear of progression questionnaire for partners, ESSI: ENRICH-D-Social-Support-Instrument, OSS-3: Oslo social support scale, SWE: general self-efficacy expectation scale, Brief COPE: abbreviated version of the COPE (Coping Orientation to Problems Experienced) Inventory

### Patient and public involvement

Before start of the feasibility trial, psycho oncologists and partners of cancer patients were invited to value the main sessions of PartnerCARE. Since only four psycho oncologists responded to the request, only the feedback from these four psycho oncologists could be included in the development process. As a subsequent step, feedback from participants of the feasibility study will be used to further optimize the online intervention for the following efficacy evaluation study. We intend to disseminate the main results of the feasibility study with a short report at suitable platforms where partners of patients with cancer are reached (e.g. online communities).

### Statistical analysis

Demographic data will be reported using descriptive statistics. A chart of participant flow during the whole study will be plotted. Quantity of drop-out and reasons for drop-out will be displayed. With basic psychometric analyses the scale structure and internal consistency of the used questionnaires will be verified. Chi-square (for categorical variables) and t-tests will be performed to analyse whether randomization lead to comparable groups with no significant differences at baseline. Before starting with the analyses, we will examine if the data is normally distributed, else we will use a non-parametric test. The significance level for all analyses will be  $p \leq .05$ .

1  
2  
3 All statistical analyses will be performed based on the intention-to-treat principle with multiple  
4 imputations to replace missing data. Per-protocol analyses for the considerably completers will  
5 be additionally conducted to investigate the influence of intervention attrition on study results.  
6  
7

8 Qualitative individual feedback from participants via the Minddistrict platform regarding to the  
9 feasibility and acceptance of the online intervention will be summarized. Feasibility  
10 measurements from the online questionnaire will be analysed descriptive (INEP-On; drop-out)  
11 and with t-test (APOI; CSQ-I (only in IG)).  
12  
13  
14

15 To test a potential intervention effect, i.e. an indication for the potential efficacy of PartnerCARE,  
16 continuous outcome parameters at post-treatment (T1) will be analysed using an analyses of  
17 covariance (ANCOVA), controlling for the baseline measurement (T0) and further covariates (e.g.  
18 age, sex). For follow-up (T2) effects a repeated measure analyses of covariance will be conducted  
19 with time as the within-subject factor (baseline vs. post-treatment vs. follow-up) and group as the  
20 between subject-factor (IG vs. CG). In the case of a significant main effect, post hoc tests will be  
21 conducted to analyse between which measurement points the significant differences exist.  
22 Cohen's d will be calculated to report effect sizes (effect sizes smaller than .32 are considered  
23 small, .33-.55 are considered moderate, and those larger than .56 are considered large [79]).  
24  
25  
26  
27  
28  
29  
30  
31  
32

## 33 Discussion

34 Partners of patients with cancer are confronted with a variety of challenges and new, additional  
35 tasks regarding the disease, resulting in a decrease of mental health. These burdens are often  
36 overlooked and psycho-oncological support or specific interventions for partners are rare. The  
37 online intervention PartnerCARE was developed to provide tailored support for partners of  
38 patients with cancer. The main propose of the feasibility study is to evaluate the feasibility and  
39 acceptance of PartnerCARE and of the study process itself through a randomized controlled trial.  
40 Furthermore, we aim at gaining first preliminary evidence for the potential efficacy of the online  
41 intervention which is hoped to pave the way for a comprehensive efficacy evaluation study. An  
42 online intervention is, from our point of view, particularly suitable for partners because of the  
43 flexibility (time and place independency), easy accessibility, possible anonymity and low-  
44 threshold format. We expect that the online intervention facilitates access to psychosocial services  
45 for partners with hitherto low utilization of conventional face-to-face psychosocial care (e.g.  
46 because of logistic and time reasons, discomfort or other objections towards psychosocial services  
47 or gender-related reasons)[17,18]. Although to date there is evidence that the majority of online  
48 intervention users are female [17] and female caregivers are more negatively affected by the  
49 caregiving process [1], male caregivers should not be neglected. We assume that online  
50  
51  
52  
53  
54  
55  
56  
57  
58  
59  
60

1  
2  
3 interventions could suit particularly for male caregivers, because of their tendency to have to be  
4 strong (no public searching for help) and their potential difficulties to express their concerns and  
5 emotions (could be easier for them in an online setting) [10]. There is recent research about an  
6 online intervention especially for male caregivers [33], but definitely more research is needed to  
7 investigate specific needs of male caregivers and how to better reach male participants for online  
8 interventions.  
9  
10  
11  
12

13 Recruitment of partners of patients with cancer can be challenging due to the fact that partners  
14 are often busy and therefore not reached at the clinic, recruitment via patient is not always  
15 effective (information is not passed to the partner) and there are not many typical areas where  
16 partners can be reached. Recruitment rates for caregivers of cancer patients tended to be poor  
17 and varied from 20% to 66% [16]. To overcome the challenges of recruitment we try to use a wide  
18 variety of online and offline recruitment strategies and will evaluate their adequacy.  
19  
20  
21  
22

23 PartnerCARE is the first online interventions for partners of patients with cancer available in  
24 German language. The newly developed online intervention for partners of patients with cancer  
25 is adjusted to the needs of cancer caregivers and takes several persuasive principles into account.  
26 The online intervention uses a variety of different elements (relevant topics, varying exercises,  
27 practical tips, guided imagery exercises) to motivate participants to go on with the intervention.  
28 If the pilot study verifies the feasibility and acceptance of PartnerCARE it is conceivable to  
29 translate PartnerCARE in different languages and evaluate the online intervention in further  
30 studies worldwide.  
31  
32  
33  
34  
35  
36

37 With this pilot study we will initiate a continuous development and evaluation process of the  
38 online intervention PartnerCARE. During the online intervention we assess satisfaction, positive  
39 and negative estimations of the intervention via written feedback. These insights from partners  
40 of persons with cancer will be used to improve and further develop PartnerCARE to an even more  
41 user tailored intervention. We also will assess possible negative effects in our RCT, to evaluate  
42 potential side effects of the online intervention for partners. The measurement of e-coach time for  
43 feedback every week and quantity of sent reminders will give a first insight in the estimation of  
44 costs for the online intervention for implementation in usual health care.  
45  
46  
47  
48  
49  
50

51 A few limitations need to be taken into consideration. As all outcomes will be assessed via self-  
52 report and the contact with participants is only online, there is uncertainty regarding the identity  
53 of the participants. With signed informed consent and control questions with automatic  
54 premature termination at the first online assessment this problem will be reduced. Online  
55 interventions in general and online interventions specifically for caregivers have to face with high  
56 dropout rates (29% to 38%) [80,81]. To reduce a potential adherence problem and to enhance  
57 motivation the participants of the intervention group will be accompanied by an e-coach with  
58  
59  
60

1  
2  
3 feedback and reminders [50,82] and the development of the online design includes persuasive  
4 elements [42]. As participation in the study is only possible with access to internet and some  
5 technical affinity, we designed the online intervention as simple and intuitive as possible and will  
6 offer technical use basics at the introduction session. Furthermore, it has been discussed that  
7 including a waitlist control condition leads to an overestimation of the effect sizes compared to a  
8 no treatment or psychological placebo condition [83]. However, all participants in our study will  
9 be free to use care as usual and they receive a list of other treatment options like cancer  
10 counselling centres if they are interested. Furthermore, we will be able to have a look on possible  
11 long-term effects (4-month follow up), but this leads to a long waiting time for the waitlist control  
12 group. In addition, our online intervention for partners could not cover all relevant topics: A  
13 recent study showed 'home care interventions', 'impact of financial demands on caregiver, 'impact  
14 of health reforms, programs and policies on caregivers' as some of the most important topics for  
15 caregivers [84]. The further development of PartnerCARE should take these insights into account.

16  
17 Regarding the future outlook, PartnerCARE could be included into the health care routine: by the  
18 time a patient becomes diagnosed with cancer, also the partner should be screened for psycho-  
19 social and physical burdens. PartnerCARE can also provide a communicative benefit for health  
20 care professionals with enhanced awareness of caregivers and the opportunity of having a special  
21 offer for partners. If needed, PartnerCARE could be immediately offered as a tool for partners to  
22 work on their burdens regardless of where and when. It can also be used to overcome the waiting  
23 time for partners until a local psycho-oncological treatment is available.

### 24 25 26 27 28 29 30 31 32 33 34 35 36 37 **Ethics and dissemination**

38  
39 This study has been approved by the Ethics Committee of the University of Ulm (No. 390/18).  
40 Results will be published in peer-reviewed journals and presented on local, national, and  
41 international conferences.  
42  
43

### 44 45 46 47 48 49 50 51 52 53 54 55 56 57 58 59 60 **Abbreviations**

ABE: Anonymity Benefits (Subscale of APOI); ANOVA: Analysis of Variance; APOI: Attitudes  
towards Psychological Online Interventions Questionnaire; BriefCOPE: Brief Coping Orientation  
to Problems Experienced Inventory; BSFC-s: Short Version of the Burden Scale for Family  
Caregivers; CCC: Comprehensive Cancer Center; CG: Waitlist control group; CON: Confidence in  
Effectiveness (Subscale of APOI); CONSORT: Consolidated Standards of Reporting Trials; CSQ-I:  
Client Satisfaction Questionnaire adapted to Internet-based interventions; DT: National  
Comprehensive Cancer Network Distress Thermometer; ESSI: ENRICHED Social Support  
Inventory; FoP-Q-SF/P: Fear of Progression in Partners of Chronically ill Patients; GAD-7:  
Generalized Anxiety Disorder Questionnaire; GSE: Generalized Self-Efficacy scale; IG: Intervention

1  
2  
3 group; INEP-On/-CG: Inventory for the Assessment of Negative Effects in Psychotherapy –  
4 Online/-Control group; NCCN: National Comprehensive Cancer Network; OSS-3: Oslo social  
5 support scale; PHQ-8/9: Patient Health Questionnaire; RCT: Randomized controlled trial; SCE:  
6 Scepticism and Perception of Risk (Subscale of APOI); SF-36: Short form 36 health survey  
7 questionnaire; SMS: Short Message Service; SPIRIT: Standard Protocol Items: Recommendations  
8 for Interventional Trials; TAU: Treatment as usual; TET: Technologization Threat (Subscale of  
9 APOI); VR-12: Veterans RAND 12-Item Health Survey; VR-36: Veterans RAND 36 Items Health  
10 Survey  
11  
12  
13  
14  
15

## 16 **Declarations**

### 17 **Ethics approval and consent to participate**

18  
19  
20 This study was approved by the Ethics Committee of the University of Ulm (no. 390/18) and was  
21 registered in the German Clinical Trials Register ([DRKS00017019](https://www.drks00017019.de)) on 08 April 2019. In case of  
22 important protocol modifications, trial registration will be updated. All participants receive  
23 written information about study process, data security and voluntariness of participation. Prior  
24 to the involvement into the study participants have to confirm understanding of the given  
25 information with written consent. Data collection occur pseudonymized by giving every  
26 participant a personal ID and data is stored password protected. Access to study data will only be  
27 given to authorized study members. After data collection all personal information of participants  
28 will be deleted.  
29  
30  
31  
32  
33  
34  
35

### 36 **Consent for publication**

37  
38 Not applicable.  
39  
40

### 41 **Availability of data and materials**

42  
43 All principal investigators will be given full access to the data sets. Data set will be stored on  
44 password-protected servers of Ulm University with restricted access. External researches may get  
45 access to the final trial dataset on request depending on to be specified data security and data  
46 exchange regulation agreements. To ensure confidentiality, data dispersed to any investigator or  
47 researcher will be blinded of any identifying participant information.  
48  
49  
50  
51

### 52 **Competing interests**

53  
54 The authors declare that they have no competing interests.  
55  
56

### 57 **Funding**

58  
59 This work was supported by a grant from the German Cancer Aid to the Comprehensive Cancer  
60 Center Ulm (grant number: 70112209). The German Cancer Aid had no role in study design,

1  
2  
3 decision to publish or preparation of this manuscript. The German Cancer Aid will not be involved  
4 in data collection, analyses, decision to publish or preparation of future papers regarding the  
5 PartnerCARE project.  
6  
7

### 8 **Author contributions**

9  
10 DB, NB, HG, HB and KH contributed to the study design. DB and IL compiled the content of the  
11 intervention sessions. The online design and structure of the intervention was carried out from  
12 DB building on prior online interventions of the department of Clinical Psychology and  
13 Psychotherapy (HB). Intervention development was supervised by NB, HG, HB and KH. DB is  
14 responsible for recruitment and coordination of the study. DB drafted the manuscript. All authors  
15 provided critical revision and approved the final manuscript.  
16  
17  
18  
19

### 20 **Acknowledgements**

21  
22 Authors would like to thank Sabrina Heil for her engagement in enrolling participants and for her  
23 support in study organization. Furthermore, authors thank Daniel Neveling for his support as e-  
24 coach and Miriam Stock for providing the imaginative audio files. Authors also thank Eileen  
25 Bendig for her supporting role in planning the trial process, Ann-Marie Kuechler for her support  
26 at the Minddistrict Platform as well as Robin Kraft and Sebastian Broetzler for creating the  
27 PartnerCARE homepage. Special thanks go to the psycho oncologists who valued the PartnerCARE  
28 sessions and thus support the enhancement of the intervention.  
29  
30  
31  
32  
33  
34  
35  
36  
37  
38  
39  
40  
41  
42  
43  
44  
45  
46  
47  
48  
49  
50  
51  
52  
53  
54  
55  
56  
57  
58  
59  
60



## References

- 1 Li QP, Mak YW, Loke AY. Spouses' experience of caregiving for cancer patients: A literature review. *Int Nurs Rev* 2013;**60**:178–87.
- 2 Popek V, Hönig K. Cancer and family: tasks and stress of relatives. *Nervenarzt* 2015;**86**:266–8.
- 3 Pitceathly C, Maguire P. The psychological impact of cancer on patients' partners and other key relatives: A review. *Eur J Cancer* 2003;**39**:1517–24.
- 4 Stenberg U, Ruland C, Miaskowski C. Review of the literature on the effects of caring for a patient with cancer. *Psychooncology* 2010;**19**:1013–25.
- 5 Goren A, Gilloteau I, Lees M, *et al.* Quantifying the burden of informal caregiving for patients with cancer in Europe. *Support Care Cancer* 2014;**22**:1637–46.
- 6 Bergelt C, Koch U, Petersen C. Quality of life in partners of patients with cancer. *Qual Life Res* 2008;**17**:653–63.
- 7 Mitchell AJ, Ferguson DW, Gill J, *et al.* Depression and anxiety in long-term cancer survivors compared with spouses and healthy controls: A systematic review and meta-analysis. *Lancet Oncol* 2013;**14**:721–32.
- 8 Sklenarova H, Krümpelmann A, Haun MW, *et al.* When do we need to care about the caregiver? Supportive care needs, anxiety, and depression among informal caregivers of patients with cancer and cancer survivors. *Cancer* 2015;**121**:1513–9.
- 9 Rosenberger C, Höcker A, Cartus M, *et al.* Outpatient Psycho-Oncological Care for Family Members and Patients: Access, Psychological Distress and Supportive Care Needs. *PPmP Psychother Psychosom Medizinische Psychol* 2012;**62**:185–94.
- 10 Lopez V, Copp G, Molassiotis A. Male Caregivers of Patients With Breast and Gynecologic Cancer. *Cancer Nurs* 2012;**35**:402–10.
- 11 Northouse L, Katapodi M, Song L, *et al.* Interventions with family caregivers of cancer patients: Meta-Analysis of randomized trials. *CA Cancer J Clin* 2011;**60**:317–39.
- 12 Applebaum AJ, Breitbart W. Care for the cancer caregiver : A systematic review. *Palliat Support Care* 2013;**11**:231–52.
- 13 Kleine A-K, Hallensleben N, Mehnert A, *et al.* Psychological interventions targeting partners of cancer patients: A systematic review. *Crit Rev Oncol Hematol* 2019;**140**:52–66.
- 14 O'Toole MS, Zachariae R, Renna ME, *et al.* Cognitive behavioral therapies for informal caregivers of patients with cancer and cancer survivors: a systematic review and meta-analysis. *Psychooncology* 2017;**26**:428–37.
- 15 Ugalde A, Gaskin CJ, Rankin NM, *et al.* A systematic review of cancer caregiver interventions: Appraising the potential for implementation of evidence into practice. *Psychooncology* 2019;**28**:687–701.
- 16 Heynsbergh N, Heckel L, Botti M, *et al.* Feasibility, useability and acceptability of technology-based interventions for informal cancer carers: A systematic review. *BMC Cancer* 2018;**18**:244.
- 17 Kaltenbaugh J. D, Klem Lou M, Hu L, *et al.* Using Web-Based Interventions to Support Caregivers of Patients With Cancer: A Systematic Review. *Oncol Nurs Forum* 2015;**42**:156–64.
- 18 Sinfield P, Baker R, Ali S, *et al.* The needs of carers of men with prostate cancer and

- 1  
2  
3 barriers and enablers to meeting them: A qualitative study in England. *Eur J Cancer Care*  
4 *(Engl)* 2012;**21**:527–34.
- 5  
6 19 Sin J, Henderson C, Spain D, *et al.* eHealth interventions for family carers of people with  
7 long term illness: A promising approach? *Clin Psychol Rev* 2018;**60**:109–25.
- 8  
9 20 Griffiths F, Lindenmeyer A, Powell J, *et al.* Why are health care interventions delivered  
10 over the internet? A systematic review of the published literature. *J Med Internet Res*  
11 2006;**8**:e10.
- 12  
13 21 Heynsbergh N, Botti M, Heckel L, *et al.* Caring for the person with cancer and the role of  
14 digital technology in supporting carers. *Support Care Cancer* 2019;**27**:2203–9.
- 15  
16 22 Köhle N, Drossaert CHC, Van Uden-Kraan CF, *et al.* Intent to use a web-based  
17 psychological intervention for partners of cancer patients: Associated factors and  
18 preferences. *J Psychosoc Oncol* 2018;**36**:203–21.
- 19  
20 23 Köhle N, Drossaert CH, Oosterik S, *et al.* Needs and Preferences of Partners of Cancer  
21 Patients Regarding a Web-Based Psychological Intervention: A Qualitative Study. *JMIR*  
22 *Cancer* 2015;**1**:e13.
- 23  
24 24 Bundesministerium für Gesundheit. Nationaler Krebsplan: Handlungsfelder, Ziele,  
25 Umsetzungsempfehlungen und Ergebnisse.  
26 2017.[https://www.bundesgesundheitsministerium.de/fileadmin/Dateien/5\\_Publikationen/](https://www.bundesgesundheitsministerium.de/fileadmin/Dateien/5_Publikationen/Praevention/Broschueren/Broschuere_Nationaler_Krebsplan.pdf)  
27 [Praevention/Broschueren/Broschuere\\_Nationaler\\_Krebsplan.pdf](https://www.bundesgesundheitsministerium.de/fileadmin/Dateien/5_Publikationen/Praevention/Broschueren/Broschuere_Nationaler_Krebsplan.pdf) (accessed 5 Jun  
28 2019).
- 29  
30 25 Leitlinienprogramm Onkologie (Deutsche Krebsgesellschaft, Deutsche Krebshilfe,  
31 AWMF): Psychoonkologische Diagnostik, Beratung und Behandlung von erwachsenen  
32 Krebspatienten, Langversion 1.1. 2014.[https://www.leitlinienprogramm-](https://www.leitlinienprogramm-onkologie.de/fileadmin/user_upload/Downloads/Leitlinien/Psychoonkologieleitlinie_1.1/LL_PSO_Langversion_1.1.pdf)  
33 [onkologie.de/fileadmin/user\\_upload/Downloads/Leitlinien/Psychoonkologieleitlinie\\_1.1/](https://www.leitlinienprogramm-onkologie.de/fileadmin/user_upload/Downloads/Leitlinien/Psychoonkologieleitlinie_1.1/LL_PSO_Langversion_1.1.pdf)  
34 [LL\\_PSO\\_Langversion\\_1.1.pdf](https://www.leitlinienprogramm-onkologie.de/fileadmin/user_upload/Downloads/Leitlinien/Psychoonkologieleitlinie_1.1/LL_PSO_Langversion_1.1.pdf) (accessed 5 Jun 2019).
- 35  
36 26 Schulz H, Bleich C, Bokemeyer C, *et al.* Psychoonkologische Versorgung in Deutschland :  
37 Bundesweite Bestandsaufnahme und Analyse.  
38 2018.[https://www.bundesgesundheitsministerium.de/fileadmin/Dateien/5\\_Publikationen/](https://www.bundesgesundheitsministerium.de/fileadmin/Dateien/5_Publikationen/Gesundheit/Berichte/PsoViD_Gutachten_BMG_19_02_14_gender.pdf)  
39 [Gesundheit/Berichte/PsoViD\\_Gutachten\\_BMG\\_19\\_02\\_14\\_gender.pdf](https://www.bundesgesundheitsministerium.de/fileadmin/Dateien/5_Publikationen/Gesundheit/Berichte/PsoViD_Gutachten_BMG_19_02_14_gender.pdf) (accessed 21 Jun  
40 2019).
- 41  
42 27 Mehnert A, Koranyi S. Psychooncological Care: A Challenge. *Dtsch Medizinische*  
43 *Wochenschrift* 2018;**143**:316–23.
- 44  
45 28 Northouse LL, Schafenacker A, Barr KLC, *et al.* A tailored Web-based psychoeducational  
46 intervention for cancer patients and their family caregivers. *Cancer Nurs* 2014;**37**:321–  
47 30.
- 48  
49 29 Song L, Rini C, Deal AM, *et al.* Improving couples' quality of life through a Web-based  
50 prostate cancer education intervention. *Oncol Nurs Forum* 2015;**42**:183–92.
- 51  
52 30 Scott K, Beatty L. Feasibility study of a self-guided cognitive behaviour therapy internet  
53 intervention for cancer carers. *Aust J Prim Health* 2013;**19**:270–4.
- 54  
55 31 Applebaum AJ, Buda KL, Schofield E, *et al.* Exploring the cancer caregiver's journey  
56 through web-based Meaning-Centered Psychotherapy. *Psychooncology* 2018;**27**:847–56.
- 57  
58 32 Duggleby W, Ghosh S, Struthers-Montford K, *et al.* Feasibility Study of an Online  
59 Intervention to Support Male Spouses of Women With Breast Cancer. *Oncol Nurs Forum*  
60 2017;**44**:765–75.
- 33 Levesque J V., Gerges M, Girgis A. The development of an online intervention (Care Assist)

- 1  
2  
3 to support male caregivers of women with breast cancer: A protocol for a mixed methods  
4 study. *BMJ Open* 2018;**8**:7–9.  
5
- 6 34 Köhle N, Drossaert CH, Schreurs KM, *et al.* A web-based self-help intervention for partners  
7 of cancer patients based on Acceptance and Commitment Therapy: a protocol of a  
8 randomized controlled trial. *BMC Public Health* 2015;**15**:303.  
9
- 10 35 Eldridge S, Chan C, Campbell M, *et al.* CONSORT 2010 statement: extension to randomized  
11 pilot and feasibility trials. *Pilot feasibility Stud* 2016;**2**:64–96.  
12
- 13 36 Proudfoot J, Klein B, Barak A, *et al.* Establishing guidelines for executing and reporting  
14 internet intervention research. *Cogn Behav Ther* 2011;**40**:82–97.  
15
- 16 37 Chan A, Tetzlaff JM, Altman DG, *et al.* SPIRIT 2013 Statement : Defining Standard Protocol  
17 Items for Clinical Trials. *Ann Intern Med* 2013;**158**:200–7.  
18
- 19 38 Weis J, Heckl U, Brocai D, *et al.* *Psychoedukation mit Krebspatienten - Therapiemanual für*  
20 *eine strukturierte Gruppenintervention.* Stuttgart: : Schattauer 2006.  
21
- 22 39 Lin J, Paganini S, Sander L, *et al.* An Internet-Based Intervention for Chronic Pain. *Dtsch*  
23 *Aerzteblatt Online* 2017;**114**:681–8.  
24
- 25 40 Oinas-Kukkonen H, Harjumaa M. Persuasive systems design: Key issues, process model,  
26 and system features. *Commun Assoc Inf Syst* 2009;**24**:485–500.  
27
- 28 41 Kelders SM, Kok RN, Ossebaard HC, *et al.* Persuasive system design does matter: A  
29 systematic review of adherence to web-based interventions. *J Med Internet Res*  
30 2012;**14**:e152.  
31
- 32 42 Baumeister H, Kraft R, Baumel A, *et al.* Persuasive e-health design for behavior change. In:  
33 *Digital Phenotyping and Mobile Sensing: New Developments in Psychoinformatics.* Berlin: :  
34 Springer 2019.  
35
- 36 43 Jaspers MWM, Steen T, Bos C Van Den, *et al.* The think aloud method: A guide to user  
37 interface design. *Int J Med Inform* 2004;**73**:781–95.  
38
- 39 44 Lambert SD, Harrison JD, Smith E, *et al.* The unmet needs of partners and caregivers of  
40 adults diagnosed with cancer: a systematic review. *BMJ Support Palliat Care* 2012;**2**:224–  
41 30.  
42
- 43 45 Marcotte J, Tremblay D, Turcotte A, *et al.* Needs-focused interventions for family  
44 caregivers of older adults with cancer: a descriptive interpretive study. *Support Care*  
45 *Cancer* 2019;**27**:2771–81.  
46
- 47 46 Skalla KA, Lavoie Smith EM, Li Z, *et al.* Multidimensional needs of caregivers for patients  
48 with cancer. *Clin J Oncol Nurs* 2013;**17**:500–6.  
49
- 50 47 Geuenich K. *Krebs gemeinsam bewältigen - Wie Angehörige durch Achtsamkeit Ressourcen*  
51 *stärken.* Stuttgart: : Schattauer 2014.  
52
- 53 48 Andersson G, Carlbring P, Berger T, *et al.* What makes internet therapy work? *Cogn Behav*  
54 *Ther* 2009;**38**:55–60.  
55
- 56 49 Mohr DC, Cuijpers P, Lehman K. Supportive accountability: A model for providing human  
57 support to enhance adherence to eHealth interventions. *J Med Internet Res* 2011;**13**:1–11.  
58
- 59 50 Baumeister H, Reichler L, Munzinger M, *et al.* The impact of guidance on Internet-based  
60 mental health interventions - A systematic review. *Internet Interv* 2014;**1**:205–15.
- 51 Eckert M, Ebert DD, Lehr D, *et al.* Does SMS-support make a difference? Effectiveness of a  
two-week online-training to overcome procrastination. A randomized controlled trial.

- 1  
2  
3 *Front Psychol* 2018;**9**:1–13.
- 4  
5 52 Viechtbauer W, Smits L, Kotz D, *et al.* A simple formula for the calculation of sample size in  
6 pilot studies. *J Clin Epidemiol* 2015;**68**:1375–9.
- 7  
8 53 Boß L, Lehr D, Reis D, *et al.* Reliability and validity of assessing user satisfaction with web-  
9 based health interventions. *J Med Internet Res* 2016;**18**:e234.
- 10  
11 54 Ladwig I, Rief W, Nestoriuc Y. What Are the Risks and Side Effects of Psychotherapy? –  
12 Development of an Inventory for the Assessment of Negative Effects of Psychotherapy  
13 (INEP). *Verhaltenstherapie* 2014;**24**:252–63.
- 14  
15 55 Schröder J, Sautier L, Kriston L, *et al.* Development of a questionnaire measuring Attitudes  
16 towards Psychological Online Interventions-the APOI. *J Affect Disord* 2015;**187**:136–41.
- 17  
18 56 Mehnert A, Müller D, Lehmann C, *et al.* Die deutsche Version des NCCN Distress-  
19 Thermometers: Empirische Prüfung eines Screening-Instruments zur erfassung  
20 psychosozialer Belastung bei Krebspatienten. *Zeitschrift für Psychiatr Psychol und*  
21 *Psychother* 2006;**54**:213–23.
- 22  
23 57 Roth AJ, Kornblith AB, Batel-Copel L, *et al.* Rapid screening for psychologic distress in men  
24 with prostate carcinoma: A pilot study. *Cancer* 1998;**82**:1904–8.
- 25  
26 58 Kroenke K, Strine TW, Spitzer RL, *et al.* The PHQ-8 as a measure of current depression in  
27 the general population. *J Affect Disord* 2009;**114**:163–73.
- 28  
29 59 Kroenke K, Spitzer RL. The PHQ-9: A New Depression Diagnostic and Severity Measure.  
30 *Psychiatr Ann* 2002;**32**:509–15.
- 31  
32 60 Robert L Spitzer, Kurt Kroenke, Janet B W Williams, *et al.* A Brief Measure for Assessing  
33 Generalized Anxiety Disorder. *Arch Intern Med* 2006;**166**:1092–7.
- 34  
35 61 Löwe B, Decker O, Müller S, *et al.* Validation and standardization of the Generalized  
36 Anxiety Disorder Screener (GAD-7) in the general population. *Med Care* 2008;**46**:266–74.
- 37  
38 62 Iqbal SU, Rogers W, Selim A, *et al.* The Veterans RAND 12 Item Health Survey (VR-12):  
39 What It Is and How It Is Used. *CHQOERs VA Med Center CAPP Bost Univ Sch Public Heal*  
40 *Bedford* 2007;:1–12.
- 41  
42 63 Kazis LE, Miller DR, Clark JA, *et al.* Improving Response Choices on the Veterans SF-36  
43 Health Survey Role Functioning Scales. *J Ambul Care Manag* 2004;**27**:263–80.
- 44  
45 64 Selim AJ, Rogers W, Fleishman JA, *et al.* Updated U.S. population standard for the Veterans  
46 RAND 12-item Health Survey (VR-12). *Qual Life Res* 2009;**18**:43–52.
- 47  
48 65 Graessel E, Berth H, Lichte T, *et al.* Subjective caregiver burden: Validity of the 10-item  
49 short version of the Burden Scale for Family Caregivers BSFC-s. *BMC Geriatr* 2014;**14**:1–9.
- 50  
51 66 Pendergrass A, Malnis C, Graf U, *et al.* Screening for caregivers at risk: Extended validation  
52 of the short version of the Burden Scale for Family Caregivers (BSFC-s) with a valid  
53 classification system for caregivers caring for an older person at home. *BMC Health Serv*  
54 *Res* 2018;**18**:1–9.
- 55  
56 67 Zimmermann T, Herschbach P, Wessarges M, *et al.* Fear of Progression in Partners of  
57 Chronically Ill Patients. *Behav Med* 2011;**37**:37–41.
- 58  
59 68 Kendel F, Spaderna H, Sieverding M, *et al.* Eine deutsche Adaptation des ENRICHD Social  
60 Support Inventory ( ESSI ). *Diagnostica* 2011;**57**:99–106.
- 69 Cordes A, Herrmann-Lingen C, Büchner B, *et al.* Repräsentative Normierung des  
ENRICHD-Social-Support-Instrument (ESSI) - Deutsche Version. *Klin Diagnostik und Eval*

- 2009;**1**:16–32.
- 70 Dalgard OS, Dowrick C, Lehtinen V, *et al.* Negative life events , social support and gender difference in depression. *Soc Psychiatry Psychiatr Epidemiol* 2006;**41**:444–51.
- 71 Kocalevent RD, Berg L, Beutel ME, *et al.* Social support in the general population: Standardization of the Oslo social support scale (OSSS-3). *BMC Psychol* 2018;**6**:4–11.
- 72 Vasileiou K, Barnett J, Barreto M, *et al.* Experiences of loneliness associated with being an informal caregiver: A qualitative investigation. *Front Psychol* 2017;**8**:585.
- 73 Jerusalem M, Schwarzer R. *Skalen zur Erfassung von Lehrer- und Schülermerkmalen. Dokumentation der psychometrischen Verfahren im Rahmen der Wissenschaftlichen Begleitung des Modellversuchs Selbstwirksame Schulen.* Berlin: : Freie Universität Berlin 1999.
- 74 Luszczynska A, Scholz U, Schwarzer R. The Gernerall Self-Efficacy Scale: Multicultural Validation Studies. *J Psychol* 2005;**139**:439–57.
- 75 Mystakidou K, Parpa E, Panagiotou I, *et al.* Caregivers' anxiety and self-efficacy in palliative care. *Eur J Cancer Care (Engl)* 2013;**22**:188–95.
- 76 Scholz U, Gutierrez-Dona B, Sud S, *et al.* Is General Self-Efficacy a Universal Construct ? Psychometric Findings from 25 Countries. *Eur J Psychol Assess* 2002;**18**:242–51.
- 77 Charles S. Carver. You Want to Measure Coping But Your Protocol's Too Long: Consider the Brief COPE. *Int J Behav Med* 1997;**4**:92–100.
- 78 Knoll N, Rieckmann N, Schwarzer R. Coping as a mediator between personality and stress outcomes: A longitudinal study with cataract surgery patients. *Eur J Pers* 2005;**19**:229–47.
- 79 Lipsey MW, Wilson DB. The efficacy of psychological educational, and behavioral treatment: Confirmation from meta-analysis. *Am Psychol* 1993;**48**:1181–209.
- 80 Melville KM, Casey LM, Kavanagh DJ. Dropout from internet-based treatment for psychological disorders. *Br J Clin Psychol* 2010;**49**:455–71.
- 81 Tang WPY, Chan CWH, So WKW, *et al.* Web-based interventions for caregivers of cancer patients : A review of literatures. *Asia-Pacific Journal Oncol Nurs* 2014;**1**:9–15.
- 82 Fry JP, Neff RA. Periodic prompts and reminders in health promotion and health behavior interventions: Systematic review. *J Med Internet Res* 2009;**11**:1–15.
- 83 Furukawa TA, Noma H, Caldwell DM, *et al.* Waiting list may be a nocebo condition in psychotherapy trials: A contribution from network meta-analysis. *Acta Psychiatr Scand* 2014;**130**:181–92.
- 84 Lambert SD, Ould Brahim L, Morrison M, *et al.* Priorities for caregiver research in cancer care: an international Delphi survey of caregivers, clinicians, managers, and researchers. *Support Care Cancer* 2019;**27**:805–17.

Figure 1 Flow diagram of the study procedure

See separate File "PartnerCARE\_Figure 1 Flow diagram.pdf"



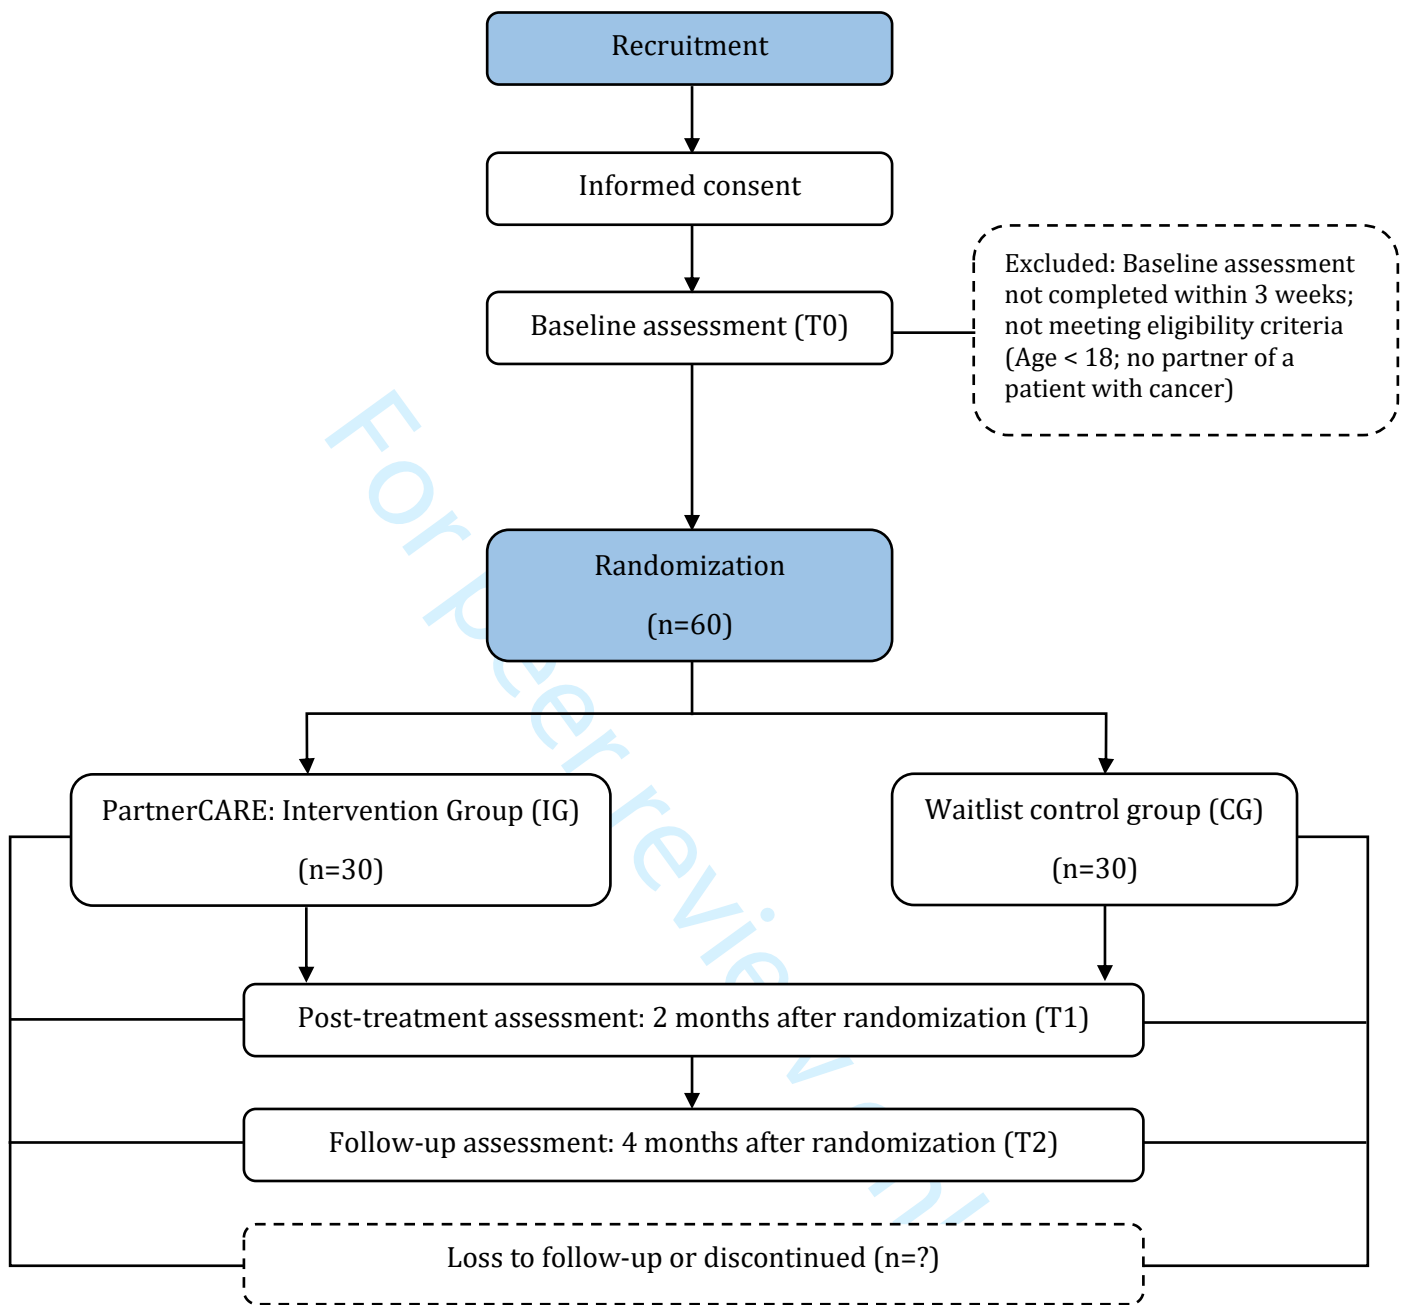

Figure 1 Flow diagram of the study procedure

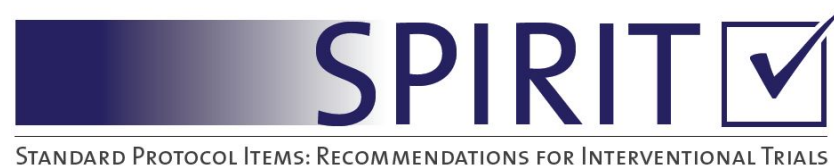

SPIRIT 2013 Checklist: Recommended items to address in a clinical trial protocol and related documents\*

| Section/item                      | Item No | Description                                                                                                                                                                                                                                                                              | Addressed on page number |
|-----------------------------------|---------|------------------------------------------------------------------------------------------------------------------------------------------------------------------------------------------------------------------------------------------------------------------------------------------|--------------------------|
| <b>Administrative information</b> |         |                                                                                                                                                                                                                                                                                          |                          |
| Title                             | 1       | Descriptive title identifying the study design, population, interventions, and, if applicable, trial acronym                                                                                                                                                                             | 1                        |
| Trial registration                | 2a      | Trial identifier and registry name. If not yet registered, name of intended registry                                                                                                                                                                                                     | 2, 22                    |
|                                   | 2b      | All items from the World Health Organization Trial Registration Data Set                                                                                                                                                                                                                 | 2                        |
| Protocol version                  | 3       | Date and version identifier                                                                                                                                                                                                                                                              | 1                        |
| Funding                           | 4       | Sources and types of financial, material, and other support                                                                                                                                                                                                                              | 22                       |
| Roles and responsibilities        | 5a      | Names, affiliations, and roles of protocol contributors                                                                                                                                                                                                                                  | 1                        |
|                                   | 5b      | Name and contact information for the trial sponsor                                                                                                                                                                                                                                       | -                        |
|                                   | 5c      | Role of study sponsor and funders, if any, in study design; collection, management, analysis, and interpretation of data; writing of the report; and the decision to submit the report for publication, including whether they will have ultimate authority over any of these activities | 22-23                    |
|                                   | 5d      | Composition, roles, and responsibilities of the coordinating centre, steering committee, endpoint adjudication committee, data management team, and other individuals or groups overseeing the trial, if applicable (see Item 21a for data monitoring committee)                         | -                        |



1 **Introduction**

2

3 Background and rationale 6a Description of research question and justification for undertaking the trial, including summary of relevant studies (published and unpublished) examining benefits and harms for each intervention 4-5

4

5

6 6b Explanation for choice of comparators 13

7

8 Objectives 7 Specific objectives or hypotheses 5

9

10 Trial design 8 Description of trial design including type of trial (eg, parallel group, crossover, factorial, single group), allocation ratio, and framework (eg, superiority, equivalence, noninferiority, exploratory) 5-6

11

12

13

14 **Methods: Participants, interventions, and outcomes**

15

16 Study setting 9 Description of study settings (eg, community clinic, academic hospital) and list of countries where data will be collected. Reference to where list of study sites can be obtained 6

17

18

19 Eligibility criteria 10 Inclusion and exclusion criteria for participants. If applicable, eligibility criteria for study centres and individuals who will perform the interventions (eg, surgeons, psychotherapists) 6

20

21

22 Interventions 11a Interventions for each group with sufficient detail to allow replication, including how and when they will be administered 7-12

23

24

25 11b Criteria for discontinuing or modifying allocated interventions for a given trial participant (eg, drug dose change in response to harms, participant request, or improving/worsening disease) -

26

27

28 11c Strategies to improve adherence to intervention protocols, and any procedures for monitoring adherence (eg, drug tablet return, laboratory tests) 7-9

29

30

31 11d Relevant concomitant care and interventions that are permitted or prohibited during the trial -

32

33

34 Outcomes 12 Primary, secondary, and other outcomes, including the specific measurement variable (eg, systolic blood pressure), analysis metric (eg, change from baseline, final value, time to event), method of aggregation (eg, median, proportion), and time point for each outcome. Explanation of the clinical relevance of chosen efficacy and harm outcomes is strongly recommended 13-18

35

36

37

38

39

40 Participant timeline 13 Time schedule of enrolment, interventions (including any run-ins and washouts), assessments, and visits for participants. A schematic diagram is highly recommended (see Figure) 7, Fig. 1 (Flowchart)

41

42

43

44

45

46

|   |             |    |                                                                                                                                                                                       |    |
|---|-------------|----|---------------------------------------------------------------------------------------------------------------------------------------------------------------------------------------|----|
| 1 | Sample size | 14 | Estimated number of participants needed to achieve study objectives and how it was determined, including clinical and statistical assumptions supporting any sample size calculations | 13 |
| 2 |             |    |                                                                                                                                                                                       |    |
| 3 |             |    |                                                                                                                                                                                       |    |
| 4 | Recruitment | 15 | Strategies for achieving adequate participant enrolment to reach target sample size                                                                                                   | 6  |
| 5 |             |    |                                                                                                                                                                                       |    |

6 **Methods: Assignment of interventions (for controlled trials)**

7 Allocation:

|    |                     |     |                                                                                                                                                                                                                                                                                                                                                          |   |
|----|---------------------|-----|----------------------------------------------------------------------------------------------------------------------------------------------------------------------------------------------------------------------------------------------------------------------------------------------------------------------------------------------------------|---|
| 10 | Sequence generation | 16a | Method of generating the allocation sequence (eg, computer-generated random numbers), and list of any factors for stratification. To reduce predictability of a random sequence, details of any planned restriction (eg, blocking) should be provided in a separate document that is unavailable to those who enrol participants or assign interventions | 7 |
| 11 |                     |     |                                                                                                                                                                                                                                                                                                                                                          |   |
| 12 |                     |     |                                                                                                                                                                                                                                                                                                                                                          |   |
| 13 |                     |     |                                                                                                                                                                                                                                                                                                                                                          |   |
| 14 |                     |     |                                                                                                                                                                                                                                                                                                                                                          |   |
| 15 |                     |     |                                                                                                                                                                                                                                                                                                                                                          |   |

|    |                                  |     |                                                                                                                                                                                                           |     |
|----|----------------------------------|-----|-----------------------------------------------------------------------------------------------------------------------------------------------------------------------------------------------------------|-----|
| 16 | Allocation concealment mechanism | 16b | Mechanism of implementing the allocation sequence (eg, central telephone; sequentially numbered, opaque, sealed envelopes), describing any steps to conceal the sequence until interventions are assigned | 6-7 |
| 17 |                                  |     |                                                                                                                                                                                                           |     |
| 18 |                                  |     |                                                                                                                                                                                                           |     |
| 19 |                                  |     |                                                                                                                                                                                                           |     |

|    |                |     |                                                                                                                           |   |
|----|----------------|-----|---------------------------------------------------------------------------------------------------------------------------|---|
| 20 | Implementation | 16c | Who will generate the allocation sequence, who will enrol participants, and who will assign participants to interventions | 7 |
| 21 |                |     |                                                                                                                           |   |
| 22 |                |     |                                                                                                                           |   |
| 23 |                |     |                                                                                                                           |   |

|    |                    |     |                                                                                                                                           |   |
|----|--------------------|-----|-------------------------------------------------------------------------------------------------------------------------------------------|---|
| 24 | Blinding (masking) | 17a | Who will be blinded after assignment to interventions (eg, trial participants, care providers, outcome assessors, data analysts), and how | - |
| 25 |                    |     |                                                                                                                                           |   |
| 26 |                    |     |                                                                                                                                           |   |

|    |  |     |                                                                                                                                                      |   |
|----|--|-----|------------------------------------------------------------------------------------------------------------------------------------------------------|---|
| 27 |  | 17b | If blinded, circumstances under which unblinding is permissible, and procedure for revealing a participant's allocated intervention during the trial | - |
| 28 |  |     |                                                                                                                                                      |   |
| 29 |  |     |                                                                                                                                                      |   |
| 30 |  |     |                                                                                                                                                      |   |

31 **Methods: Data collection, management, and analysis**

|    |                         |     |                                                                                                                                                                                                                                                                                                                                                                                                              |       |
|----|-------------------------|-----|--------------------------------------------------------------------------------------------------------------------------------------------------------------------------------------------------------------------------------------------------------------------------------------------------------------------------------------------------------------------------------------------------------------|-------|
| 33 | Data collection methods | 18a | Plans for assessment and collection of outcome, baseline, and other trial data, including any related processes to promote data quality (eg, duplicate measurements, training of assessors) and a description of study instruments (eg, questionnaires, laboratory tests) along with their reliability and validity, if known. Reference to where data collection forms can be found, if not in the protocol | 13-18 |
| 34 |                         |     |                                                                                                                                                                                                                                                                                                                                                                                                              |       |
| 35 |                         |     |                                                                                                                                                                                                                                                                                                                                                                                                              |       |
| 36 |                         |     |                                                                                                                                                                                                                                                                                                                                                                                                              |       |
| 37 |                         |     |                                                                                                                                                                                                                                                                                                                                                                                                              |       |

|    |  |     |                                                                                                                                                                                           |        |
|----|--|-----|-------------------------------------------------------------------------------------------------------------------------------------------------------------------------------------------|--------|
| 38 |  | 18b | Plans to promote participant retention and complete follow-up, including list of any outcome data to be collected for participants who discontinue or deviate from intervention protocols | 13, 15 |
| 39 |  |     |                                                                                                                                                                                           |        |
| 40 |  |     |                                                                                                                                                                                           |        |
| 41 |  |     |                                                                                                                                                                                           |        |
| 42 |  |     |                                                                                                                                                                                           |        |

|    |                                 |     |                                                                                                                                                                                                                                                                                                                                       |           |
|----|---------------------------------|-----|---------------------------------------------------------------------------------------------------------------------------------------------------------------------------------------------------------------------------------------------------------------------------------------------------------------------------------------|-----------|
| 1  | Data management                 | 19  | Plans for data entry, coding, security, and storage, including any related processes to promote data quality (eg, double data entry; range checks for data values). Reference to where details of data management procedures can be found, if not in the protocol                                                                     | 6, 13, 22 |
| 2  |                                 |     |                                                                                                                                                                                                                                                                                                                                       |           |
| 3  |                                 |     |                                                                                                                                                                                                                                                                                                                                       |           |
| 4  |                                 |     |                                                                                                                                                                                                                                                                                                                                       |           |
| 5  | Statistical methods             | 20a | Statistical methods for analysing primary and secondary outcomes. Reference to where other details of the statistical analysis plan can be found, if not in the protocol                                                                                                                                                              | 18-19     |
| 6  |                                 |     |                                                                                                                                                                                                                                                                                                                                       |           |
| 7  |                                 |     |                                                                                                                                                                                                                                                                                                                                       |           |
| 8  |                                 | 20b | Methods for any additional analyses (eg, subgroup and adjusted analyses)                                                                                                                                                                                                                                                              | -         |
| 9  |                                 |     |                                                                                                                                                                                                                                                                                                                                       |           |
| 10 |                                 | 20c | Definition of analysis population relating to protocol non-adherence (eg, as randomised analysis), and any statistical methods to handle missing data (eg, multiple imputation)                                                                                                                                                       | 18-19     |
| 11 |                                 |     |                                                                                                                                                                                                                                                                                                                                       |           |
| 12 |                                 |     |                                                                                                                                                                                                                                                                                                                                       |           |
| 13 |                                 |     |                                                                                                                                                                                                                                                                                                                                       |           |
| 14 | <b>Methods: Monitoring</b>      |     |                                                                                                                                                                                                                                                                                                                                       |           |
| 15 |                                 |     |                                                                                                                                                                                                                                                                                                                                       |           |
| 16 | Data monitoring                 | 21a | Composition of data monitoring committee (DMC); summary of its role and reporting structure; statement of whether it is independent from the sponsor and competing interests; and reference to where further details about its charter can be found, if not in the protocol. Alternatively, an explanation of why a DMC is not needed | -         |
| 17 |                                 |     |                                                                                                                                                                                                                                                                                                                                       |           |
| 18 |                                 |     |                                                                                                                                                                                                                                                                                                                                       |           |
| 19 |                                 |     |                                                                                                                                                                                                                                                                                                                                       |           |
| 20 |                                 |     |                                                                                                                                                                                                                                                                                                                                       |           |
| 21 |                                 |     |                                                                                                                                                                                                                                                                                                                                       |           |
| 22 |                                 | 21b | Description of any interim analyses and stopping guidelines, including who will have access to these interim results and make the final decision to terminate the trial                                                                                                                                                               | -         |
| 23 |                                 |     |                                                                                                                                                                                                                                                                                                                                       |           |
| 24 |                                 |     |                                                                                                                                                                                                                                                                                                                                       |           |
| 25 | Harms                           | 22  | Plans for collecting, assessing, reporting, and managing solicited and spontaneously reported adverse events and other unintended effects of trial interventions or trial conduct                                                                                                                                                     | 14        |
| 26 |                                 |     |                                                                                                                                                                                                                                                                                                                                       |           |
| 27 |                                 |     |                                                                                                                                                                                                                                                                                                                                       |           |
| 28 | Auditing                        | 23  | Frequency and procedures for auditing trial conduct, if any, and whether the process will be independent from investigators and the sponsor                                                                                                                                                                                           | -         |
| 29 |                                 |     |                                                                                                                                                                                                                                                                                                                                       |           |
| 30 |                                 |     |                                                                                                                                                                                                                                                                                                                                       |           |
| 31 |                                 |     |                                                                                                                                                                                                                                                                                                                                       |           |
| 32 | <b>Ethics and dissemination</b> |     |                                                                                                                                                                                                                                                                                                                                       |           |
| 33 |                                 |     |                                                                                                                                                                                                                                                                                                                                       |           |
| 34 | Research ethics approval        | 24  | Plans for seeking research ethics committee/institutional review board (REC/IRB) approval                                                                                                                                                                                                                                             | 22        |
| 35 |                                 |     |                                                                                                                                                                                                                                                                                                                                       |           |
| 36 |                                 |     |                                                                                                                                                                                                                                                                                                                                       |           |
| 37 | Protocol amendments             | 25  | Plans for communicating important protocol modifications (eg, changes to eligibility criteria, outcomes, analyses) to relevant parties (eg, investigators, REC/IRBs, trial participants, trial registries, journals, regulators)                                                                                                      | 22        |
| 38 |                                 |     |                                                                                                                                                                                                                                                                                                                                       |           |
| 39 |                                 |     |                                                                                                                                                                                                                                                                                                                                       |           |
| 40 |                                 |     |                                                                                                                                                                                                                                                                                                                                       |           |
| 41 |                                 |     |                                                                                                                                                                                                                                                                                                                                       |           |
| 42 |                                 |     |                                                                                                                                                                                                                                                                                                                                       |           |
| 43 |                                 |     |                                                                                                                                                                                                                                                                                                                                       |           |
| 44 |                                 |     |                                                                                                                                                                                                                                                                                                                                       |           |
| 45 |                                 |     |                                                                                                                                                                                                                                                                                                                                       |           |
| 46 |                                 |     |                                                                                                                                                                                                                                                                                                                                       |           |

|    |                               |     |                                                                                                                                                                                                                                                                                     |          |
|----|-------------------------------|-----|-------------------------------------------------------------------------------------------------------------------------------------------------------------------------------------------------------------------------------------------------------------------------------------|----------|
| 1  | Consent or assent             | 26a | Who will obtain informed consent or assent from potential trial participants or authorised surrogates, and how (see Item 32)                                                                                                                                                        | 6, 22    |
| 2  |                               |     |                                                                                                                                                                                                                                                                                     |          |
| 3  |                               |     |                                                                                                                                                                                                                                                                                     |          |
| 4  |                               | 26b | Additional consent provisions for collection and use of participant data and biological specimens in ancillary studies, if applicable                                                                                                                                               | -        |
| 5  |                               |     |                                                                                                                                                                                                                                                                                     |          |
| 6  |                               |     |                                                                                                                                                                                                                                                                                     |          |
| 7  | Confidentiality               | 27  | How personal information about potential and enrolled participants will be collected, shared, and maintained in order to protect confidentiality before, during, and after the trial                                                                                                | 6, 13,22 |
| 8  |                               |     |                                                                                                                                                                                                                                                                                     |          |
| 9  |                               |     |                                                                                                                                                                                                                                                                                     |          |
| 10 | Declaration of interests      | 28  | Financial and other competing interests for principal investigators for the overall trial and each study site                                                                                                                                                                       | 22-23    |
| 11 |                               |     |                                                                                                                                                                                                                                                                                     |          |
| 12 |                               |     |                                                                                                                                                                                                                                                                                     |          |
| 13 | Access to data                | 29  | Statement of who will have access to the final trial dataset, and disclosure of contractual agreements that limit such access for investigators                                                                                                                                     | 22       |
| 14 |                               |     |                                                                                                                                                                                                                                                                                     |          |
| 15 |                               |     |                                                                                                                                                                                                                                                                                     |          |
| 16 | Ancillary and post-trial care | 30  | Provisions, if any, for ancillary and post-trial care, and for compensation to those who suffer harm from trial participation                                                                                                                                                       | -        |
| 17 |                               |     |                                                                                                                                                                                                                                                                                     |          |
| 18 |                               |     |                                                                                                                                                                                                                                                                                     |          |
| 19 |                               |     |                                                                                                                                                                                                                                                                                     |          |
| 20 | Dissemination policy          | 31a | Plans for investigators and sponsor to communicate trial results to participants, healthcare professionals, the public, and other relevant groups (eg, via publication, reporting in results databases, or other data sharing arrangements), including any publication restrictions | 2        |
| 21 |                               |     |                                                                                                                                                                                                                                                                                     |          |
| 22 |                               |     |                                                                                                                                                                                                                                                                                     |          |
| 23 |                               |     |                                                                                                                                                                                                                                                                                     |          |
| 24 |                               | 31b | Authorship eligibility guidelines and any intended use of professional writers                                                                                                                                                                                                      | -        |
| 25 |                               |     |                                                                                                                                                                                                                                                                                     |          |
| 26 |                               | 31c | Plans, if any, for granting public access to the full protocol, participant-level dataset, and statistical code                                                                                                                                                                     | -        |
| 27 |                               |     |                                                                                                                                                                                                                                                                                     |          |
| 28 |                               |     |                                                                                                                                                                                                                                                                                     |          |
| 29 | <b>Appendices</b>             |     |                                                                                                                                                                                                                                                                                     |          |
| 30 |                               |     |                                                                                                                                                                                                                                                                                     |          |
| 31 | Informed consent materials    | 32  | Model consent form and other related documentation given to participants and authorised surrogates                                                                                                                                                                                  | -        |
| 32 |                               |     |                                                                                                                                                                                                                                                                                     |          |
| 33 |                               |     |                                                                                                                                                                                                                                                                                     |          |
| 34 | Biological specimens          | 33  | Plans for collection, laboratory evaluation, and storage of biological specimens for genetic or molecular analysis in the current trial and for future use in ancillary studies, if applicable                                                                                      | -        |
| 35 |                               |     |                                                                                                                                                                                                                                                                                     |          |
| 36 |                               |     |                                                                                                                                                                                                                                                                                     |          |

37 \*It is strongly recommended that this checklist be read in conjunction with the SPIRIT 2013 Explanation & Elaboration for important clarification on the items.  
 38 Amendments to the protocol should be tracked and dated. The SPIRIT checklist is copyrighted by the SPIRIT Group under the Creative Commons  
 39 [“Attribution-NonCommercial-NoDerivs 3.0 Unported”](https://creativecommons.org/licenses/by/4.0/) license.  
 40  
 41  
 42
